# Supplementary material for: Synthesis and characterisation of new silicon–perfluoropropenyl compounds
Source: Royal Society of Chemistry journal article supplement (doi:10.1039/d3ra01353g), 2023-01-01
Supplement: d3ra01353g1.pdf [file d3ra01353g1.pdf]

## Synthesis and Characterisation of New Silicon-Perfluoropropenyl Compounds

Lulu Alluhaibi,<sup>a</sup> Alan Brisdon,<sup>b</sup> Sylwia Klejna<sup>a</sup> and Abeer Muneer<sup>b</sup>

<sup>a</sup>.Academic Centre for Materials and Nanotechnology, AGH University of Science and Technology, 30-055 Kraków, Poland.

<sup>b</sup>.School of Chemistry, The University of Manchester, Manchester M13 9PL, UK

### Contents

|                                                                                   |          |
|-----------------------------------------------------------------------------------|----------|
| <b>General methods .....</b>                                                      | <b>2</b> |
| <b>1. Synthetic Reactions.....</b>                                                | <b>2</b> |
| 1-1. General Synthesis Method of $R_{4-n}Si(E-CF=CFCF_3)_n$ (G.P1) .....          | 2        |
| 1-1-1. Synthesis of $(Et)_3Si(E-CF=CFCF_3)$ (a.1) .....                           | 3        |
| 1-1-2. Synthesis of ${}^nBu_3Si(E-CF=CFCF_3)$ (a.2) .....                         | 3        |
| 1-1-3. Synthesis of $ClCH_2(Me)_2Si(E-CF=CFCF_3)$ (a.3).....                      | 3        |
| 1-1-4. Synthesis of ${}^nBu(Me)_2Si(E-CF=CFCF_3)$ (a.4) .....                     | 3        |
| 1-1-5. Synthesis of $(Me)_2PhSi(E-CF=CFCF_3)$ (a.5) .....                         | 4        |
| 1-1-6. Synthesis of $(Ph)_2MeSi(E-CF=CFCF_3)$ (a.6) .....                         | 4        |
| 1-1-7. Synthesis of $(Me)_2Si(E-CF=CFCF_3)_2$ (a.7) .....                         | 4        |
| 1-1-8. Synthesis of $({}^iPr)_2Si(E-CF=CFCF_3)_2$ (a.8) .....                     | 4        |
| 1-1-9. Synthesis of $(Ph)_2Si(E-CF=CFCF_3)_2$ (a.9) .....                         | 4        |
| 1-1-10. Synthesis of $PhSi(E-CF=CFCF_3)_3$ (a.10) .....                           | 5        |
| 1-1-11. Synthesis of $Si(E-CF=CFCF_3)_4$ (a.11) .....                             | 5        |
| <b>2. <math>R_{4-n}Si(E-CF=CFCF_3)_n</math> Reactions .....</b>                   | <b>5</b> |
| 2-1. General Substitution Reactions (G.P2).....                                   | 5        |
| 2-1-1. Reaction between $Et_3Si(E-CF=CFCF_3)$ (a.1) and ${}^nBuLi$ .....          | 5        |
| 2-1-2. Reaction between $Et_3Si(E-CF=CFCF_3)$ (a.1) and ${}^tBuLi$ .....          | 6        |
| 2-1-3. Reaction between $Et_3Si(E-CF=CFCF_3)$ (a.1) and $MeLi$ .....              | 6        |
| 2-1-4. Reaction between $Et_3Si(E-CF=CFCF_3)$ (a.1) and $PhLi$ .....              | 6        |
| 2-1-5. Reaction between ${}^nBu_3Si(E-CF=CFCF_3)$ (a.2) and ${}^nBuLi$ .....      | 7        |
| 2-1-6. Reaction between ${}^nBu_3Si(E-CF=CFCF_3)$ (a.2) and ${}^tBuLi$ .....      | 7        |
| 2-1-7. Reaction between ${}^nBu_3Si(E-CF=CFCF_3)$ (a.2) and $MeLi$ .....          | 7        |
| 2-1-8. Reaction between ${}^nBu_3Si(E-CF=CFCF_3)$ (a.2) and $PhLi$ .....          | 8        |
| 2-1-9. Reaction between ${}^nBu(Me)_2Si(E-CF=CFCF_3)$ (a.4) and ${}^nBuLi$ .....  | 8        |
| 2-1-10. Reaction between ${}^nBu(Me)_2Si(E-CF=CFCF_3)$ (a.4) and ${}^tBuLi$ ..... | 9        |
| 2-1-11. Reaction between ${}^nBu(Me)_2Si(E-CF=CFCF_3)$ (a.4) and $MeLi$ .....     | 9        |
| 2-1-12. Reaction between $Me_2PhSi(E-CF=CFCF_3)$ (a.5) and ${}^nBuLi$ .....       | 9        |
| 2-1-13. Reaction between $Me_2PhSi(E-CF=CFCF_3)$ (a.5) and ${}^tBuLi$ .....       | 10       |
| 2-1-14. Reaction between $Me_2PhSi(E-CF=CFCF_3)$ (a.5) and $MeLi$ .....           | 10       |
| 2-1-15. Reaction between $Ph_2MeSi(E-CF=CFCF_3)$ (a.6) and ${}^nBuLi$ .....       | 10       |
| 2-1-16. Reaction between $Ph_2MeSi(E-CF=CFCF_3)$ (a.6) and ${}^tBuLi$ .....       | 11       |

|                                                                                                                    |           |
|--------------------------------------------------------------------------------------------------------------------|-----------|
| 2-1-17. Reaction between $\text{Ph}_2\text{MeSi}(E\text{-CF}=\text{CFCF}_3)$ (3.6) and $\text{MeLi}$ .....         | 11        |
| 2-1-18. Reaction between $\text{Ph}_2\text{MeSi}(E\text{-CF}=\text{CFCF}_3)$ (a.6) and $\text{PhLi}$ .....         | 11        |
| 2-1-19. Reaction between $\text{Me}_2\text{Si}(E\text{-CF}=\text{CFCF}_3)_2$ (a.7) and ${}^n\text{BuLi}$ .....     | 11        |
| 2-1-20. Reaction between $\text{Me}_2\text{Si}(E\text{-CF}=\text{CFCF}_3)_2$ (a.7) and ${}^t\text{BuLi}$ .....     | 12        |
| 2-1-21. Reaction between $\text{Me}_2\text{Si}(E\text{-CF}=\text{CFCF}_3)_2$ (a.7) and $\text{MeLi}$ .....         | 12        |
| 2-1-22. Reaction between ${}^i\text{Pr}_2\text{Si}(E\text{-CF}=\text{CFCF}_3)_2$ (a.8) and ${}^n\text{BuLi}$ ..... | 12        |
| 2-1-23. Reaction between ${}^i\text{Pr}_2\text{Si}(E\text{-CF}=\text{CFCF}_3)_2$ (a.8) and ${}^t\text{BuLi}$ ..... | 13        |
| 2-1-24. Reaction between ${}^i\text{Pr}_2\text{Si}(E\text{-CF}=\text{CFCF}_3)_2$ (a.8) and $\text{MeLi}$ .....     | 13        |
| 2-1-25. Reaction between $\text{Ph}_2\text{Si}(E\text{-CF}=\text{CFCF}_3)_2$ (a.9) and ${}^n\text{BuLi}$ .....     | 13        |
| 2-1-26. Reaction between $\text{Ph}_2\text{Si}(E\text{-CF}=\text{CFCF}_3)_2$ (a.9) and $\text{PhLi}$ .....         | 13        |
| <b>3. DFT calculations .....</b>                                                                                   | <b>14</b> |
| 3.1 Calculated Mulliken Charges .....                                                                              | 14        |
| 3.1.1 $(\text{Me})_2\text{Si}(E\text{-CF}=\text{CFCF}_3)_2$ (a.5) .....                                            | 14        |
| 3.1.2 $(\text{Ph})_2\text{Si}(E\text{-CF}=\text{CFCF}_3)_2$ (a.9) .....                                            | 16        |
| 3.1.3 $(\text{Ph})\text{Si}(E\text{-CF}=\text{CFCF}_3)_3$ (a.10).....                                              | 18        |
| 3.2 Electronic structure and DFT reaction energetics for substitution reaction with nucleophilic sources           | 21        |
| <b>4. Crystallographic data .....</b>                                                                              | <b>23</b> |
| <b>5. References.....</b>                                                                                          | <b>25</b> |

## General methods

### 1. Synthetic Reactions

#### 1-1. General Synthesis Method of $\text{R}_{4-n}\text{Si}(E\text{-CF}=\text{CFCF}_3)_n$ (G.P1)

In all the synthetic reactions,  $\text{LiCF}=\text{CFCF}_3$  was prepared following the same procedure described below but on different scales. In a three-necked round-bottom flask under a positive pressure of nitrogen cooled to between  $-75$  to  $-80$  °C were placed dry diethyl ether (150 mL) and one equivalent of *Z*-HFC-1225ye. One equivalent of  ${}^n\text{BuLi}$  (2.5 M solution in hexanes) was added slowly so as to maintain the temperature below  $-78$  °C. The solution was stirred for 1 h to ensure formation of perfluoropropenyl lithium. In the next step, a solution of the appropriate silicon-halide was added slowly. The mixture was left to stir and warm slowly to room temperature overnight. Hexane (25 mL) was added to the reaction mixture and the resulting solution was filtered through a pad of celite, and solvent was removed using a rotary evaporator.

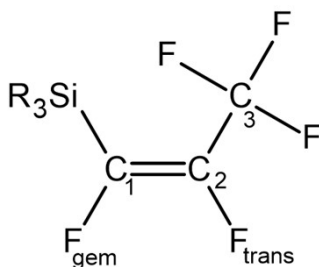

**Figure 1** Skeleton of general structure of  $\text{R}_{4-n}\text{Si}(E\text{-CF}=\text{CFCF}_3)_n$

### 1-1-1. Synthesis of (Et)<sub>3</sub>Si(E-CF=CFCF<sub>3</sub>) (a.1)

Z-HFC-1225ye (4.7 mL, 48.0 mmol), <sup>n</sup>BuLi (2.5 M, 19.0 mL, 48.0 mmol), and (Et)<sub>3</sub>SiCl (5.0 mL, 32.0 mmol). The product was isolated as a yellow liquid after work up using (G.P1). Yield (4.0 g, 16.0 mmol, 50 %). Anal.Calcd for C<sub>9</sub>H<sub>15</sub>F<sub>5</sub>Si: C, 43.89; H, 6.14 %. Found: C, 43.20; H, 5.95 %. <sup>19</sup>F{<sup>1</sup>H} NMR (376 MHz, CDCl<sub>3</sub>, 291 K) δ ppm: -68.13 (d.d, 3F, <sup>3</sup>J(CF<sub>3</sub> F<sub>trans</sub>) = 13.8 Hz, <sup>4</sup>J(CF<sub>3</sub> F<sub>gem</sub>) = 6.5 Hz, CF<sub>3</sub>), -137.16 (q.d, 1F, <sup>3</sup>J(F<sub>gem</sub> F<sub>trans</sub>) = 13.0 Hz, <sup>4</sup>J(F<sub>gem</sub> CF<sub>3</sub>) = 6.5 Hz, 1F, F<sub>gem</sub>), -141.20 (q.d, <sup>3</sup>J(F<sub>trans</sub> CF<sub>3</sub>) = 13.8 Hz, <sup>3</sup>J(F<sub>trans</sub> F<sub>gem</sub>) = 13.5 Hz, F<sub>trans</sub>). <sup>1</sup>H NMR (400 MHz, CDCl<sub>3</sub>, 291 K) δ ppm: 0.7 (q, 6H, <sup>3</sup>J(CH<sub>2</sub> CH<sub>3</sub>) = 7.9 Hz, CH<sub>2</sub>), 0.92 (t, 9H, <sup>3</sup>J(CH<sub>3</sub> CH<sub>2</sub>) = 7.8 Hz, CH<sub>3</sub>). <sup>13</sup>C{<sup>1</sup>H} NMR (100 MHz, CDCl<sub>3</sub>, 298 K) δ ppm: 0.05 (s, CH<sub>2</sub>), 4.16 (s, CH<sub>3</sub>), 117.00 (q.d.d, <sup>1</sup>J(C<sub>3</sub> 3F) = 270.6 Hz, <sup>2</sup>J(C<sub>3</sub> F<sub>trans</sub>) = 37.0 Hz, <sup>3</sup>J(C<sub>3</sub> F<sub>gem</sub>) = 10.3 Hz, C<sub>3</sub>), 144.00 (d.q.d, <sup>1</sup>J(C<sub>2</sub> F<sub>trans</sub>) = 270.4 Hz, <sup>2</sup>J(C<sub>2</sub> 3F) = 39.6 Hz, <sup>2</sup>J(C<sub>2</sub> F<sub>gem</sub>) = 20.3 Hz, C<sub>2</sub>), 155.20 (d.q.d, <sup>1</sup>J(C<sub>1</sub> F<sub>gem</sub>) = 287.9 Hz, <sup>3</sup>J(C<sub>1</sub> 3F) = 4.7 Hz, <sup>2</sup>J(C<sub>1</sub> F<sub>trans</sub>) = 1.7 Hz, C<sub>1</sub>). <sup>29</sup>Si{<sup>1</sup>H} NMR (79 MHz, CDCl<sub>3</sub>, 298 K) δ ppm: 6.98 (d, <sup>1</sup>J(Si F<sub>gem</sub>) = 23.5 Hz). ν<sub>max</sub>/cm<sup>-1</sup> 1240 (C-Si, w), 1360, 1410, 1460 (C-F, str), 1700 (C=C, m), 2870, 2910, 2955 (C-H, str).

### 1-1-2. Synthesis of <sup>n</sup>Bu<sub>3</sub>Si(E-CF=CFCF<sub>3</sub>) (a.2)

Z-HFC-1225ye (4.7 mL, 45.0 mmol), <sup>n</sup>BuLi (2.5 M, 21.6 mL, 45.0 mmol), and <sup>n</sup>Bu<sub>3</sub>SiCl (8.0 mL, 30.0 mmol). The product was isolated as a yellow liquid after purification by column chromatography on silica with (1:1) diethyl ether : hexane eluent. Yield (5.0 g, 15.0 mmol, 50 %). Anal.Calcd for C<sub>15</sub>H<sub>27</sub>F<sub>5</sub>Si: C, 54.52; H, 8.24 %. Found: C, 54.06; H, 8.20 %. <sup>19</sup>F{<sup>1</sup>H} NMR (376 MHz, CDCl<sub>3</sub>, 291 K) δ ppm: -67.91 (d.d, 3F, <sup>4</sup>J(CF<sub>3</sub> F<sub>trans</sub>) = 13.7 Hz, <sup>4</sup>J(CF<sub>3</sub> F<sub>gem</sub>) = 6.4 Hz, CF<sub>3</sub>), -136.57 (q.d, 1F, <sup>3</sup>J(F<sub>gem</sub> F<sub>trans</sub>) = 11.9 Hz, <sup>4</sup>J(F<sub>gem</sub> CF<sub>3</sub>) = 6.2 Hz, F<sub>gem</sub>), -141.33 (d.q, 1F, <sup>3</sup>J(F<sub>trans</sub> CF<sub>3</sub>) = 13.8 Hz, <sup>3</sup>J(F<sub>trans</sub> F<sub>gem</sub>) = 11.8 Hz, F<sub>trans</sub>). <sup>1</sup>H NMR (400 MHz, CDCl<sub>3</sub>, 291 K) δ ppm: 0.43 (t, 6H, <sup>3</sup>J(CH<sub>2</sub> CH<sub>3</sub>) = 6.0 Hz, CH<sub>2</sub>), 0.82 (t, 9H, <sup>3</sup>J(CH<sub>3</sub> CH<sub>2</sub>) = 7.0 Hz, CH<sub>3</sub>), 1.23 (m, 12H, CH<sub>2</sub>CH<sub>2</sub>). <sup>13</sup>C{<sup>1</sup>H} NMR (100 MHz, CDCl<sub>3</sub>, 298 K) δ ppm: 13.78 (s, Si-CH<sub>2</sub>), 15.46 (s, CH<sub>3</sub>), 25.52 (s, CH<sub>2</sub>), 26.66 (s, CH<sub>2</sub>), 119.40 (m, C<sub>3</sub>), 145.80 (m, C<sub>2</sub>), 158.40 (m, C<sub>1</sub>). <sup>29</sup>Si{<sup>1</sup>H} NMR (79 MHz, CDCl<sub>3</sub>, 298 K) δ ppm: 3.00 (d, <sup>1</sup>J(Si F<sub>gem</sub>) = 23.6 Hz). ν<sub>max</sub>/cm<sup>-1</sup> 1295 (C-Si, m), 1365, 1460, 1475 (C-F, str), 2870, 2920, 2950 (C-H, str).

### 1-1-3. Synthesis of ClCH<sub>2</sub>(Me)<sub>2</sub>Si(E-CF=CFCF<sub>3</sub>) (a.3)

Z-HFC-1225ye (3.0 mL, 30.0 mmol), <sup>n</sup>BuLi (2.5 M, 12.0 mL, 30 mmol), and ClCH<sub>2</sub>(CH<sub>3</sub>)<sub>2</sub>SiCl (2.6 mL, 20.0 mmol). The product was isolated as a yellow liquid after work up using (G.P1). Yield (3.0 g, 12.6 mmol, 63 %). Anal.Calcd for C<sub>6</sub>H<sub>8</sub>ClF<sub>5</sub>Si: C, 30.19; H, 3.38; Cl, 14.87 %. Found: C, 30.06; H, 3.15; Cl, 14.18 %. <sup>19</sup>F{<sup>1</sup>H} NMR (376 MHz, CDCl<sub>3</sub>, 291K) δ ppm: -67.83 (d.d, 3F, <sup>3</sup>J(CF<sub>3</sub> F<sub>trans</sub>) = 13.3 Hz, <sup>4</sup>J(CF<sub>3</sub> F<sub>gem</sub>) = 6.2 Hz, CF<sub>3</sub>), -139.14 (m, 1F, F<sub>trans</sub>), -139.02 (m, 1F, F<sub>gem</sub>). <sup>1</sup>H NMR (400 MHz, CDCl<sub>3</sub>, 291K) δ ppm: 0.21(s, 3H, CH<sub>3</sub>), 2.75 (s, 2H, CH<sub>2</sub>). <sup>13</sup>C{<sup>1</sup>H} NMR (100 MHz, CDCl<sub>3</sub>, 298 K) δ ppm: -5.41 (s, CH<sub>3</sub>), 27.32 (s, CH<sub>2</sub>), 119.00 (q.d.d, <sup>1</sup>J(C<sub>3</sub> 3F) = 270.3 Hz, <sup>2</sup>J(C<sub>3</sub> F<sub>trans</sub>) = 36.6 Hz, <sup>3</sup>J(C<sub>3</sub> F<sub>gem</sub>) = 10.2 Hz, C<sub>3</sub>), 146.40 (d.d.q, <sup>1</sup>J(C<sub>2</sub> F<sub>trans</sub>) = 253.8 Hz, <sup>2</sup>J(C<sub>2</sub> 3F) = 39.7 Hz, <sup>2</sup>J(C<sub>2</sub> F<sub>gem</sub>) = 20.8 Hz, C<sub>2</sub>), 155.95 (d.q, <sup>1</sup>J(C<sub>1</sub> F<sub>gem</sub>) = 287.2 Hz, <sup>3</sup>J(C<sub>1</sub> 3F) = 4.6 Hz, C<sub>1</sub>). <sup>29</sup>Si{<sup>1</sup>H} NMR (79 MHz, CDCl<sub>3</sub>, 298 K) δ ppm: -1.50 (d, <sup>1</sup>J(Si F<sub>gem</sub>) = 27.5 Hz). ν<sub>max</sub>/cm<sup>-1</sup> 1260 (C-Si, m), 1360 (C-F, str), 1665 (C=C, w), 2965 (C-H, str).

### 1-1-4. Synthesis of <sup>n</sup>Bu(Me)<sub>2</sub>Si(E-CF=CFCF<sub>3</sub>) (a.4)

Z-HFC-1225ye (1.8 mL, 18.0 mmol), <sup>n</sup>BuLi (2.5 M, 7.2 mL, 18.0 mmol), and <sup>n</sup>Bu(Me)<sub>2</sub>SiCl (2.0 mL, 12.0 mmol). The product was isolated as a yellow liquid after work up using (G.P1). Yield (2.0 g, 8.0 mmol, 66 %). Anal.Calcd for C<sub>9</sub>H<sub>15</sub>F<sub>5</sub>Si: C, 43.89; H, 6.14 %. Found: C, 43.55; H, 6.02 %. <sup>19</sup>F{<sup>1</sup>H} NMR (376 MHz, CDCl<sub>3</sub>, 291K) δ ppm: -67.62 (d.d, 3F, <sup>3</sup>J(CF<sub>3</sub> F<sub>trans</sub>) = 13.7 Hz, <sup>4</sup>J(CF<sub>3</sub> F<sub>gem</sub>) = 6.5 Hz, CF<sub>3</sub>), -137.26 (q.d, 1F, <sup>4</sup>J(F<sub>gem</sub> 3F) = 6.8 Hz, <sup>3</sup>J(F<sub>gem</sub> F<sub>trans</sub>) = 12.2 Hz, F<sub>gem</sub>), -141.89 (q.d, 1F, <sup>3</sup>J(F<sub>trans</sub> 3F) = 13.2 Hz, <sup>3</sup>J(F<sub>trans</sub> F<sub>gem</sub>) = 12.8 Hz, F<sub>trans</sub>). <sup>1</sup>H NMR (400 MHz, CDCl<sub>3</sub>, 291 K) δ ppm: 0.23 (s, 6H, CH<sub>3</sub>-Si), 0.72 (t, 2H, <sup>3</sup>J(CH<sub>2</sub> CH<sub>3</sub>) = 6.5 Hz, CH<sub>2</sub>), 0.86 (q, 3H, <sup>3</sup>J(CH<sub>3</sub> CH<sub>2</sub>) = 6.8 Hz, CH<sub>3</sub>), 1.31 (m, 4H, CH<sub>2</sub>CH<sub>2</sub>). <sup>13</sup>C{<sup>1</sup>H} NMR (100 MHz, CDCl<sub>3</sub>, 298 K) δ ppm: -4.24 (s, CH<sub>3</sub>-Si), 13.27 (s, CH<sub>2</sub>), 13.66 (s, CH<sub>3</sub>), 25.37 (s, CH<sub>2</sub>), 26.10 (s, CH<sub>2</sub>), 119.40 (q.d.d, <sup>1</sup>J(C<sub>3</sub> 3F) = 270.0 Hz, <sup>2</sup>J(C<sub>3</sub> F<sub>trans</sub>) = 36.8 Hz, <sup>3</sup>J(C<sub>3</sub> F<sub>gem</sub>) = 10.4 Hz, C<sub>3</sub>), 145.60 (d.q.d, <sup>1</sup>J(C<sub>2</sub> F<sub>trans</sub>) = 270.8 Hz, <sup>2</sup>J(C<sub>2</sub> 3F) = 39.8 Hz, <sup>2</sup>J(C<sub>2</sub> F<sub>gem</sub>) = 20.0 Hz, C<sub>2</sub>), 158.50 (d.q.d, <sup>1</sup>J(C<sub>1</sub> F<sub>gem</sub>) = 287.5 Hz, <sup>3</sup>J(C<sub>1</sub> 3F) = 4.8 Hz, <sup>2</sup>J(C<sub>1</sub> F<sub>trans</sub>) = 1.8 Hz, C<sub>1</sub>). <sup>29</sup>Si{<sup>1</sup>H} NMR (79 MHz, CDCl<sub>3</sub>, 298 K) δ ppm: 1.05 (d, <sup>1</sup>J(Si F<sub>gem</sub>) = 26.4 Hz). ν<sub>max</sub>/cm<sup>-1</sup> 1295 (C-Si, m), 1380, 1465 (C-F, str), 1660 (C=C, w), 2960, 2925, 2870 (C-H, str).

### 1-1-5. Synthesis of (Me)<sub>2</sub>PhSi(E-CF=CFCF<sub>3</sub>) (a.5)

Z-HFC-1225ye (1.6 mL, 16.0 mmol), <sup>n</sup>BuLi (2.5 M, 6.4 mL, 16.0 mmol), and (Me)<sub>2</sub>PhSiCl (1.6 mL, 10.0 mmol). The product was isolated as a yellow liquid after work up using (G.P1). Yield (1.5 g, 5.6 mmol, 56 %). Anal.Calcd for C<sub>11</sub>H<sub>11</sub>F<sub>5</sub>Si: C, 49.61; H, 4.17 %. Found: C, 49.31; H, 3.90 %. <sup>19</sup>F{<sup>1</sup>H} NMR (376 MHz, CDCl<sub>3</sub>) δ ppm: -67.36 (d.d, 3F, <sup>4</sup>J(CF<sub>3</sub> F<sub>trans</sub>) = 13.2 Hz, <sup>3</sup>J(CF<sub>3</sub> F<sub>gem</sub>) = 6.3 Hz, CF<sub>3</sub>), -136.30 (q.d, 1F, <sup>3</sup>J(F<sub>gem</sub> F<sub>trans</sub>) = 12.9 Hz, <sup>3</sup>J(F<sub>trans</sub> CF<sub>3</sub>) = 6.2 Hz, F<sub>gem</sub>), -140.89 (q.d, 1F, <sup>3</sup>J(F<sub>trans</sub> CF<sub>3</sub>) = 13.2 Hz, <sup>3</sup>J(F<sub>trans</sub> F<sub>gem</sub>) = 12.9 Hz, F<sub>trans</sub>). <sup>1</sup>H NMR (400 MHz, CDCl<sub>3</sub>, 291 K) δ ppm: 0.46 (s, 6H, CH<sub>3</sub>-Si), 7.30-7.43 (m, 5H, Ph). <sup>13</sup>C{<sup>1</sup>H} NMR (100 MHz, CDCl<sub>3</sub>, 298 K) δ ppm: -4.39 (s, CH<sub>3</sub>-Si), 118.70 (q.d.d, <sup>1</sup>J(C<sub>3</sub> 3F) = 270.0 Hz, <sup>2</sup>J(C<sub>3</sub> F<sub>trans</sub>) = 36.5 Hz, <sup>3</sup>J(C<sub>3</sub> F<sub>gem</sub>) = 10.4 Hz, C<sub>3</sub>), 127.52 (s, Ph), 129.63 (s, Ph), 132.78 (s, Ph), 132.97 (s, Ph), 145.45 (d.q.d, <sup>1</sup>J(C<sub>2</sub> F<sub>trans</sub>) = 271.6 Hz, <sup>2</sup>J(C<sub>2</sub> 3F) = 40.7 Hz, <sup>2</sup>J(C<sub>2</sub> F<sub>gem</sub>) = 19.9 Hz, C<sub>2</sub>), 157.80 (d.q, <sup>1</sup>J(C<sub>1</sub> F<sub>gem</sub>) = 286.9 Hz, <sup>3</sup>J(C<sub>1</sub> 3F) = 4.5 Hz, C<sub>1</sub>). <sup>29</sup>Si{<sup>1</sup>H} NMR (79 MHz, CDCl<sub>3</sub>, 298 K) δ ppm: -6.40 (d, <sup>1</sup>J(Si F<sub>gem</sub>) = 28.7 Hz). ν<sub>max</sub>/cm<sup>-1</sup> 1260 (C-Si, m), 1360, 1430 (C-F, str), 1660 (C=C, w), 3070 (C-H, m).

### 1-1-6. Synthesis of (Ph)<sub>2</sub>MeSi(E-CF=CFCF<sub>3</sub>) (a.6)

Z-HFC-1225ye (1.5 mL, 14.0 mmol), <sup>n</sup>BuLi (2.5 M, 5.6 mL, 14.0 mmol), and (Ph)<sub>2</sub>MeSiCl (1.8 mL, 9.0 mmol). The product was isolated as a yellow liquid after work up using (G.P1). Yield (1.5 g, 4.5 mmol, 50 %). Anal.Calcd for C<sub>16</sub>H<sub>13</sub>F<sub>5</sub>Si: C, 58.52; H, 3.99 %. Found: C, 58.59; H, 4.07 %. <sup>19</sup>F{<sup>1</sup>H} NMR (376 MHz, CDCl<sub>3</sub>, 291 K) δ ppm: -67.06 (d.d, 3F, <sup>3</sup>J(CF<sub>3</sub> F<sub>trans</sub>) = 13.7 Hz, <sup>4</sup>J(CF<sub>3</sub> F<sub>gem</sub>) = 6.2 Hz, CF<sub>3</sub>), -134.12 (q.d, 1F, <sup>3</sup>J(F<sub>gem</sub> F<sub>trans</sub>) = 12.2 Hz, <sup>4</sup>J(F<sub>gem</sub> CF<sub>3</sub>) = 6.1 Hz, F<sub>gem</sub>), -138.22 (q.d, 1F, <sup>3</sup>J(F<sub>trans</sub> CF<sub>3</sub>) = 13.0 Hz, <sup>3</sup>J(F<sub>trans</sub> F<sub>gem</sub>) = 12.5 Hz, F<sub>trans</sub>). <sup>1</sup>H NMR (400 MHz, CDCl<sub>3</sub>, 291 K) δ ppm: 1.18 (s, 3H, CH<sub>3</sub>-Si), 7.34-7.48 (m, 10H, Ph). <sup>13</sup>C{<sup>1</sup>H} NMR (100 MHz, CDCl<sub>3</sub>, 298 K) δ ppm: -3.82 (s, CH<sub>3</sub>-Si), 119.00 (q.d.d, <sup>1</sup>J(C<sub>3</sub> 3F) = 270.4 Hz, <sup>2</sup>J(C<sub>3</sub> F<sub>trans</sub>) = 36.6 Hz, <sup>3</sup>J(C<sub>3</sub> F<sub>gem</sub>) = 9.9 Hz, C<sub>3</sub>), 128.27 (s, Ph), 130.58 (s, Ph), 131.33 (s, Ph), 134.83 (s, Ph), 147.00 (d.q.d, <sup>1</sup>J(C<sub>2</sub> F<sub>trans</sub>) = 273.7 Hz, <sup>2</sup>J(C<sub>2</sub> 3F) = 40.5 Hz, <sup>2</sup>J(C<sub>2</sub> F<sub>gem</sub>) = 20.7 Hz, C<sub>2</sub>), 155.80 (d.q, <sup>1</sup>J(C<sub>1</sub> F<sub>gem</sub>) = 286.1 Hz, <sup>3</sup>J(C<sub>1</sub> 3F) = 4.4 Hz, C<sub>1</sub>). <sup>29</sup>Si{<sup>1</sup>H} NMR (79 MHz, CDCl<sub>3</sub>, 298 K) δ ppm: -12.28 (d, <sup>1</sup>J(Si F<sub>gem</sub>) = 28.8 Hz). ν<sub>max</sub>/cm<sup>-1</sup> 1260 (C-Si, m), 1350, 1430 (C-F, str), 1600 (C=C, w), 3070 (C-H, m).

### 1-1-7. Synthesis of (Me)<sub>2</sub>Si(E-CF=CFCF<sub>3</sub>)<sub>2</sub> (a.7)

Z-HFC- 225ye (4.7 mL, 12.0 mmol), <sup>n</sup>BuLi (2.5 M, 4.8 mL, 12.0 mmol), and (Me)<sub>2</sub>SiCl<sub>2</sub> (0.5 mL, 4.0 mmol). The product was isolated as a yellow liquid after purification by column chromatography on silica with (1:1) diethyl ether : hexane eluent. Yield (0.9 g, 2.8 mmol, 70 %). <sup>19</sup>F{<sup>1</sup>H} NMR (376 MHz, CDCl<sub>3</sub>, 291 K) δ ppm: -68.83 (d.d, 6F, <sup>3</sup>J(CF<sub>3</sub> F<sub>trans</sub>) = 13.2 Hz, <sup>4</sup>J(CF<sub>3</sub> F<sub>gem</sub>) = 5.4 Hz, CF<sub>3</sub>), -137.75 (q.d, 2F, <sup>4</sup>J(F<sub>gem</sub> CF<sub>3</sub>) = 5.8 Hz, <sup>3</sup>J(F<sub>gem</sub> F<sub>trans</sub>) = 12.7 Hz, F<sub>gem</sub>), -140.36 (m, 2F, F<sub>trans</sub>). <sup>1</sup>H NMR (400 MHz, CDCl<sub>3</sub>, 291 K) δ ppm: 0.63 (s, 6H, CH<sub>3</sub>). <sup>13</sup>C{<sup>1</sup>H} NMR (100 MHz, CDCl<sub>3</sub>, 298 K) δ ppm: 10.75 (s, CH<sub>3</sub>), 118.00 (q.d.d, <sup>1</sup>J(C<sub>3</sub> 3F) = 271.1 Hz, <sup>2</sup>J(C<sub>3</sub> F<sub>trans</sub>) = 37.2 Hz, <sup>3</sup>J(C<sub>3</sub> F<sub>gem</sub>) = 9.8 Hz, C<sub>3</sub>), 145.00 (m, C<sub>2</sub>), 152.00 (d.m, <sup>1</sup>J(C<sub>1</sub> F<sub>gem</sub>) = 286.1 Hz, C<sub>1</sub>). <sup>29</sup>Si{<sup>1</sup>H} NMR (79 MHz, CDCl<sub>3</sub>, 298 K) δ ppm: -21.00 (m). ν<sub>max</sub>/cm<sup>-1</sup> 1260 (C-Si, m), 1360 (C-F, str), 1670 (C=C, w), 2960 (C-H, str).

### 1-1-8. Synthesis of (<sup>i</sup>Pr)<sub>2</sub>Si(E-CF=CFCF<sub>3</sub>)<sub>2</sub> (a.8)

Z-HFC-1225ye (6.6 mL, 50.0 mmol), <sup>n</sup>BuLi (2.5 M, 20.0 mL, 50.0 mmol), and (<sup>i</sup>Pr)<sub>2</sub>SiCl<sub>2</sub> (2.8 mL, 16.0 mmol). The product was isolated as a yellow liquid after purification by column chromatography on silica with (1:1) diethyl ether : hexane eluent. Yield (2.0 g, 5.0 mmol, 31 %). <sup>19</sup>F{<sup>1</sup>H} NMR (376 MHz, CDCl<sub>3</sub>, 291 K) δ ppm: -68.97 (d.d, 6F, <sup>3</sup>J(CF<sub>3</sub> F<sub>trans</sub>) = 14.1 Hz, <sup>4</sup>J(CF<sub>3</sub> F<sub>gem</sub>) = 5.8 Hz, CF<sub>3</sub>), -136.95 (q.d, 2F, <sup>4</sup>J(F<sub>gem</sub> CF<sub>3</sub>) = 4.8 Hz, <sup>3</sup>J(F<sub>gem</sub> F<sub>trans</sub>) = 12.7 Hz, F<sub>gem</sub>), -138.54 (m, 2F, F<sub>trans</sub>). <sup>1</sup>H NMR (400 MHz, CDCl<sub>3</sub>, 291 K) δ ppm: 1.07 (d, 12H, <sup>3</sup>J(CH<sub>3</sub> CH) = 7.5 Hz, CH<sub>3</sub>), 1.45 (septet, 2H, <sup>3</sup>J(CH CH<sub>3</sub>) = 7.4 Hz, CH). <sup>13</sup>C{<sup>1</sup>H} NMR (100 MHz, CDCl<sub>3</sub>, 298 K) δ ppm: 10.75 (s, CH-Si), 15.43 (s, CH<sub>3</sub>), 118.70 (q.d.d, <sup>1</sup>J(C<sub>3</sub> 3F) = 270.5 Hz, <sup>2</sup>J(C<sub>3</sub> F<sub>trans</sub>) = 36.8 Hz, <sup>3</sup>J(C<sub>3</sub> F<sub>gem</sub>) = 9.7 Hz, C<sub>3</sub>), 147.55 (d.q.d, <sup>1</sup>J(C<sub>2</sub> F<sub>trans</sub>) = 274.4 Hz, <sup>2</sup>J(C<sub>2</sub> 3F) = 41.0 Hz, <sup>2</sup>J(C<sub>2</sub> F<sub>gem</sub>) = 19.2 Hz, C<sub>2</sub>), 152.70 (m, overlap, C<sub>1</sub>). <sup>29</sup>Si{<sup>1</sup>H} NMR (79 MHz, CDCl<sub>3</sub>, 298 K) δ ppm: -1.57 (m). ν<sub>max</sub>/cm<sup>-1</sup> 2870, 2950 (C-H, str), 1650 (C=C, w), 1250 (C-Si, m), 1360, 1390, 1460 (C-F, str).

### 1-1-9. Synthesis of (Ph)<sub>2</sub>Si(E-CF=CFCF<sub>3</sub>)<sub>2</sub> (a.9)

Z-HFC-1225ye (4.5 mL, 45.0 mmol), <sup>n</sup>BuLi (2.5 M, 18.0 mL, 45.0 mmol), Ph<sub>2</sub>SiCl<sub>2</sub> (3.0 mL, 15.0 mmol). The product was isolated as a light brown solid after work up and purification by column chromatography on silica with (1:1) diethyl ether: hexane eluent. Yield (1.9 g, 4.3 mmol, 28 %) M.P (98-100 °C). Anal.Calcd for C<sub>18</sub>H<sub>10</sub>F<sub>10</sub>Si: C, 48.64; H, 2.27 %.

Found: C, 48.23; H, 2.24 %.  $^{19}\text{F}\{^1\text{H}\}$  NMR (376 MHz,  $\text{CDCl}_3$ , 291 K)  $\delta$  ppm: -67.95 (d.d.d, 6F,  $^3J(\text{CF}_3 \text{ F}_{\text{trans}}) = 13.0$  Hz,  $^4J(\text{CF}_3 \text{ F}_{\text{gem}}) = 4.5$  Hz,  $J(\text{CF}_3 \text{ F}_{\text{external}}) = 3.9$  Hz,  $\text{CF}_3$ ), -133.95 (q.d, 2F,  $^4J(\text{F}_{\text{gem}} \text{ CF}_3) = 5.5$  Hz,  $^3J(\text{F}_{\text{gem}} \text{ F}_{\text{trans}}) = 13.1$  Hz,  $\text{F}_{\text{gem}}$ ), -136.94 (m, 2F,  $\text{F}_{\text{trans}}$ ).  $^1\text{H}$  NMR (400 MHz,  $\text{CDCl}_3$ , 291 K)  $\delta$  ppm: 7.39-7.41 (m, 10H, Ph).  $^{13}\text{C}\{^1\text{H}\}$  NMR (100 MHz,  $\text{CDCl}_3$ , 298 K)  $\delta$  ppm: 118.50 (q.d.d,  $^1J(\text{C}_3 \text{ 3F}) = 271.6$  Hz,  $^2J(\text{C}_3 \text{ F}_{\text{trans}}) = 36.2$  Hz,  $^3J(\text{C}_3 \text{ F}_{\text{gem}}) = 9.4$  Hz,  $\text{C}_3$ ), 125.50 (s, Ph), 128.58 (s, Ph), 131.78 (s, Ph), 135.49 (s, Ph), 147.80 (d.q.d,  $^1J(\text{C}_2 \text{ F}_{\text{trans}}) = 277.8$  Hz,  $^3J(\text{C}_2 \text{ 3F}) = 40.7$  Hz,  $^2J(\text{C}_2 \text{ F}_{\text{gem}}) = 20.1$  Hz,  $\text{C}_2$ ), 150.80 (d,  $^1J(\text{C}_1 \text{ F}_{\text{gem}}) = 284.1$  Hz,  $\text{C}_1$ ).  $^{29}\text{Si}\{^1\text{H}\}$  NMR (79 MHz,  $\text{CDCl}_3$ , 298 K)  $\delta$  ppm: -23.20 (m).  $\nu_{\text{max}}/\text{cm}^{-1}$  3070 (C-H, str), 1665 (C=C, w), 1490, 1430 (C-F, str), 1200 (C-Si, m).

### 1-1-10. Synthesis of $\text{PhSi}(\text{E-CF}=\text{CFCF}_3)_3$ (a.10)

Z-HFC-1225ye (2.7 mL, 27.0 mmol),  $^n\text{BuLi}$  (2.5 M, 10.8 mL, 27.0 mmol), and  $\text{PhSiCl}_3$  (0.9 mL, 6.0 mmol). The product was isolated as a brown liquid after work up using (G.P1). Yield (2.0 g, 4.0 mmol, 66 %). Anal.Calcd for  $\text{C}_{15}\text{H}_5\text{F}_{15}\text{Si}$ : C, 36.17; H, 1.01 %. Found: C, 36.14; H, 1.01 %.  $^{19}\text{F}\{^1\text{H}\}$  NMR (376 MHz,  $\text{CDCl}_3$ , 291 K)  $\delta$  ppm: -69.31 (broad.d, 9F,  $^3J(\text{CF}_3 \text{ F}_{\text{trans}}) = 13.4$  Hz,  $\text{CF}_3$ ), -131.04 (d.q, 3F,  $^4J(\text{F}_{\text{gem}} \text{ CF}_3) = 5.9$  Hz,  $^3J(\text{F}_{\text{gem}} \text{ F}_{\text{trans}}) = 13.5$  Hz,  $\text{F}_{\text{gem}}$ ), -141.08 (m, 3F,  $\text{F}_{\text{trans}}$ ).  $^1\text{H}$  NMR (400 MHz,  $\text{CDCl}_3$ , 291 K)  $\delta$  ppm: 7.40-7.51 (m, 5H, Ph).  $^{13}\text{C}\{^1\text{H}\}$  NMR (100 MHz,  $\text{CDCl}_3$ , 298 K)  $\delta$  ppm: 118.50 (q.d.d,  $^1J(\text{C}_3 \text{ 3F}) = 271.2$  Hz,  $^2J(\text{C}_3 \text{ F}_{\text{trans}}) = 36.6$  Hz,  $^3J(\text{C}_3 \text{ F}_{\text{gem}}) = 9.0$  Hz,  $\text{C}_3$ ), 120.95 (s, Ph), 128.74 (s, Ph), 132.73 (s, Ph), 134.84 (s, Ph), 148.50 (d.q.d,  $^1J(\text{C}_2 \text{ F}_{\text{trans}}) = 281.4$  Hz,  $^2J(\text{C}_2 \text{ 3F}) = 40.9$  Hz,  $^2J(\text{C}_2 \text{ F}_{\text{gem}}) = 19.6$  Hz,  $\text{C}_2$ ), 147.00 (d,  $^1J(\text{C}_1 \text{ F}_{\text{gem}}) = 283.0$  Hz,  $\text{C}_1$ ).  $^{29}\text{Si}\{^1\text{H}\}$  NMR (79 MHz,  $\text{CDCl}_3$ , 298 K)  $\delta$  ppm: -28.00 (m).  $\nu_{\text{max}}/\text{cm}^{-1}$  1380, 1430 (C-F, str), 1245 (C-Si, m), 1670 (C=C, w).

### 1-1-11. Synthesis of $\text{Si}(\text{E-CF}=\text{CFCF}_3)_4$ (a.11)

Z-HFC-1225ye (6.0 mL, 57.0 mmol),  $^n\text{BuLi}$  (2.5 M, 22.8 mL, 57.0 mmol), and  $\text{SiCl}_4$  (1.0 mL, 9.5 mmol), the product was analysed in solution because it could not be isolated from the solvent.  $^{19}\text{F}\{^1\text{H}\}$  NMR (376 MHz,  $\text{CDCl}_3$ , 291 K)  $\delta$  ppm: -70.05 (d.m, 12F,  $^3J(\text{CF}_3 \text{ F}_{\text{trans}}) = 16.1$  Hz,  $\text{CF}_3$ ), -127.32 (q.d, 4F,  $^4J(\text{F}_{\text{gem}} \text{ CF}_3) = 6.5$  Hz,  $^3J(\text{F}_{\text{gem}} \text{ F}_{\text{trans}}) = 13.0$  Hz,  $\text{F}_{\text{gem}}$ ), -145.45 (m, 4F,  $\text{F}_{\text{trans}}$ ).  $^{13}\text{C}\{^1\text{H}\}$  NMR (100 MHz,  $\text{CDCl}_3$ , 298 K)  $\delta$  ppm: 118.50 (q,  $^1J(\text{C}_3 \text{ 3F}) = 270.0$  Hz,  $\text{C}_3$ ), 148.20 (m,  $\text{C}_2$ ), 137.80 (d.q,  $^1J(\text{C}_1 \text{ F}_{\text{gem}}) = 263.2$  Hz,  $^3J(\text{C}_1 \text{ 3F}) = 5.6$  Hz,  $\text{C}_1$ ).  $^{29}\text{Si}\{^1\text{H}\}$  NMR (79 MHz,  $\text{CDCl}_3$ , 298 K)  $\delta$  ppm: -67.37 (m).  $\nu_{\text{max}}/\text{cm}^{-1}$  1295 (C-Si, m), 1360, 1465 (C-F, str), 1670 (C=C, w).

## 2. $\text{R}_{4-n}\text{Si}(\text{E-CF}=\text{CFCF}_3)_n$ Reactions

### 2-1. General Substitution Reactions (G.P2)

A solution of dry THF (150 mL) and  $\text{R}_{4-n}\text{Si}(\text{CF}_3\text{CF}=\text{CF})_n$  was placed in a three-necked round-bottom flask under a positive pressure of nitrogen. The solution was cooled to  $-30$  °C, and then RLi (solution in hexanes) was added slowly. The mixture was slowly warmed to room temperature and left stirring for 24 hours. The reaction was worked up with hexanes (10 mL), followed by filtration through celite, and solvent was removed using a rotary evaporator.

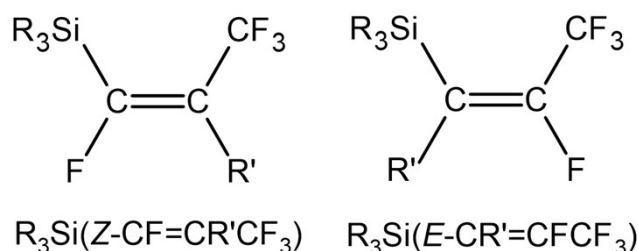

Figure 2 Skeleton of general structure of *E* and *Z* isomers ( (R= Me, Et,  $^n\text{Bu}$ ,  $^i\text{Pr}$ , Ph, and R' =  $^n\text{Bu}$ ,  $^i\text{Bu}$ , Me, Ph)

### 2-1-1. Reaction between $\text{Et}_3\text{Si}(\text{E-CF}=\text{CFCF}_3)$ (a.1) and $^n\text{BuLi}$

$\text{Et}_3\text{Si}(\text{E-CF}=\text{CFCF}_3)$  (a.1) (1.0 g, 4.0 mmol) was dissolved in dry THF (150 mL),  $^n\text{BuLi}$  (2.5 M, 3.2 mL, 8.0 mmol) was added slowly. The product was isolated as a black liquid after work up using (G.P2). Yield (0.8 g, 2.8 mmol, 70 %); ratio *Z*:*E* [ $\text{Et}_3\text{Si}(\text{Z-CF}=\text{C}^n\text{BuCF}_3)$  (12*Z*) 88 :  $\text{Et}_3\text{Si}(\text{E-C}^n\text{Bu}=\text{CFCF}_3)$  (12*E*) 12]. Anal.Calcd for  $\text{C}_{13}\text{H}_{24}\text{F}_4\text{Si}$ : C, 54.90; H, 8.51 %. Found: C, 54.55; H, 8.23 %.  $^{19}\text{F}\{^1\text{H}\}$  NMR (376 MHz,  $\text{CDCl}_3$ , 291 K)  $\delta$  ppm:  $\text{Et}_3\text{Si}(\text{Z-CF}=\text{C}^n\text{BuCF}_3)$  -60.28 (d, 3F,  $^4J(\text{CF}_3 \text{ F}_{\text{gem}}) = 8.6$  Hz,  $\text{CF}_3$ ), -99.31 (q, 1F,  $^4J(\text{F CF}_3) = 8.2$  Hz,  $\text{F}_{\text{gem}}$ ) and  $\text{Et}_3\text{Si}(\text{E-C}^n\text{Bu}=\text{CFCF}_3)$  -67.34 (d, 3F,  $^3J(\text{CF}_3 \text{ F}_{\text{trans}}) = 10.6$  Hz,

CF<sub>3</sub>), -106.75 (q, 1F, <sup>3</sup>J(F<sub>trans</sub> CF<sub>3</sub>) = 10.9 Hz, F<sub>trans</sub>). <sup>1</sup>H NMR (400 MHz, CDCl<sub>3</sub>, 291 K) δ ppm: Et<sub>3</sub>Si(Z-CF=C<sup>n</sup>BuCF<sub>3</sub>) and Et<sub>3</sub>Si(E-C<sup>n</sup>Bu=CFCF<sub>3</sub>) 0.45 (q, 6H, <sup>3</sup>J(CH<sub>2</sub> CH<sub>3</sub>) = 8.2 Hz, Si-CH<sub>2</sub>), 0.49 (q, 6H, <sup>3</sup>J(CH<sub>2</sub> CH<sub>3</sub>) = 7.9 Hz, Si-CH<sub>2</sub>), 0.68 (t, 9H, <sup>3</sup>J(CH<sub>3</sub> CH<sub>2</sub>) = 7.8 Hz, CH<sub>3</sub>), 0.77 (t, 9H, <sup>3</sup>J(CH<sub>3</sub> CH<sub>2</sub>) = 7.4 Hz, CH<sub>3</sub>), 0.80 (t, 3H, <sup>3</sup>J(CH<sub>3</sub> CH<sub>2</sub>) = 7.8 Hz, CH<sub>3</sub>), 0.81 (t, 3H, <sup>3</sup>J(CH<sub>3</sub> CH<sub>2</sub>) = 7.6 Hz, CH<sub>3</sub>), 1.25-1.43 (m, 12H, -CH<sub>2</sub>CH<sub>2</sub>-), 2.14 (t, 2H, <sup>3</sup>J(CH<sub>2</sub> CH<sub>2</sub>) = 7.3 Hz, CH<sub>2</sub>-C=), 2.86 (t, 2H, <sup>3</sup>J(CH<sub>2</sub> CH<sub>2</sub>) = 7.9 Hz, CH<sub>2</sub>-C=). <sup>13</sup>C{<sup>1</sup>H} NMR (100 MHz, CDCl<sub>3</sub>, 298 K) δ ppm: Et<sub>3</sub>Si(Z-CF=C<sup>n</sup>BuCF<sub>3</sub>) and Et<sub>3</sub>Si(E-C<sup>n</sup>Bu=CFCF<sub>3</sub>): 1.82 (s, Si-CH<sub>2</sub>), 2.61 (s, Si-CH<sub>2</sub>), 6.05 (s, CH<sub>3</sub>), 6.31 (s, CH<sub>3</sub>), 10.10 (s, =C-CH<sub>2</sub>), 12.68 (s, =C-CH<sub>2</sub>), 21.86 (s, CH<sub>3</sub>), 21.68 (s, CH<sub>3</sub>), 25.30 (s, -CH<sub>2</sub>CH<sub>2</sub>-), 25.93 (s, CH<sub>2</sub>CH<sub>2</sub>), 30.00 (s, -CH<sub>2</sub>CH<sub>2</sub>-), Et<sub>3</sub>Si(Z-CF=C<sup>n</sup>BuCF<sub>3</sub>) 124.50 (q.d, <sup>1</sup>J(C<sub>3</sub> 3F) = 272.7 Hz, <sup>3</sup>J(C<sub>3</sub> F<sub>gem</sub>) = 24.3 Hz, C<sub>3</sub>), 127.30 (q.d, <sup>3</sup>J(C<sub>2</sub> 3F) = 28.7 Hz, <sup>2</sup>J(C<sub>2</sub> F<sub>gem</sub>) = 18.6 Hz, C<sub>2</sub>), 171.60 (d.q, <sup>1</sup>J(C<sub>1</sub> F<sub>gem</sub>) = 288.0 Hz, <sup>3</sup>J(C<sub>1</sub> 3F) = 6.6 Hz); Et<sub>3</sub>Si(E-C<sup>n</sup>Bu=CFCF<sub>3</sub>), 118.00 (q.d, <sup>1</sup>J(C<sub>3</sub> 3F) = 272.7 Hz, <sup>2</sup>J(C<sub>3</sub> F<sub>trans</sub>) = 50.7 Hz), 119.75 (d, <sup>2</sup>J(C<sub>1</sub> F<sub>trans</sub>) = 8.7 Hz, C<sub>1</sub>), 147.00 (d.q, <sup>1</sup>J(C<sub>2</sub> F<sub>trans</sub>) = 267.6 Hz, <sup>2</sup>J(C<sub>2</sub> 3F) = 39.5 Hz, C<sub>2</sub>). <sup>29</sup>Si{<sup>1</sup>H} NMR (79 MHz, CDCl<sub>3</sub>, 298 K) δ ppm: Et<sub>3</sub>Si(Z-CF=C<sup>n</sup>BuCF<sub>3</sub>) 6.20 (d, <sup>2</sup>J(Si F<sub>gem</sub>) = 31.2 Hz); Et<sub>3</sub>Si(E-C<sup>n</sup>Bu=CFCF<sub>3</sub>), 4.96 (d, <sup>3</sup>J(Si F<sub>trans</sub>) = 9.4 Hz). ν<sub>max</sub>/cm<sup>-1</sup> 1300 (CF<sub>3</sub>, srt), 1460, 1360 (C-F, m), 2850, 2920, 2960(C-H, w).

### 2-1-2. Reaction between Et<sub>3</sub>Si(E-CF=CFCF<sub>3</sub>) (a.1) and <sup>t</sup>BuLi

Et<sub>3</sub>Si(E-CF=CFCF<sub>3</sub>) (a.1) (1.0 g, 4.0 mmol) was dissolved in dry THF (150 mL), <sup>t</sup>BuLi (1.7 M, 7.7 mL, 8.0 mmol) was added slowly. The product was isolated as a black liquid after work up using (G.P2). Yield (0.5 g, 1.7 mmol, 42 %). Anal.Calcd for C<sub>13</sub>H<sub>24</sub>F<sub>4</sub>Si: C, 54.90; H, 8.51 %. Found: C, 54.89; H, 8.03 %. <sup>19</sup>F{<sup>1</sup>H} NMR (376 MHz, CDCl<sub>3</sub>, 291 K) δ ppm -55.85 (d, 3F, <sup>4</sup>J(CF<sub>3</sub> F<sub>gem</sub>) = 7.4 Hz, CF<sub>3</sub>), -87.06 (q, 1F, <sup>4</sup>J(F<sub>gem</sub> CF<sub>3</sub>) = 7.1 Hz, F<sub>gem</sub>). <sup>1</sup>H NMR (400 MHz, CDCl<sub>3</sub>, 291 K) δ ppm: 0.66 (q, 6H, <sup>3</sup>J(CH<sub>3</sub> CH<sub>2</sub>) = 7.1 Hz, Si-CH<sub>2</sub>), 0.89 (t, 9H, <sup>3</sup>J(CH<sub>3</sub> CH<sub>2</sub>) = 7.7 Hz, CH<sub>3</sub>), 1.21 (s, 9H, (CH<sub>3</sub>)<sub>3</sub>-C). <sup>13</sup>C{<sup>1</sup>H} NMR (100 MHz, CDCl<sub>3</sub>, 298 K) δ ppm: 2.29 (s, Si-CH<sub>2</sub>), 6.23 (s, CH<sub>3</sub>), 28.90 (s, =C-C-(CH<sub>3</sub>)<sub>3</sub>), 28.94 (s, C-(CH<sub>3</sub>)<sub>3</sub>), 124.50 (q.d, <sup>1</sup>J(C<sub>3</sub> 3F) = 273.0 Hz, <sup>3</sup>J(C<sub>3</sub> F<sub>gem</sub>) = 27.9 Hz, C<sub>3</sub>), 132.92 (q.d, <sup>2</sup>J(C<sub>2</sub> 3F) = 24.8 Hz, <sup>2</sup>J(C<sub>2</sub> F<sub>gem</sub>) = 12.8 Hz), 173.60 (d.q, <sup>1</sup>J(C<sub>1</sub> F<sub>gem</sub>) = 293.0 Hz, <sup>3</sup>J(C<sub>1</sub> 3F) = 9.5 Hz). <sup>29</sup>Si{<sup>1</sup>H} NMR (79 MHz, CDCl<sub>3</sub>, 298 K) δ ppm: 8.70 (d, <sup>2</sup>J(Si F<sub>gem</sub>) = 32.8 Hz). ν<sub>max</sub>/cm<sup>-1</sup> 1230 (C-Si, m), 1320, 1365 (C-F, str), 1600 (C=C, w), 2870, 2920 (C-H, w).

### 2-1-3. Reaction between Et<sub>3</sub>Si(E-CF=CFCF<sub>3</sub>) (a.1) and MeLi

Et<sub>3</sub>Si(E-CF=CFCF<sub>3</sub>) (a.1) (1.0 g, 4.0 mmol) was dissolved in dry diethyl ether (150 mL), MeLi (1.6 M, 12.5 mL, 20.0 mmol) was added slowly. The product was isolated as a black liquid after work up using (G.P2). Yield (0.7 g, 2.8 mmol, 70 %); ratio Z:E [Et<sub>3</sub>Si(Z-CF=CMeCF<sub>3</sub>) (14Z) 79 : Et<sub>3</sub>Si(E-CMe=CFCF<sub>3</sub>) (14E) 21]. Anal.Calcd for C<sub>10</sub>H<sub>18</sub>F<sub>4</sub>Si: C, 49.56; H, 7.49 %. Found: C, 49.73; H, 7.12 %. <sup>19</sup>F{<sup>1</sup>H} NMR (376 MHz, CDCl<sub>3</sub>, 291 K) δ ppm: Et<sub>3</sub>Si(Z-CF=CMeCF<sub>3</sub>) -62.50 (d, 3F, <sup>4</sup>J(CF<sub>3</sub> F<sub>gem</sub>) = 8.6 Hz, CF<sub>3</sub>), -98.47 (q, 1F, <sup>4</sup>J(F<sub>gem</sub> CF<sub>3</sub>) = 8.7 Hz, F<sub>gem</sub>), and Et<sub>3</sub>Si(E-CMe=CFCF<sub>3</sub>) -67.07 (d, 3F, <sup>3</sup>J(CF<sub>3</sub> F<sub>trans</sub>) = 10.3 Hz, CF<sub>3</sub>), -105.47 (q, 1F, <sup>3</sup>J(F<sub>trans</sub> CF<sub>3</sub>) = 10.3 Hz, F<sub>trans</sub>). <sup>1</sup>H NMR (400 MHz, CDCl<sub>3</sub>, 291 K) δ ppm: Et<sub>3</sub>Si(Z-CF=CMeCF<sub>3</sub>), and Et<sub>3</sub>Si(E-CMe=CFCF<sub>3</sub>): 0.68 (q, 6H, <sup>3</sup>J(CH<sub>2</sub> CH<sub>3</sub>) = 7.9 Hz, Si-CH<sub>2</sub>), 0.70 (q, 6H, <sup>3</sup>J(CH<sub>2</sub> CH<sub>3</sub>) = 7.3 Hz, Si-CH<sub>2</sub>), 0.81 (t, 9H, <sup>3</sup>J(CH<sub>3</sub> CH<sub>2</sub>) = 7.8 Hz, CH<sub>3</sub>), 0.88 (t, 9H, <sup>3</sup>J(CH<sub>3</sub> CH<sub>2</sub>) = 7.6 Hz, CH<sub>3</sub>), 1.77 (s, 3H, =C-CH<sub>3</sub>), 1.79 (s, 3H, =C-CH<sub>3</sub>). <sup>13</sup>C{<sup>1</sup>H} NMR (100 MHz, CDCl<sub>3</sub>, 298 K) δ ppm: Et<sub>3</sub>Si(Z-CF=CMeCF<sub>3</sub>), and Et<sub>3</sub>Si(E-CMe=CFCF<sub>3</sub>) 1.75 (s, Si-CH<sub>2</sub>), 2.35 (s, Si-CH<sub>2</sub>), 5.35 (s, CH<sub>3</sub>), 5.78 (s, CH<sub>3</sub>), 6.1 (s, =C(CH<sub>3</sub>)<sub>3</sub>), 6.22 (s, =C(CH<sub>3</sub>)<sub>3</sub>); Et<sub>3</sub>Si(Z-CF=CMeCF<sub>3</sub>) 125.00 (q.d, <sup>1</sup>J(C<sub>3</sub> 3F) = 275.7 Hz, <sup>4</sup>J(C<sub>3</sub> F<sub>gem</sub>) = 25.2 Hz, C<sub>3</sub>), 122.30 (q.d, <sup>2</sup>J(C<sub>2</sub> 3F) = 30.4 Hz, <sup>2</sup>J(C<sub>2</sub> F<sub>gem</sub>) = 19.1 Hz, C<sub>2</sub>), 171.00 (d.q, <sup>1</sup>J(C<sub>1</sub> F<sub>gem</sub>) = 287.9 Hz, <sup>3</sup>J(C<sub>1</sub> 3F) = 6.6 Hz, C<sub>1</sub>), Et<sub>3</sub>Si(E-CMe=CFCF<sub>3</sub>): 126.50 (m, C<sub>3</sub>), 122.46 (d, <sup>2</sup>J(C<sub>1</sub> F<sub>trans</sub>) = 4.3 Hz, C<sub>1</sub>), 119.90 (m, C<sub>2</sub>). <sup>29</sup>Si{<sup>1</sup>H} NMR (79 MHz, CDCl<sub>3</sub>, 298 K) δ ppm: Et<sub>3</sub>Si(Z-CF=CMeCF<sub>3</sub>) 6.15 (d, <sup>2</sup>J(Si F<sub>gem</sub>) = 30.7 Hz); Et<sub>3</sub>Si(E-CMe=CFCF<sub>3</sub>) 8.95 (d, <sup>2</sup>J(Si F<sub>trans</sub>) = 6.8 Hz). ν<sub>max</sub>/cm<sup>-1</sup> 1260 (Si-C, m), 1335, 1380 (C-F, str), 1680 (C=C, w), 2960 (C-H, w).

### 2-1-4. Reaction between Et<sub>3</sub>Si(E-CF=CFCF<sub>3</sub>) (a.1) and PhLi

(Et<sub>3</sub>Si(E-CF=CFCF<sub>3</sub>)) (a.1) (1.0 g, 4.0 mmol) was dissolved in dry diethyl ether (150 mL), PhLi (2.0 M, 10.0 mL, 20.0 mmol) was added slowly. The product was isolated as a yellow liquid after purification by column chromatography on silica with a hexane eluent. Yield (0.9 g, 3.0 mmol, 75 %); ratio Z:E [Et<sub>3</sub>Si(Z-CF=CPhCF<sub>3</sub>) (15Z) 77 : Et<sub>3</sub>Si(E-CPh=CFCF<sub>3</sub>) (15E) 23]. Anal.Calcd for C<sub>15</sub>H<sub>20</sub>F<sub>4</sub>Si: C, 59.19; H, 6.63 %. Found: C, 59.63; H, 6.91 %. <sup>19</sup>F{<sup>1</sup>H} NMR (376 MHz, CDCl<sub>3</sub>, 291 K) δ ppm: Et<sub>3</sub>Si(Z-CF=CPhCF<sub>3</sub>) -58.61 (d, 3F, <sup>4</sup>J(CF<sub>3</sub> F<sub>gem</sub>) = 9.0 Hz, CF<sub>3</sub>), -93.33 (q, 1F, <sup>4</sup>J(F<sub>gem</sub> CF<sub>3</sub>) = 9.2 Hz, F<sub>gem</sub>), and Et<sub>3</sub>Si(E-CPh=CFCF<sub>3</sub>) -67.77 (d, 3F, <sup>3</sup>J(CF<sub>3</sub> F<sub>trans</sub>) = 10.6 Hz, CF<sub>3</sub>), -100.27 (q, 1F, <sup>4</sup>J(F<sub>trans</sub> CF<sub>3</sub>) = 10.5 Hz, F<sub>trans</sub>). <sup>1</sup>H NMR (400 MHz, CDCl<sub>3</sub>, 291 K) δ ppm: Et<sub>3</sub>Si(Z-CF=CPhCF<sub>3</sub>), and Et<sub>3</sub>Si(E-CPh=CFCF<sub>3</sub>): 0.52 (q, 6H, <sup>3</sup>J(CH<sub>2</sub> CH<sub>3</sub>) = 7.1 Hz, Si-CH<sub>2</sub>), 0.77 (q, 6H, <sup>3</sup>J(CH<sub>2</sub> CH<sub>3</sub>) = 7.8 Hz, Si-CH<sub>2</sub>), 0.82 (t, 9H, <sup>3</sup>J(CH<sub>3</sub> CH<sub>2</sub>) = 7.6 Hz, CH<sub>3</sub>), 0.96 (t, 9H,

$^3J(\text{CH}_3 \text{ CH}_2) = 7.8 \text{ Hz}$ ,  $\text{CH}_3$ ), 7.24-7.63 (m, 10H, Ph).  $^{13}\text{C}\{^1\text{H}\}$  NMR (100 MHz,  $\text{CDCl}_3$ , 298 K)  $\delta$  ppm:  $\text{Et}_3\text{Si}(\text{Z-CF}=\text{CPhCF}_3)$ , and  $\text{Et}_3\text{Si}(\text{E-CPh}=\text{CFCF}_3)$ : 2.88 (s,  $\text{CH}_3$ ), 3.98 (s,  $\text{CH}_3$ ), 7.23 (s, Si- $\text{CH}_2$ ), 7.45 (s, Si- $\text{CH}_2$ ), 126.68 (s, Ph), 127.13 (s, Ph), 127.69 (s, Ph), 128.74 (s, Ph), 128.34 (s, Ph), 128.63 (s, Ph), 134.23 (s, Ph), 129.45 (s, Ph),  $\text{Et}_3\text{Si}(\text{Z-CF}=\text{CPhCF}_3)$ : 124.00 (q.d,  $^1J(\text{C}_3 \text{ 3F}) = 270.9 \text{ Hz}$ ,  $^3J(\text{C}_3 \text{ F}_{\text{gem}}) = 20.3 \text{ Hz}$ ), 136.20 (d,  $^2J(\text{C}_2 \text{ F}_{\text{gem}}) = 10.3 \text{ Hz}$ ), 124.00 (d.q,  $^1J(\text{C}_1 \text{ F}_{\text{gem}}) = 270.9 \text{ Hz}$ ,  $^3J(\text{C}_1 \text{ 3F}) = 20.3 \text{ Hz}$ ),  $\text{Et}_3\text{Si}(\text{E-CPh}=\text{CFCF}_3)$  123.90 (m,  $\text{C}_3$ ), 147.50 (m,  $\text{C}_2$ ), 129.94 (m,  $\text{C}_1$ ).  $^{29}\text{Si}\{^1\text{H}\}$  NMR (79 MHz,  $\text{CDCl}_3$ , 298 K)  $\delta$  ppm:  $\text{Et}_3\text{Si}(\text{Z-CF}=\text{CPhCF}_3)$  7.90 (d,  $^2J(\text{Si F}_{\text{gem}}) = 30.3 \text{ Hz}$ );  $\text{Et}_3\text{Si}(\text{E-CPh}=\text{CFCF}_3)$  5.73 (d,  $^3J(\text{Si F}_{\text{trans}}) = 5.7 \text{ Hz}$ ).  $\nu_{\text{max}}/\text{cm}^{-1}$  1410 (C-F, str), 1570 (C=C, w), 2960 (C-H, w), 3365 (C-H in Ph, m).

### 2-1-5. Reaction between $^n\text{Bu}_3\text{Si}(\text{E-CF}=\text{CFCF}_3)$ (a.2) and $^n\text{BuLi}$

$^n\text{Bu}_3\text{Si}(\text{E-CF}=\text{CFCF}_3)$  (a.2) (1.3 g, 4.0 mmol) was dissolved in dry THF (150 mL),  $^n\text{BuLi}$  (2.5 M, 3.2 mL, 8.0 mmol) was added slowly, the mixture was heated to reflux for 6 h. After work up using (G.P2), the product was isolated as a yellow liquid. Yield (0.5 g, 1.4 mmol, 46 %); ratio Z:E [ $^n\text{Bu}_3\text{Si}(\text{Z-CF}=\text{C}^n\text{BuCF}_3)$  (16Z) 88 :  $^n\text{Bu}_3\text{Si}(\text{E-C}^n\text{Bu}=\text{CFCF}_3)$  (16E) 12]. Anal.Calcd for  $\text{C}_{19}\text{H}_{36}\text{F}_4\text{Si}$ : C, 61.91; H, 9.85 %. Found: C, 61.72; H, 9.68 %.  $^{19}\text{F}\{^1\text{H}\}$  NMR (376 MHz,  $\text{CDCl}_3$ , 291 K)  $\delta$  ppm:  $^n\text{Bu}_3\text{Si}(\text{Z-CF}=\text{C}^n\text{BuCF}_3)$  -60.18 (d, 3F,  $^4J(\text{CF}_3 \text{ F}_{\text{gem}}) = 8.4 \text{ Hz}$ ,  $\text{CF}_3$ ), -98.95 (q, 1F,  $^4J(\text{F}_{\text{gem}} \text{ CF}_3) = 8.5 \text{ Hz}$ ,  $\text{F}_{\text{gem}}$ ) and  $^n\text{Bu}_3\text{Si}(\text{E-C}^n\text{Bu}=\text{CFCF}_3)$  -67.22 (d, 3F,  $^3J(\text{CF}_3 \text{ F}_{\text{trans}}) = 10.6 \text{ Hz}$ ,  $\text{CF}_3$ ), -106.90 (q, 1F,  $^4J(\text{F}_{\text{trans}} \text{ CF}_3) = 10.9 \text{ Hz}$ ,  $\text{F}_{\text{trans}}$ ).  $^1\text{H}$  NMR (400 MHz,  $\text{CDCl}_3$ , 291 K)  $\delta$  ppm:  $^n\text{Bu}_3\text{Si}(\text{Z-CF}=\text{C}^n\text{BuCF}_3)$  and  $^n\text{Bu}_3\text{Si}(\text{E-C}^n\text{Bu}=\text{CFCF}_3)$  0.42 (m, 6H,  $\text{CH}_2$ -Si), 0.53 (m, 6H,  $\text{CH}_2$ -Si), 0.81-0.94 (m, 24H - $\text{CH}_3$ ), 1.23-1.55 (m, 32H, - $\text{CH}_2\text{CH}_2$ -), 2.50-2.81 (m, 4H,  $\text{CH}_2$ -C=).  $^{13}\text{C}\{^1\text{H}\}$  NMR (100 MHz,  $\text{CDCl}_3$ , 298 K)  $\delta$  ppm:  $^n\text{Bu}_3\text{Si}(\text{Z-CF}=\text{C}^n\text{BuCF}_3)$  and  $^n\text{Bu}_3\text{Si}(\text{E-C}^n\text{Bu}=\text{CFCF}_3)$ : 11.30 (s, Si- $\text{CH}_2$ ), 11.67 (s, Si- $\text{CH}_2$ ), 12.62 (s, =C- $\text{CH}_2$ -), 12.91 (s, =C- $\text{CH}_2$ -), 13.11 (s, Si- $\text{C}_3\text{H}_6$ - $\text{CH}_3$ ), 13.23 (s, Si- $\text{C}_3\text{H}_6$ - $\text{CH}_3$ ), 13.93 (s, =C- $\text{C}_3\text{H}_6$ - $\text{CH}_3$ ), 14.27 (s, =C- $\text{C}_3\text{H}_6$ - $\text{CH}_3$ ), 24.30-24.90 (overlab, - $\text{CH}_2\text{CH}_2$ -), 25.35 (s, Si- $\text{C}_2\text{H}_4$ - $\text{CH}_2$ - $\text{CH}_3$ ), 25.85 (s, Si- $\text{C}_2\text{H}_4$ - $\text{CH}_2$ - $\text{CH}_3$ ), 26.01 (s, Si- $\text{CH}_2$ - $\text{CH}_2$ ), 26.31 (s, Si- $\text{CH}_2$ - $\text{CH}_2$ ),  $^n\text{Bu}_3\text{Si}(\text{Z-CF}=\text{C}^n\text{BuCF}_3)$  124.50 (q.d,  $^1J(\text{C}_3 \text{ 3F}) = 271.4 \text{ Hz}$ ,  $^3J(\text{C}_3 \text{ F}_{\text{gem}}) = 24.1 \text{ Hz}$ ), 126.90 (q.d,  $^2J(\text{C}_2 \text{ 3F}) = 28.8 \text{ Hz}$ ,  $^3J(\text{C}_2 \text{ F}_{\text{gem}}) = 18.3 \text{ Hz}$ ), 172.0 (d.q,  $^1J(\text{C}_1 \text{ F}_{\text{gem}}) = 288.2 \text{ Hz}$ ,  $^3J(\text{C}_1 \text{ 3F}) = 6.5 \text{ Hz}$ );  $^n\text{Bu}_3\text{Si}(\text{E-C}^n\text{Bu}=\text{CFCF}_3)$  118.0 (q.d,  $^1J(\text{C}_3 \text{ 3F}) = 272.2 \text{ Hz}$ ,  $^2J(\text{C}_3 \text{ F}_{\text{gem}}) = 50.5 \text{ Hz}$ ), 120.40 (m,  $\text{C}_1$ ), 147.0 (m,  $\text{C}_2$ ).  $^{29}\text{Si}\{^1\text{H}\}$  NMR (79 MHz,  $\text{CDCl}_3$ , 298 K)  $\delta$  ppm:  $^n\text{Bu}_3\text{Si}(\text{Z-CF}=\text{C}^n\text{BuCF}_3)$  2.10 (d,  $^3J(\text{Si F}_{\text{gem}}) = 31.7 \text{ Hz}$ );  $^n\text{Bu}_3\text{Si}(\text{E-C}^n\text{Bu}=\text{CFCF}_3)$  0.93 (d,  $^3J(\text{Si F}_{\text{trans}}) = 9.3 \text{ Hz}$ ).  $\nu_{\text{max}}/\text{cm}^{-1}$  1260 (Si-C, m), 1375, 1465 (C-F, str), 1595 (C=C,w), 2950, 2920, 2870, 2860 (C-H, m).

### 2-1-6. Reaction between $^n\text{Bu}_3\text{Si}(\text{E-CF}=\text{CFCF}_3)$ (a.2) and $^t\text{BuLi}$

$^n\text{Bu}_3\text{Si}(\text{E-CF}=\text{CFCF}_3)$  (a.2) (1.3 g, 4.0 mmol) was dissolved in dry THF (150 mL),  $^t\text{BuLi}$  (1.7 M, 4.7 mL, 8.0 mmol) was added slowly. The product was isolated as a brown liquid after work up using (G.P2). Yield (0.6 g, 1.6 mmol, 53 %). Anal.Calcd for  $\text{C}_{19}\text{H}_{36}\text{F}_4\text{Si}$ : C, 61.91; H, 9.85 %. Found: C, 61.88; H, 9.68 %.  $^{19}\text{F}\{^1\text{H}\}$  NMR (376 MHz,  $\text{CDCl}_3$ , 291 K)  $\delta$  ppm: -55.55 (d, 3F,  $^4J(\text{CF}_3 \text{ F}_{\text{gem}}) = 7.1 \text{ Hz}$ ,  $\text{CF}_3$ ), -86.66 (q, 1F,  $^4J(\text{F}_{\text{gem}} \text{ CF}_3) = 7.2 \text{ Hz}$ ,  $\text{F}_{\text{gem}}$ ).  $^1\text{H}$  NMR (400 MHz,  $\text{CDCl}_3$ , 291 K)  $\delta$  ppm: 0.44 (t, 6H,  $^3J(\text{CH}_2 \text{ CH}_2) = 9.7 \text{ Hz}$ , Si- $\text{CH}_2$ ). 0.81 (t, 9H,  $^3J(\text{CH}_3 \text{ CH}_2) = 9.3 \text{ Hz}$ ,  $\text{CH}_3$ ), 1.24 (m, 12H,  $\text{CH}_2\text{CH}_2$ ), 1.20 (s, 9H, C-( $\text{CH}_3$ ) $_3$ ).  $^{13}\text{C}\{^1\text{H}\}$  NMR (100 MHz,  $\text{CDCl}_3$ , 298 K)  $\delta$  ppm: 12.02 (s, Si- $\text{CH}_2$ ), 13.64 (s, C-( $\text{CH}_3$ ) $_3$ ), 13.76 (s, Si- $\text{C}_3\text{H}_6$ - $\text{CH}_3$ ), 15.46 (s, C-( $\text{CH}_3$ ) $_3$ ), 25.86 (s, Si- $\text{CH}_2$ - $\text{CH}_2$ ), 26.67 (s,  $\text{CH}_2$ - $\text{CH}_3$ ), 125.00 (q.d,  $^1J(\text{C}_3 \text{ 3F}) = 270.9 \text{ Hz}$ ,  $^3J(\text{C}_3 \text{ F}_{\text{gem}}) = 24.1 \text{ Hz}$ , 3F,  $\text{C}_3$ ), 126.90 (q.d,  $^2J(\text{C}_2 \text{ 3F}) = 27.5 \text{ Hz}$ ,  $^2J(\text{C}_2 \text{ 3F}) = 18.5 \text{ Hz}$ ,  $\text{C}_2$ ), 173.17 (d.q,  $^1J(\text{C}_1 \text{ F}_{\text{gem}}) = 288.8 \text{ Hz}$ ,  $^3J(\text{C}_1 \text{ 3F}) = 6.4 \text{ Hz}$ ).  $^{29}\text{Si}\{^1\text{H}\}$  NMR (79 MHz,  $\text{CDCl}_3$ , 298 K)  $\delta$  ppm: 2.15 (d,  $^2J(\text{Si F}_{\text{gem}}) = 31.1 \text{ Hz}$ ).  $\nu_{\text{max}}/\text{cm}^{-1}$  1230 (Si-C, m), 1305, 1465 (C-F, str), 1595 (C=C, w), 2955, 2920, 2870, 2860, (C-H, m).

### 2-1-7. Reaction between $^n\text{Bu}_3\text{Si}(\text{E-CF}=\text{CFCF}_3)$ (a.2) and MeLi

$^n\text{Bu}_3\text{Si}(\text{E-CF}=\text{CFCF}_3)$  (a.2) (1.0 g, 3.0 mmol) was dissolved in dry THF (150 mL), MeLi (1.6 M, 9.4 mL, 15.0 mmol) was added slowly. The product was isolated as a brown liquid after work up using (G.P2). Yield (0.2 g, 0.6 mmol, 20 %); ratio Z:E [ $^n\text{Bu}_3\text{Si}(\text{Z-CF}=\text{CMeCF}_3)$  (18Z) 83 :  $^n\text{Bu}_3\text{Si}(\text{E-CMe}=\text{CFCF}_3)$  (18E) 17]. Anal.Calcd for  $\text{C}_{16}\text{H}_{30}\text{F}_4\text{Si}$ : C, 58.86; H, 9.27 %. Found: C, 58.38; H, 9.00 %.  $^{19}\text{F}\{^1\text{H}\}$  NMR (376 MHz,  $\text{CDCl}_3$ , 291 K)  $\delta$  ppm:  $^n\text{Bu}_3\text{Si}(\text{Z-CF}=\text{CMeCF}_3)$  -62.42 (d, 3F,  $^4J(\text{CF}_3 \text{ F}_{\text{gem}}) = 8.4 \text{ Hz}$ ,  $\text{CF}_3$ ), -98.11 (q, 1F,  $^4J(\text{F}_{\text{gem}} \text{ CF}_3) = 8.5 \text{ Hz}$ ,  $\text{F}_{\text{gem}}$ ), and  $^n\text{Bu}_3\text{Si}(\text{E-CMe}=\text{CFCF}_3)$  -67.06 (d, 3F,  $^3J(\text{CF}_3 \text{ F}_{\text{trans}}) = 10.6 \text{ Hz}$ ,  $\text{CF}_3$ ), -105.64 (q, 1F,  $^4J(\text{F}_{\text{trans}} \text{ CF}_3) = 10.5 \text{ Hz}$ ,  $\text{F}_{\text{trans}}$ ).  $^1\text{H}$  NMR (400 MHz,  $\text{CDCl}_3$ , 291 K)  $\delta$  ppm:  $^n\text{Bu}_3\text{Si}(\text{Z-CF}=\text{CMeCF}_3)$  and  $^n\text{Bu}_3\text{Si}(\text{E-CMe}=\text{CFCF}_3)$  0.40 (m, 6H, Si- $\text{CH}_2$ ), 0.43 (m, 6H, Si- $\text{CH}_2$ ), 0.81 (m, 9H,  $\text{CH}_3$ ), 0.85 (m, 9H,  $\text{CH}_3$ ), 1.24 (m, 12H,  $\text{CH}_2\text{CH}_2$ ), 1.26 (m, 12H,  $\text{CH}_2\text{CH}_2$ ), 3.33 (s, 3H,  $\text{CH}_3$ ), 3.36 (s, 3H,  $\text{CH}_3$ ).  $^{13}\text{C}\{^1\text{H}\}$  NMR (100 MHz,  $\text{CDCl}_3$ , 298 K)  $\delta$  ppm:  $^n\text{Bu}_3\text{Si}(\text{Z-CF}=\text{CMeCF}_3)$  and  $^n\text{Bu}_3\text{Si}(\text{E-CMe}=\text{CFCF}_3)$ : 11.30 (s, C=C- $\text{CH}_3$ ), 12.07 (s, C=C- $\text{CH}_3$ ), 13.53 (s, Si- $\text{CH}_2$ ), 13.75 (s, Si- $\text{CH}_2$ ), 14.75 (s,  $\text{CH}_3$ - $\text{CH}_2$ ), 15.41 (s,  $\text{CH}_3$ - $\text{CH}_2$ ), 25.52 (s, Si- $\text{CH}_2$ - $\text{CH}_2$ -), 26.18 (s, Si- $\text{CH}_2$ - $\text{CH}_2$ -), 26.68 (s,

CH<sub>3</sub>-CH<sub>2</sub>-CH<sub>2</sub>), 26.79 (s, CH<sub>3</sub>-CH<sub>2</sub>-CH<sub>2</sub>), 26.79 (s, CH<sub>3</sub>-CH<sub>2</sub>-CH<sub>2</sub>), <sup>n</sup>Bu<sub>3</sub>Si(Z-CF=CMeCF<sub>3</sub>) 122.80 (m, C<sub>2</sub>), 125.00 (q.d, <sup>1</sup>J(C<sub>3</sub> 3F) = 270.6 Hz, <sup>3</sup>J(C<sub>3</sub> F<sub>gem</sub>) = 23.9 Hz, C<sub>3</sub>), 172.00 (d.q, <sup>1</sup>J(C<sub>1</sub> F<sub>gem</sub>) = 287.9 Hz, <sup>3</sup>J(C<sub>1</sub> 3F) = 6.6 Hz, C<sub>1</sub>). <sup>n</sup>Bu<sub>3</sub>Si(E-CMe=CFCF<sub>3</sub>): 115.00 (m, C<sub>3</sub>), 116.60 (d.q, <sup>3</sup>J(C<sub>1</sub> 3F) = 3.5 Hz, <sup>2</sup>J(C<sub>1</sub> F<sub>trans</sub>) = 8.4 Hz, C<sub>1</sub>), 147.00 (d.q, <sup>1</sup>J(C<sub>2</sub> F<sub>trans</sub>) = 266.7 Hz, <sup>2</sup>J(C<sub>2</sub> 3F) = 39.8 Hz, C<sub>2</sub>). <sup>29</sup>Si{<sup>1</sup>H} NMR (79 MHz, CDCl<sub>3</sub>, 298 K) δ ppm: <sup>n</sup>Bu<sub>3</sub>Si(Z-CF=CMeCF<sub>3</sub>) 2.00 (d, <sup>2</sup>J(Si F<sub>gem</sub>) = 31.0 Hz); <sup>n</sup>Bu<sub>3</sub>Si(E-CMe=CFCF<sub>3</sub>) 0.90 (d, <sup>3</sup>J(Si F<sub>trans</sub>) = 8.7 Hz). ν<sub>max</sub>/cm<sup>-1</sup> 1260 (Si-C, m), 1375, 1465 (C-F, str), 1590 (C=C, w), 2955, 290, 2870, (C-H, m).

### 2-1-8. Reaction between <sup>n</sup>Bu<sub>3</sub>Si(E-CF=CFCF<sub>3</sub>) (a.2) and PhLi

<sup>n</sup>Bu<sub>3</sub>Si(E-CF=CFCF<sub>3</sub>) (a.2) (1.0 g, 3.0 mmol) was dissolved in dry THF (150 mL), PhLi (2.0 M, 7.5 mL, 15.0 mmol) was added slowly. The product was isolated as a brown liquid after work up using (G.P2). Yield (0.4 g, 1.0 mmol, 33 %); ratio Z:E [<sup>n</sup>Bu<sub>3</sub>Si(Z-CF=CPhCF<sub>3</sub>) (19Z) 69 : <sup>n</sup>Bu<sub>3</sub>Si(E-CPh=CFCF<sub>3</sub>) (19E) 31]. Anal.Calcd for C<sub>21</sub>H<sub>32</sub>F<sub>4</sub>Si: C, 64.91; H, 8.31 %. Found: C, 64.86; H, 8.26 %. <sup>19</sup>F{<sup>1</sup>H} NMR (376 MHz, CDCl<sub>3</sub>, 291 K) δ ppm: <sup>n</sup>Bu<sub>3</sub>Si(Z-CF=CPhCF<sub>3</sub>) -58.51 (d, 3F, <sup>4</sup>J(CF<sub>3</sub> F<sub>gem</sub>) = 9.1 Hz, CF<sub>3</sub>), -93.02 (q, 1F, <sup>4</sup>J(F<sub>gem</sub> CF<sub>3</sub>) = 9.0 Hz, F<sub>gem</sub>), and <sup>n</sup>Bu<sub>3</sub>Si(E-CPh=CFCF<sub>3</sub>) -67.67 (d, 3F, <sup>3</sup>J(CF<sub>3</sub> F<sub>trans</sub>) = 10.8 Hz, CF<sub>3</sub>), -100.34 (q, 1F, <sup>3</sup>J(F<sub>trans</sub> CF<sub>3</sub>) = 10.8 Hz, F<sub>trans</sub>). <sup>1</sup>H NMR (400 MHz, CDCl<sub>3</sub>, 291 K) δ ppm: <sup>n</sup>Bu<sub>3</sub>Si(Z-CF=CPhCF<sub>3</sub>) and <sup>n</sup>Bu<sub>3</sub>Si(E-CPh=CFCF<sub>3</sub>) 0.70 (t, 6H, <sup>3</sup>J(CH<sub>2</sub> CH<sub>2</sub>) = 6.3 Hz, Si-CH<sub>2</sub>), 0.79 (t, 6H, <sup>3</sup>J(CH<sub>2</sub> CH<sub>2</sub>) = 6.5 Hz, Si-CH<sub>2</sub>), 0.88 (m, 9H, -CH<sub>3</sub>), 0.91 (m, 9H, -CH<sub>3</sub>), 1.24 (m, 12H, -CH<sub>2</sub>CH<sub>2</sub>-), 1.63 (m, 12H, -CH<sub>2</sub>CH<sub>2</sub>-), 7.25-7.45 (m, 10H, Ph). <sup>13</sup>C{<sup>1</sup>H} NMR (100 MHz, CDCl<sub>3</sub>, 298 K) δ ppm: <sup>n</sup>Bu<sub>3</sub>Si(Z-CF=CPhCF<sub>3</sub>) and <sup>n</sup>Bu<sub>3</sub>Si(E-CPh=CFCF<sub>3</sub>) 11.44 (s, Si-CH<sub>2</sub>), 12.21 (s, Si-CH<sub>2</sub>), 13.62 (s, CH<sub>3</sub>), 13.79 (s, CH<sub>3</sub>), 25.83 (s, Si-CH<sub>2</sub>-CH<sub>2</sub>-CH<sub>2</sub>), 26.09 (s, Si-CH<sub>2</sub>-CH<sub>2</sub>-CH<sub>2</sub>-), 26.51 (s, CH<sub>3</sub>-CH<sub>2</sub>-), 26.83 (s, CH<sub>3</sub>-CH<sub>2</sub>-), 126.66 (s, Ph), 127.17 (s, Ph), 127.63 (s, Ph), 128.30 (s, Ph), 128.62 (s, Ph), 129.58 (s, Ph), 134.12 (s, Ph), 138.23 (s, Ph), <sup>n</sup>Bu<sub>3</sub>Si(Z-CF=CPhCF<sub>3</sub>) 124.00 (q.d, <sup>1</sup>J(C<sub>3</sub> 3F) = 271.8 Hz, <sup>3</sup>J(C<sub>3</sub> F<sub>gem</sub>) = 21.4 Hz, C<sub>3</sub>), 124.6 (m, C<sub>2</sub>), 173.00 (d.q, <sup>1</sup>J(C<sub>1</sub> F<sub>gem</sub>) = 294.9 Hz, <sup>3</sup>J(C<sub>1</sub> 3F) = 6.0 Hz, C<sub>1</sub>). <sup>n</sup>Bu<sub>3</sub>Si(E-CPh=CFCF<sub>3</sub>): 117.20 (m, C<sub>3</sub>), 136.20 (d, <sup>2</sup>J(C<sub>2</sub> F<sub>trans</sub>) = 9.7 Hz, C<sub>2</sub>), 147.50 (d.q, <sup>1</sup>J(C<sub>1</sub> F<sub>trans</sub>) = 270.0 Hz, <sup>3</sup>J(C<sub>1</sub> 3F) = 40.2 Hz, C<sub>1</sub>). <sup>29</sup>Si{<sup>1</sup>H} NMR (79 MHz, CDCl<sub>3</sub>, 298 K) δ ppm: <sup>n</sup>Bu<sub>3</sub>Si(Z-CF=CPhCF<sub>3</sub>) 3.71 (d, <sup>2</sup>J(Si F<sub>gem</sub>) = 30.6 Hz); <sup>n</sup>Bu<sub>3</sub>Si(E-CPh=CFCF<sub>3</sub>) -0.01 (d, <sup>3</sup>J(Si F<sub>trans</sub>) = 5.4 Hz). ν<sub>max</sub>/cm<sup>-1</sup> 1290 (Si-C, m), 1345, 1475 (C-F, str), 3060, 3030 (C-H in Ph, m), 2925 (C-H, m), 1690 (C=C, w).

### 2-1-9. Reaction between <sup>n</sup>Bu(Me)<sub>2</sub>Si(E-CF=CFCF<sub>3</sub>) (a.4) and <sup>n</sup>BuLi

<sup>n</sup>Bu(Me)<sub>2</sub>Si(E-CF=CFCF<sub>3</sub>) (3.4) (1.0 g, 4.0 mmol) was dissolved in dry THF (150 mL), <sup>n</sup>BuLi (2.5 M, 3.2 mL, 8.0 mmol) was added slowly. The product was isolated as a brown liquid after work up using (G.P2). Yield (0.6 g, 2.0 mmol, 50 %); ratio Z:E [<sup>n</sup>Bu(Me)<sub>2</sub>Si(Z-CF=C<sup>n</sup>BuCF<sub>3</sub>) (20Z) 57 : <sup>n</sup>Bu(Me)<sub>2</sub>Si(E-C<sup>n</sup>Bu=CFCF<sub>3</sub>) (20E) 43]. Anal.Calcd for C<sub>13</sub>H<sub>24</sub>F<sub>4</sub>Si: C, 54.90; H, 8.51 %. Found: C, 54.54; H, 8.47 %. <sup>19</sup>F{<sup>1</sup>H} NMR (376 MHz, CDCl<sub>3</sub>, 291 K) δ ppm: <sup>n</sup>Bu(Me)<sub>2</sub>Si(Z-CF=C<sup>n</sup>BuCF<sub>3</sub>) -59.74 (d, 3F, <sup>4</sup>J(CF<sub>3</sub> F<sub>gem</sub>) = 8.5 Hz, CF<sub>3</sub>), -100.36 (q, 1F, <sup>4</sup>J(F<sub>gem</sub> CF<sub>3</sub>) = 8.6 Hz, F<sub>gem</sub>) and <sup>n</sup>Bu(Me)<sub>2</sub>Si(E-C<sup>n</sup>Bu=CFCF<sub>3</sub>) -66.88 (d, 3F, <sup>3</sup>J(CF<sub>3</sub> F<sub>gem</sub>) = 10.5 Hz, CF<sub>3</sub>), -108.49 (q, 1F, <sup>3</sup>J(F<sub>gem</sub> CF<sub>3</sub>) = 10.4 Hz, F<sub>gem</sub>). <sup>1</sup>H NMR (400 MHz, CDCl<sub>3</sub>, 291 K) δ ppm: <sup>n</sup>Bu(Me)<sub>2</sub>Si(Z-CF=C<sup>n</sup>BuCF<sub>3</sub>) and <sup>n</sup>Bu(Me)<sub>2</sub>Si(E-C<sup>n</sup>Bu=CFCF<sub>3</sub>): -0.15 (s, 6H, Si-CH<sub>3</sub>), -0.11 (s, 6H, Si-CH<sub>3</sub>), 0.01 (t, 2H, <sup>3</sup>J(CH<sub>2</sub> CH<sub>2</sub>) = 6.6 Hz, Si-CH<sub>2</sub>), 0.03 (t, 2H, <sup>3</sup>J(CH<sub>2</sub> CH<sub>2</sub>) = 6.3 Hz, Si-CH<sub>2</sub>), 0.32 (t, 3H, <sup>3</sup>J(CH<sub>3</sub> CH<sub>2</sub>) = 7.0 Hz, SiC<sub>3</sub>H<sub>6</sub>-CH<sub>3</sub>), 0.52 (t, 3H, <sup>3</sup>J(CH<sub>3</sub> CH<sub>2</sub>) = 6.9 Hz, SiC<sub>3</sub>H<sub>6</sub>-CH<sub>3</sub>), 0.73 (m, 3H, =CC<sub>3</sub>H<sub>6</sub>-CH<sub>3</sub>), 0.81 (m, 3H, =CC<sub>3</sub>H<sub>6</sub>-CH<sub>3</sub>), 1.14 (m, 4H, CH<sub>2</sub>CH<sub>2</sub>), 1.18 (m, 4H, CH<sub>2</sub>CH<sub>2</sub>), 1.27 (m, 4H, CH<sub>2</sub>CH<sub>2</sub>), 1.27 (m, 4H, CH<sub>2</sub>CH<sub>2</sub>), 2.14 (t, 2H, <sup>3</sup>J(CH<sub>2</sub> CH<sub>2</sub>) = 7.3 Hz, CH<sub>2</sub>-C=), 2.86 (t, 2H, <sup>3</sup>J(CH<sub>2</sub> CH<sub>2</sub>) = 7.9 Hz, CH<sub>2</sub>-C=). <sup>13</sup>C{<sup>1</sup>H} NMR (100 MHz, CDCl<sub>3</sub>, 298 K) δ ppm: <sup>n</sup>Bu(Me)<sub>2</sub>Si(Z-CF=C<sup>n</sup>BuCF<sub>3</sub>) and <sup>n</sup>Bu(Me)<sub>2</sub>Si(E-C<sup>n</sup>Bu=CFCF<sub>3</sub>): -3.67 (s, Si-CH<sub>3</sub>), -2.32 (s, Si-CH<sub>3</sub>), 0.12 (s, Si-CH<sub>2</sub>), 0.72 (s, Si-CH<sub>2</sub>), 13.34 (s, =C-CH<sub>2</sub>), 13.37 (s, =C-CH<sub>2</sub>), 22.30 (s, CH<sub>2</sub>-CH<sub>3</sub>), 22.40 (s, CH<sub>2</sub>-CH<sub>3</sub>), 25.77 (s, CH<sub>2</sub>-CH<sub>3</sub>), 26.19 (s, CH<sub>2</sub>-CH<sub>3</sub>), 25.34 (s, CH<sub>2</sub>-CH<sub>2</sub>-CH<sub>2</sub>), 25.48 (s, CH<sub>2</sub>-CH<sub>2</sub>-CH<sub>2</sub>-), 26.04 (s, CH<sub>2</sub>-CH<sub>2</sub>-CH<sub>2</sub>-), 26.16 (s, CH<sub>2</sub>-CH<sub>2</sub>-CH<sub>2</sub>-), 27.61 (CH<sub>2</sub>-CH<sub>2</sub>-CH<sub>3</sub>), 27.48 (CH<sub>2</sub>-CH<sub>2</sub>-CH<sub>3</sub>), 30.56 (CH<sub>2</sub>-CH<sub>2</sub>-CH<sub>3</sub>), 31.33 (CH<sub>2</sub>-CH<sub>2</sub>-CH<sub>3</sub>), <sup>n</sup>Bu(Me)<sub>2</sub>Si(Z-CF=C<sup>n</sup>BuCF<sub>3</sub>) 125.20 (q.d, <sup>1</sup>J(C<sub>3</sub> 3F) = 272.7 Hz, <sup>3</sup>J(C<sub>3</sub> F<sub>gem</sub>) = 23.1 Hz, C<sub>3</sub>), 126.90 (q.d, <sup>2</sup>J(C<sub>2</sub> 3F) = 28.7 Hz, <sup>2</sup>J(C<sub>2</sub> F<sub>gem</sub>) = 18.3 Hz, C<sub>2</sub>), 173.40 (d.q, <sup>1</sup>J(C<sub>1</sub> F<sub>gem</sub>) = 288.0 Hz, <sup>3</sup>J(C<sub>1</sub> 3F) = 6.0 Hz); <sup>n</sup>Bu(Me)<sub>2</sub>Si(E-C<sup>n</sup>Bu=CFCF<sub>3</sub>) 118.73 (q.d, <sup>1</sup>J(C<sub>3</sub> 3F) = 271.8 Hz, <sup>1</sup>J(C<sub>3</sub> F<sub>trans</sub>) = 48.2 Hz, C<sub>3</sub>), 122.25 (d, <sup>2</sup>J(C<sub>1</sub> F<sub>trans</sub>) = 8.7 Hz, C<sub>1</sub>), 147.27 (d.q, <sup>1</sup>J(C<sub>2</sub> F<sub>trans</sub>) = 287.9 Hz, <sup>2</sup>J(C<sub>2</sub> 3F) = 40.9 Hz, C<sub>2</sub>). <sup>29</sup>Si{<sup>1</sup>H} NMR (79 MHz, CDCl<sub>3</sub>, 298 K) δ ppm: <sup>n</sup>Bu(Me)<sub>2</sub>Si(Z-CF=C<sup>n</sup>BuCF<sub>3</sub>) 3.71 (d, <sup>2</sup>J(Si F<sub>gem</sub>) = 30.6 Hz); <sup>n</sup>Bu(Me)<sub>2</sub>Si(E-C<sup>n</sup>Bu=CFCF<sub>3</sub>) -0.01 (d, <sup>3</sup>J(Si F<sub>trans</sub>) = 5.4 Hz). ν<sub>max</sub>/cm<sup>-1</sup> 1295 (Si-C, m), 1315, 1465 (C-F, str), 1635 (C=C, w), 2955, 2920, 2870, 2860 (C-H, m).



### 2-1-10. Reaction between ${}^n\text{Bu}(\text{Me})_2\text{Si}(\text{E}-\text{CF}=\text{CFCF}_3)$ (a.4) and ${}^t\text{BuLi}$

${}^n\text{Bu}(\text{Me})_2\text{Si}(\text{E}-\text{CF}=\text{CFCF}_3)$  (a.4) (1.0 g, 4.0 mmol) was dissolved in dry THF (150 mL),  ${}^t\text{BuLi}$  (1.7 M, 4.7 mL, 8.0 mmol) was added slowly. After work up using (G.P2), the product was isolated as a brown liquid. Yield (0.5 g, 1.8 mmol, 45 %). Anal.Calcd for  $\text{C}_{13}\text{H}_{24}\text{F}_4\text{Si}$ : C, 54.90; H, 8.51 %. Found: C, 54.95; H, 8.94 %.  ${}^{19}\text{F}\{^1\text{H}\}$  NMR (376 MHz,  $\text{CDCl}_3$ , 291 K)  $\delta$  ppm: -55.20 (d, 3F,  ${}^4J(\text{CF}_3 \text{ F}) = 7.3$  Hz,  $\text{CF}_3$ ), -88.24 (q, 1F,  ${}^4J(\text{F CF}_3) = 7.1$  Hz,  $\text{F}_{\text{gem}}$ ).  ${}^1\text{H}$  NMR (400 MHz,  $\text{CDCl}_3$ , 291 K)  $\delta$  ppm: -0.04 (s, 6H, Si-CH<sub>3</sub>), 0.13 (t, 2H,  ${}^3J(\text{CH}_2 \text{ CH}_2) = 1.4$  Hz, Si-CH<sub>2</sub>), 0.82 (m, 4H, CH<sub>2</sub>CH<sub>2</sub>), 1.20 (s, 9H, C-CH<sub>3</sub>).  ${}^{13}\text{C}\{^1\text{H}\}$  NMR (100 MHz,  $\text{CDCl}_3$ , 298 K)  $\delta$  ppm: -3.75 (s, Si-CH<sub>3</sub>), 12.66 (s, Si-CH<sub>2</sub>), 13.85 (s, =C-C-CH<sub>3</sub>), 24.84 (s, Si-C<sub>3</sub>H<sub>6</sub>-CH<sub>3</sub>), 25.25 (s, C-CH<sub>3</sub>), 28.95 (s, Si-CH<sub>2</sub>-CH<sub>2</sub>), 33.87 (s, Si-C<sub>2</sub>H<sub>4</sub>-CH<sub>2</sub>-CH<sub>3</sub>), 124.55 (q.d,  ${}^1J(\text{C}_3 \text{ 3F}) = 273.5$  Hz,  ${}^3J(\text{C}_3 \text{ F}_{\text{gem}}) = 28.4$  Hz, 3F, C<sub>3</sub>), 132.01 (q.d,  ${}^2J(\text{C}_2 \text{ 3F}) = 24.8$  Hz,  ${}^2J(\text{C}_2 \text{ 3F}) = 13.0$  Hz, C<sub>2</sub>), 174.98 (d.q,  ${}^1J(\text{C}_1 \text{ F}_{\text{gem}}) = 292.7$  Hz,  ${}^3J(\text{C}_1 \text{ 3F}) = 9.2$  Hz).  ${}^{29}\text{Si}\{^1\text{H}\}$  NMR (79 MHz,  $\text{CDCl}_3$ , 298 K)  $\delta$  ppm: -1.85 (d,  ${}^2J(\text{Si F}_{\text{gem}}) = 37.2$  Hz).  $\nu_{\text{max}}/\text{cm}^{-1}$  1260 (Si-C, m), 1375, 1460 (C-F, str), 1600 (C=C, w) 2955, 2920, 2870, 2580 (C-H, m).

### 2-1-11. Reaction between ${}^n\text{Bu}(\text{Me})_2\text{Si}(\text{E}-\text{CF}=\text{CFCF}_3)$ (a.4) and MeLi

${}^n\text{Bu}(\text{Me})_2\text{Si}(\text{E}-\text{CF}=\text{CFCF}_3)$  (a.4) (1.0 g, 4.0 mmol) was dissolved in dry THF (150 mL), MeLi (1.6 M, 12.5 mL, 20.0 mmol). After work up using (G.P2), the product was isolated as a brown liquid. Yield (0.4 g, 1.6 mmol, 40 %); ratio Z:E [ ${}^n\text{Bu}(\text{Me})_2\text{Si}(\text{Z}-\text{CF}=\text{CMeCF}_3)$  (22Z) 40 :  ${}^n\text{Bu}(\text{Me})_2\text{Si}(\text{E}-\text{CMe}=\text{CFCF}_3)$  (22E) 60]. Anal.Calcd for  $\text{C}_{10}\text{H}_{18}\text{F}_4\text{Si}$ : C, 49.56; H, 7.49 %. Found: C, 49.30; H, 7.44 %.  ${}^{19}\text{F}\{^1\text{H}\}$  NMR (376 MHz,  $\text{CDCl}_3$ , 291 K)  $\delta$  ppm:  ${}^n\text{Bu}(\text{Me})_2\text{Si}(\text{Z}-\text{CF}=\text{CMeCF}_3)$  -61.59 (d, 3F,  ${}^4J(\text{CF}_3 \text{ F}_{\text{gem}}) = 8.3$  Hz,  $\text{CF}_3$ ), -99.39 (q, 1F,  ${}^4J(\text{F CF}_3) = 8.5$  Hz,  $\text{F}_{\text{gem}}$ ) and  ${}^n\text{Bu}(\text{Me})_2\text{Si}(\text{E}-\text{CMe}=\text{CFCF}_3)$  -66.65 (d, 3F,  ${}^3J(\text{CF}_3 \text{ F}_{\text{trans}}) = 10.2$  Hz,  $\text{CF}_3$ ), -107.12 (q, 1F,  ${}^3J(\text{F CF}_3) = 10.5$  Hz,  $\text{F}_{\text{trans}}$ ).  ${}^1\text{H}$  NMR (400 MHz,  $\text{CDCl}_3$ , 291 K)  $\delta$  ppm:  ${}^n\text{Bu}(\text{Me})_2\text{Si}(\text{Z}-\text{CF}=\text{CMeCF}_3)$  and  ${}^n\text{Bu}(\text{Me})_2\text{Si}(\text{E}-\text{CMe}=\text{CFCF}_3)$  0.10 (s, 6H, Si-CH<sub>3</sub>), 0.14 (s, 6H, Si-CH<sub>3</sub>), 0.43 (m, 2H, Si-CH<sub>2</sub>), 0.63 (m, 2H, Si-CH<sub>2</sub>), 0.81 (t, 3H,  ${}^3J(\text{CH}_3 \text{ CH}_2) = 7.2$  Hz, CH<sub>3</sub>), 0.82 (t, 3H,  ${}^3J(\text{CH}_3 \text{ CH}_2) = 7.1$  Hz, CH<sub>3</sub>), 1.19 (m, 4H, CH<sub>2</sub>CH<sub>2</sub>), 1.23 (m, 4H, CH<sub>2</sub>CH<sub>2</sub>), 1.76 (s, 3H, =C-CH<sub>3</sub>), 1.75 (s, 3H, =C-CH<sub>3</sub>).  ${}^{13}\text{C}\{^1\text{H}\}$  NMR (100 MHz,  $\text{CDCl}_3$ , 298 K)  $\delta$  ppm:  ${}^n\text{Bu}(\text{Me})_2\text{Si}(\text{Z}-\text{CF}=\text{CMeCF}_3)$  and  ${}^n\text{Bu}(\text{Me})_2\text{Si}(\text{E}-\text{CMe}=\text{CFCF}_3)$  -4.37 (s, Si-CH<sub>3</sub>), -3.32 (s, Si-CH<sub>3</sub>), 0.37 (s, =C-CH<sub>3</sub>), 0.74 (s, =C-CH<sub>3</sub>), 12.06 (s, Si-CH<sub>2</sub>), 12.66 (s, Si-CH<sub>2</sub>), 13.27 (s, Si-C<sub>3</sub>H<sub>6</sub>-CH<sub>3</sub>), 14.12 (s, Si-C<sub>3</sub>H<sub>6</sub>-CH<sub>3</sub>), 24.52 (s, Si-CH<sub>2</sub>-CH<sub>2</sub>), 24.65 (s, Si-CH<sub>2</sub>-CH<sub>2</sub>), 25.27 (s, Si-C<sub>2</sub>H<sub>4</sub>-CH<sub>2</sub>-CH<sub>3</sub>), 25.38 (s, Si-C<sub>2</sub>H<sub>4</sub>-CH<sub>2</sub>-CH<sub>3</sub>);  ${}^n\text{Bu}(\text{Me})_2\text{Si}(\text{Z}-\text{CF}=\text{CMeCF}_3)$  123.59 (q.d,  ${}^1J(\text{C}_3 \text{ 3F}) = 271.8$  Hz,  ${}^3J(\text{C}_3 \text{ F}_{\text{gem}}) = 24.7$  Hz, C<sub>3</sub>), 121.45 (m, C<sub>2</sub>), 171.93 (d.q,  ${}^1J(\text{C}_1 \text{ F}_{\text{gem}}) = 286.6$  Hz,  ${}^3J(\text{C}_1 \text{ 3F}) = 6.6$  Hz, C<sub>1</sub>),  ${}^n\text{Bu}(\text{Me})_2\text{Si}(\text{E}-\text{CMe}=\text{CFCF}_3)$  117.93 (q.d,  ${}^1J(\text{C}_3 \text{ 3F}) = 274.5$  Hz,  ${}^2J(\text{C}_3 \text{ F}_{\text{trans}}) = 50.1$  Hz, C<sub>3</sub>), 116.89 (m, C<sub>1</sub>), 146.03 (d.q,  ${}^1J(\text{C}_2 \text{ F}_{\text{trans}}) = 227.3$  Hz,  ${}^2J(\text{C}_2 \text{ 3F}) = 40.0$  Hz, C<sub>2</sub>).  ${}^{29}\text{Si}\{^1\text{H}\}$  NMR (79 MHz,  $\text{CDCl}_3$ , 298 K)  $\delta$  ppm:  ${}^n\text{Bu}(\text{Me})_2\text{Si}(\text{Z}-\text{CF}=\text{CMeCF}_3)$  -21.95 (d,  ${}^2J(\text{Si F}_{\text{gem}}) = 37.0$  Hz);  ${}^n\text{Bu}(\text{Me})_2\text{Si}(\text{E}-\text{CMe}=\text{CFCF}_3)$  7.25 (d,  ${}^3J(\text{Si F}_{\text{trans}}) = 5.6$  Hz).  $\nu_{\text{max}}/\text{cm}^{-1}$  1250 (Si-C, w), 1300, 1445 (C-F, str), 1600 (C=C, w), 2940, 2830 (C-H, m).

### 2-1-12. Reaction between $\text{Me}_2\text{PhSi}(\text{E}-\text{CF}=\text{CFCF}_3)$ (a.5) and ${}^n\text{BuLi}$

$\text{Me}_2\text{PhSi}(\text{E}-\text{CF}=\text{CFCF}_3)$  (a.5) (1.0 g, 4.0 mmol) was dissolved in dry THF (150 mL),  ${}^n\text{BuLi}$  (2.5 M, 3.2 mL, 8.0 mmol) was added slowly. After work up using (G.P2), the product was isolated as a brown liquid. Yield (0.6 g, 2.9 mmol, 66 %); ratio Z:E [ $\text{Me}_2\text{PhSi}(\text{Z}-\text{CF}=\text{C}^n\text{BuCF}_3)$  (23Z) 55 :  $\text{Me}_2\text{PhSi}(\text{E}-\text{C}^n\text{Bu}=\text{CFCF}_3)$  (23E) 45]. Anal.Calcd for  $\text{C}_{15}\text{H}_{20}\text{F}_4\text{Si}$ : C, 59.19; H, 6.63 %. Found: C, 59.17; H, 6.87 %.  ${}^{19}\text{F}\{^1\text{H}\}$  NMR (376 MHz,  $\text{CDCl}_3$ , 291 K)  $\delta$  ppm:  $\text{Me}_2\text{PhSi}(\text{Z}-\text{CF}=\text{C}^n\text{BuCF}_3)$  -59.38 (d, 3F,  ${}^4J(\text{CF}_3 \text{ F}_{\text{gem}}) = 8.2$  Hz,  $\text{CF}_3$ ), -99.54 (q, 1F,  ${}^4J(\text{F}_{\text{gem}} \text{ CF}_3) = 8.6$  Hz,  $\text{F}_{\text{gem}}$ ) and  $\text{Me}_2\text{PhSi}(\text{E}-\text{C}^n\text{Bu}=\text{CFCF}_3)$  -66.48 (d, 3F,  ${}^3J(\text{CF}_3 \text{ F}_{\text{trans}}) = 10.0$  Hz,  $\text{CF}_3$ ), -107.00 (q, 1F,  ${}^3J(\text{F}_{\text{trans}} \text{ CF}_3) = 10.2$  Hz,  $\text{F}_{\text{trans}}$ ).  ${}^1\text{H}$  NMR (400 MHz,  $\text{CDCl}_3$ , 291 K)  $\delta$  ppm: 0.17 (s, 3H, Si-CH<sub>3</sub>), 0.25 (s, 3H, Si-CH<sub>3</sub>), 0.39 (t, 3H,  ${}^3J(\text{CH}_3 \text{ CH}_2) = 0.8$  Hz, CH<sub>3</sub>), 0.43 (t, 3H,  ${}^3J(\text{CH}_3 \text{ CH}_2) = 0.9$  Hz, CH<sub>3</sub>), 0.74 (m, 4H, CH<sub>2</sub>CH<sub>2</sub>), 0.83 (m, 4H, CH<sub>2</sub>CH<sub>2</sub>), 2.13 (t, 2H,  ${}^3J(\text{CH}_2 \text{ CH}_3) = 8.3$  Hz, =C-CH<sub>2</sub>), 2.39 (t, 2H,  ${}^3J(\text{CH}_2 \text{ CH}_3) = 8.5$  Hz, =C-CH<sub>2</sub>), 7.41 (m, 5H, Ph), 7.45 (m, 5H, Ph).  ${}^{13}\text{C}\{^1\text{H}\}$  NMR (100 MHz,  $\text{CDCl}_3$ , 298 K)  $\delta$  ppm:  $\text{Me}_2\text{PhSi}(\text{Z}-\text{CF}=\text{C}^n\text{BuCF}_3)$  and  $\text{Me}_2\text{PhSi}(\text{E}-\text{C}^n\text{Bu}=\text{CFCF}_3)$  -3.02 (s, Si-CH<sub>3</sub>), -4.38 (s, Si-CH<sub>3</sub>), 12.65 (s, =C-CH<sub>2</sub>), 12.78 (s, =C-CH<sub>2</sub>), 21.52 (s, =C-C<sub>3</sub>H<sub>6</sub>-CH<sub>3</sub>), 21.63 (s, =C-C<sub>3</sub>H<sub>6</sub>-CH<sub>3</sub>), 24.54 (s, =C-C<sub>2</sub>H<sub>2</sub>-CH<sub>2</sub>-), 24.69 (s, =C-C<sub>2</sub>H<sub>2</sub>-CH<sub>2</sub>-), 25.26 (s, =C-CH<sub>2</sub>-CH<sub>2</sub>-), 25.41 (s, =C-CH<sub>2</sub>-CH<sub>2</sub>-), 126.70 (s, Ph), 126.83 (s, Ph), 128.17 (s, Ph), 128.29 (s, Ph), 132.11 (s, Ph), 132.35 (s, Ph), 138.45 (s, Ph), 138.80 (s, Ph);  $\text{Me}_2\text{PhSi}(\text{Z}-\text{CF}=\text{C}^n\text{BuCF}_3)$ : 124.34 (q.d,  ${}^1J(\text{C}_3 \text{ 3F}) = 270.3$  Hz,  ${}^3J(\text{C}_3 \text{ F}_{\text{gem}}) = 24.9$  Hz, C<sub>3</sub>), 126.22 (m, C<sub>2</sub>), 172.71 (d.q,  ${}^1J(\text{C}_1 \text{ F}_{\text{gem}}) = 288.5$  Hz,  ${}^3J(\text{C}_1 \text{ 3F}) = 7.5$  Hz, C<sub>1</sub>),  $\text{Me}_2\text{PhSi}(\text{E}-\text{C}^n\text{Bu}=\text{CFCF}_3)$ , 117.91 (q.d,  ${}^1J(\text{C}_3 \text{ 3F}) = 270.8$  Hz,  ${}^2J(\text{C}_3 \text{ F}_{\text{trans}}) = 49.6$  Hz, C<sub>3</sub>), 121.61 (m, C<sub>1</sub>), 146.46 (d.q,  ${}^1J(\text{C}_2 \text{ F}_{\text{trans}}) = 267.8$  Hz,  ${}^2J(\text{C}_2 \text{ 3F}) = 39.4$  Hz, C<sub>2</sub>).  ${}^{29}\text{Si}\{^1\text{H}\}$  NMR (79 MHz,  $\text{CDCl}_3$ ,

298 K)  $\delta$  ppm: Me<sub>2</sub>PhSi(Z-CF=C<sup>n</sup>BuCF<sub>3</sub>) -7.70 (d, <sup>2</sup>J(Si F<sub>gem</sub>) = 37.8 Hz); Me<sub>2</sub>PhSi(E-C<sup>n</sup>Bu=CFCF<sub>3</sub>) -6.22 (d, <sup>3</sup>J(Si F<sub>trans</sub>) = 11.5 Hz).  $\nu_{\max}$ /cm<sup>-1</sup> 1250 (Si-C, w), 1320, 1460 (C-F, str), 1640 (C=C, w), 2960, 2870 (C-H, m), 3010 (C-H in Ph, w).

### 2-1-13. Reaction between Me<sub>2</sub>PhSi(CF=CFCF<sub>3</sub>) (a.5) and <sup>t</sup>BuLi

Me<sub>2</sub>PhSi(E-CF=CFCF<sub>3</sub>) (a.5) (1.0 g, 4.0 mmol) was dissolved in dry THF (150 mL), <sup>t</sup>BuLi (1.7 M, 4.7 mL, 8.0 mmol) was added slowly. After work up using (G.P2), the product was isolated as a brown liquid. Yield (0.3 g, 0.9 mmol, 33 %); ratio Z:E [Me<sub>2</sub>PhSi(Z-CF=C<sup>t</sup>BuCF<sub>3</sub>) (24Z) 72 : Me<sub>2</sub>PhSi(E-C<sup>t</sup>Bu=CFCF<sub>3</sub>) (24E) 28]. Anal.Calcd for C<sub>15</sub>H<sub>20</sub>F<sub>4</sub>Si: C, 59.19; H, 6.63 %. Found: C, 59.00; H, 6.55 %. <sup>19</sup>F{<sup>1</sup>H} NMR (376 MHz, CDCl<sub>3</sub>, 291 K)  $\delta$  ppm: Me<sub>2</sub>PhSi(Z-CF=C<sup>t</sup>BuCF<sub>3</sub>) -59.17 (d, 3F, <sup>4</sup>J(CF<sub>3</sub> F<sub>gem</sub>) = 8.2 Hz, CF<sub>3</sub>), -99.55 (q, 1F, <sup>4</sup>J(F CF<sub>3</sub>) = 9.0 Hz, F<sub>gem</sub>) and Me<sub>2</sub>PhSi(E-C<sup>t</sup>Bu=CFCF<sub>3</sub>) -66.27 (d, 3F, <sup>3</sup>J(CF<sub>3</sub> F<sub>trans</sub>) = 10.3 Hz, CF<sub>3</sub>), -106.72 (q, 1F, <sup>3</sup>J(F CF<sub>3</sub>) = 10.9 Hz, F<sub>trans</sub>). <sup>1</sup>H NMR (400 MHz, CDCl<sub>3</sub>, 291 K)  $\delta$  ppm: Me<sub>2</sub>PhSi(Z-CF=C<sup>t</sup>BuCF<sub>3</sub>) and Me<sub>2</sub>PhSi(E-C<sup>t</sup>Bu=CFCF<sub>3</sub>) 0.26 (s, 6H, Si-CH<sub>3</sub>), 0.27 (s, 6H, Si-CH<sub>3</sub>), 1.19 (s, 9H, C-CH<sub>3</sub>), 1.20 (s, 9H, C-CH<sub>3</sub>), 7.48 (s, 5H, Ph), 7.49 (s, 5H, Ph). <sup>13</sup>C{<sup>1</sup>H} NMR (100 MHz, CDCl<sub>3</sub>, 298 K)  $\delta$  ppm: Me<sub>2</sub>PhSi(Z-CF=C<sup>t</sup>BuCF<sub>3</sub>) and Me<sub>2</sub>PhSi(E-C<sup>t</sup>Bu=CFCF<sub>3</sub>) -0.80 (s, Si-CH<sub>3</sub>), -0.93 (s, Si-CH<sub>3</sub>), 21.10 (s, =C-C-CH<sub>3</sub>), 22.26 (s, =C-C-CH<sub>3</sub>), 31.21 (s, =C-C-CH<sub>3</sub>), 33.94 (s, =C-C-CH<sub>3</sub>), 126.76 (s, Ph), 126.85 (s, Ph), 128.39 (s, Ph), 128.18 (s, Ph), 132.10 (s, Ph), 132.45 (s, Ph), 138.48 (s, Ph), 138.83 (s, Ph). Me<sub>2</sub>PhSi(Z-CF=C<sup>t</sup>BuCF<sub>3</sub>) 122.33 (q.d, <sup>1</sup>J(C<sub>3</sub> 3F) = 285.7 Hz, <sup>3</sup>J(C<sub>3</sub> F<sub>gem</sub>) = 22.1 Hz, C<sub>3</sub>), 139.72 (m, C<sub>2</sub>), 156.99 (d.q, <sup>1</sup>J(C<sub>1</sub> F<sub>gem</sub>) = 208.6 Hz, <sup>3</sup>J(C<sub>1</sub> 3F) = 250.7 Hz, C<sub>1</sub>), Me<sub>2</sub>PhSi(E-C<sup>t</sup>Bu=CFCF<sub>3</sub>) 107.00 (q.d, <sup>1</sup>J(C<sub>3</sub> 3F) = 281.6 Hz, <sup>2</sup>J(C<sub>3</sub> F<sub>trans</sub>) = 50.3 Hz, C<sub>3</sub>), 119.00 (m, C<sub>1</sub>), 145.35 (d.q, <sup>1</sup>J(C<sub>2</sub> F<sub>trans</sub>) = 201.3 Hz, <sup>2</sup>J(C<sub>2</sub> 3F) = 49.0 Hz, C<sub>2</sub>). <sup>29</sup>Si{<sup>1</sup>H} NMR (79 MHz, CDCl<sub>3</sub>, 298 K)  $\delta$  ppm: Me<sub>2</sub>PhSi(Z-CF=C<sup>t</sup>BuCF<sub>3</sub>) -2.45 (d, <sup>2</sup>J(Si F<sub>gem</sub>) = 38.0 Hz); Me<sub>2</sub>PhSi(E-C<sup>t</sup>Bu=CFCF<sub>3</sub>) -1.14 (d, <sup>3</sup>J(Si F<sub>trans</sub>) = 6.6 Hz).  $\nu_{\max}$ /cm<sup>-1</sup> 1255 (Si-C, w), 1320, 1430 (C-F, str), 1645 (C=C, w), 2960, 2870 (C-H, m).

### 2-1-14. Reaction between Me<sub>2</sub>PhSi(E-CF=CFCF<sub>3</sub>) (a.5) and MeLi

Me<sub>2</sub>PhSi(E-CF=CFCF<sub>3</sub>) (a.5) (1.0 g, 3.0 mmol) was dissolved in dry THF (150 mL), MeLi (1.6 M, 9.0 mL, 15.0 mmol) was added slowly. After work up using (G.P2), the product was isolated as a brown liquid. Yield (0.3 g, 1.1 mmol, 36 %); ratio Z:E [Me<sub>2</sub>PhSi(Z-CF=CMeCF<sub>3</sub>) (25Z) 72 : Me<sub>2</sub>PhSi(E-CMe=CFCF<sub>3</sub>) (25E) 28]. Anal.Calcd for C<sub>12</sub>H<sub>14</sub>F<sub>4</sub>Si: C, 54.95; H, 5.38 %. Found: C, 54.63; H, 5.05 %. <sup>19</sup>F{<sup>1</sup>H} NMR (376 MHz, CDCl<sub>3</sub>, 291 K)  $\delta$  ppm: Me<sub>2</sub>PhSi(Z-CF=CMeCF<sub>3</sub>) -60.17 (d, 3F, <sup>4</sup>J(CF<sub>3</sub> F) = 8.2 Hz, CF<sub>3</sub>), -98.95 (q, 1F, <sup>4</sup>J(F CF<sub>3</sub>) = 8.7 Hz, F<sub>gem</sub>) and Me<sub>2</sub>PhSi(E-CMe=CFCF<sub>3</sub>) -67.20 (d, 3F, <sup>3</sup>J(CF<sub>3</sub> F) = 10.5 Hz, CF<sub>3</sub>), -106.91 (q, 1F, <sup>3</sup>J(F CF<sub>3</sub>) = 10.9 Hz, F<sub>trans</sub>). <sup>1</sup>H NMR (400 MHz, CDCl<sub>3</sub>, 291 K)  $\delta$  ppm: Me<sub>2</sub>PhSi(Z-CF=CMeCF<sub>3</sub>) and Me<sub>2</sub>PhSi(E-CMe=CFCF<sub>3</sub>) 0.20 (s, 6H, Si-CH<sub>3</sub>), 0.23 (s, 6H, Si-CH<sub>3</sub>), 1.76 (s, 3H, =C-CH<sub>3</sub>), 1.75 (s, 3H, =C-CH<sub>3</sub>), 7.56 (m, 5H, Ph), 7.65 (m, 5H, Ph). <sup>13</sup>C{<sup>1</sup>H} NMR (100 MHz, CDCl<sub>3</sub>, 298 K)  $\delta$  ppm: Me<sub>2</sub>PhSi(Z-CF=CMeCF<sub>3</sub>) and Me<sub>2</sub>PhSi(E-CMe=CFCF<sub>3</sub>) -4.28 (s, Si-CH<sub>3</sub>), -0.88 (s, Si-CH<sub>3</sub>), 12.92 (s, =C-CH<sub>3</sub>), 14.55 (s, =C-CH<sub>3</sub>), 126.80 (s, Ph), 127.02 (s, Ph), 127.35 (s, Ph), 127.26 (s, Ph), 128.16 (s, Ph), 128.37 (s, Ph), 137.00 (s, Ph), 138.91 (s, Ph), C<sub>1</sub>, C<sub>2</sub> and C<sub>3</sub> in Me<sub>2</sub>PhSi(Z-CF=CMeCF<sub>3</sub>) and Me<sub>2</sub>PhSi(E-CMe=CFCF<sub>3</sub>) were not observed. <sup>29</sup>Si{<sup>1</sup>H} NMR (79 MHz, CDCl<sub>3</sub>, 298 K)  $\delta$  ppm: Me<sub>2</sub>PhSi(Z-CF=CMeCF<sub>3</sub>) 6.10 (d, <sup>2</sup>J(Si F<sub>gem</sub>) = 37.4 Hz); Me<sub>2</sub>PhSi(E-CMe=CFCF<sub>3</sub>) 1.88 (d, <sup>3</sup>J(Si F<sub>trans</sub>) = 5.6 Hz).  $\nu_{\max}$ /cm<sup>-1</sup> 1295 (Si-C, w), 1375, 1465 (C-F, str), 1650 (C=C, w), 2955, 2920, 2870, 2855 (C-H, m).

### 2-1-15. Reaction between Ph<sub>2</sub>MeSi(E-CF=CFCF<sub>3</sub>) (a.6) and <sup>n</sup>BuLi

Ph<sub>2</sub>MeSi(E-CF=CFCF<sub>3</sub>) (a.6) (1.3 g, 4.0 mmol) was dissolved in dry THF (150 mL), <sup>n</sup>BuLi (2.5 M, 3.2 mL, 8.0 mmol) was added slowly. After work up using (G.P2), the product was isolated as a brown liquid. Yield (0.8 g, 2.2 mmol, 73 %); ratio Z:E [Ph<sub>2</sub>MeSi(Z-CF=C<sup>n</sup>BuCF<sub>3</sub>) (26Z) 70 : Ph<sub>2</sub>MeSi(E-C<sup>n</sup>Bu=CFCF<sub>3</sub>) (26E) 30]. Anal.Calcd for C<sub>20</sub>H<sub>22</sub>F<sub>4</sub>Si: C, 65.55; H, 6.06 %. Found: C, 65.93; H, 6.21 %. <sup>19</sup>F{<sup>1</sup>H} NMR (376 MHz, CDCl<sub>3</sub>, 291 K)  $\delta$  ppm: Ph<sub>2</sub>MeSi(Z-CF=C<sup>n</sup>BuCF<sub>3</sub>) -59.31 (d, 3F, <sup>4</sup>J(CF<sub>3</sub> F<sub>gem</sub>) = 8.3 Hz, CF<sub>3</sub>), -97.03 (q, 1F, <sup>4</sup>J(F<sub>gem</sub> CF<sub>3</sub>) = 8.5 Hz, F<sub>gem</sub>) and Ph<sub>2</sub>MeSi(E-C<sup>n</sup>Bu=CFCF<sub>3</sub>) -66.65 (d, 3F, <sup>3</sup>J(CF<sub>3</sub> F<sub>trans</sub>) = 10.4 Hz, CF<sub>3</sub>), -105.47 (q, 1F, <sup>3</sup>J(F<sub>trans</sub> CF<sub>3</sub>) = 10.3 Hz, F<sub>trans</sub>). <sup>1</sup>H NMR (400 MHz, CDCl<sub>3</sub>, 291 K)  $\delta$  ppm: Ph<sub>2</sub>MeSi(Z-CF=C<sup>n</sup>BuCF<sub>3</sub>) and Ph<sub>2</sub>MeSi(E-C<sup>n</sup>Bu=CFCF<sub>3</sub>): 0.46 (s, 3H, Si-CH<sub>3</sub>), 0.49 (s, 3H, Si-CH<sub>3</sub>), 0.58 (t, 3H, <sup>3</sup>J(CH<sub>3</sub> CH<sub>2</sub>) = 6.8 Hz, CH<sub>3</sub>), 0.84 (t, 3H, <sup>3</sup>J(CH<sub>3</sub> CH<sub>2</sub>) = 7.2 Hz, CH<sub>3</sub>), 1.28 (m, 4H, CH<sub>2</sub>CH<sub>2</sub>), 1.43 (m, 4H, CH<sub>2</sub>CH<sub>2</sub>), 3.32 (t, 2H, <sup>3</sup>J(CH<sub>2</sub> CH<sub>2</sub>) = 6.7 Hz, =C-CH<sub>2</sub>), 3.50 (t, 2H, <sup>3</sup>J(CH<sub>2</sub> CH<sub>2</sub>) = 6.5 Hz, =C-CH<sub>2</sub>), 7.30-7.75 (m, 20H, Ph). <sup>13</sup>C{<sup>1</sup>H} NMR (100 MHz, CDCl<sub>3</sub>, 298 K)  $\delta$  ppm: Ph<sub>2</sub>MeSi(Z-CF=C<sup>n</sup>BuCF<sub>3</sub>) and Ph<sub>2</sub>MeSi(E-C<sup>n</sup>Bu=CFCF<sub>3</sub>): -3.88 (s, Si-CH<sub>3</sub>), -3.89 (s, Si-CH<sub>3</sub>), 13.92 (s, =C-CH<sub>2</sub>), 14.54 (s, =C-CH<sub>2</sub>), 23.03 (s, Si-C<sub>3</sub>H<sub>6</sub>-CH<sub>3</sub>), 23.19 (s, Si-C<sub>3</sub>H<sub>6</sub>-CH<sub>3</sub>), 26.66 (s, Si-CH<sub>2</sub>-CH<sub>2</sub>-C<sub>2</sub>H<sub>5</sub>), 27.22 (s, Si-CH<sub>2</sub>-CH<sub>2</sub>-C<sub>2</sub>H<sub>5</sub>), 28.95 (s, Si-C<sub>2</sub>H<sub>4</sub>-CH<sub>2</sub>-CH<sub>3</sub>), 29.07 (s, Si-C<sub>2</sub>H<sub>4</sub>-CH<sub>2</sub>-CH<sub>3</sub>), 128.35 (s, Ph), 128.53 (s, Ph), 129.61 (s, Ph), 130.51 (s, Ph), 133.73 (s, Ph), 134.58 (s, Ph), 135.03 (s, Ph), 135.35 (s, Ph), Ph<sub>2</sub>MeSi(Z-CF=C<sup>n</sup>BuCF<sub>3</sub>) 125.48 (q.d, <sup>1</sup>J(C<sub>3</sub> 3F) = 271.4 Hz,

$^3J(C_3 F_{gem}) = 22.8$  Hz,  $C_3$ ), 139.31 (m,  $C_2$ ), 170.98 (d,q,  $^1J(C_1 F_{gem}) = 285.0$  Hz,  $^3J(C_1 3F) = 6.0$  Hz,  $C_1$ ),  $Ph_2MeSi(E-C^nBu=CFCF_3)$  119.12 (q,d,  $^1J(C_3 3F) = 275.6$  Hz,  $^2J(C_3 F_{trans}) = 49.3$  Hz,  $C_3$ ), 138.11 (m,  $C_1$ ), 149.70 (d,q,  $^1J(C_2 F_{trans}) = 269.6$  Hz,  $^2J(C_2 3F) = 40.5$  Hz,  $C_2$ ).  $^{29}Si\{^1H\}$  NMR (79 MHz,  $CDCl_3$ , 298 K)  $\delta$  ppm:  $Ph_2MeSi(Z-CF=C^nBuCF_3)$  -12.60 (d,  $^2J(Si F_{gem}) = 38.0$  Hz);  $Ph_2MeSi(E-C^nBu=CFCF_3)$ : -9.34 (d,  $^3J(Si F_{trans}) = 12.9$  Hz).  $\nu_{max}/cm^{-1}$  1260 (Si-C, m), 1320, 1430 (C-F, str), 1635 (C=C, w), 2960, 2930, 2870 (C-H, m), 3070 (C-H in Ph, w).

#### 2-1-16. Reaction between $Ph_2MeSi(E-CF=CFCF_3)$ (a.6) and $tBuLi$

$Ph_2MeSi(E-CF=CFCF_3)$  (a.6) (1.3 g, 4.0 mmol) was dissolved in dry THF (150 mL),  $tBuLi$  (1.7 M, 4.7 mL, 8.0 mmol) was added slowly. After work up using (G.P2), the product was isolated as a yellow liquid. Yield (0.5 g, 1.4 mmol, 46 %). Anal.Calcd for  $C_{20}H_{22}F_4Si$ : C, 65.55; H, 6.06 %. Found: C, 65.54; H, 6.54 %.  $^{19}F\{^1H\}$  NMR (376 MHz,  $CDCl_3$ , 291 K)  $\delta$  ppm: -54.77 (d, 3F,  $^4J(CF_3 F_{gem}) = 6.7$  Hz,  $CF_3$ ), -84.52 (q, 1F,  $^4J(F_{gem} CF_3) = 6.7$  Hz,  $F_{gem}$ ).  $^1H$  NMR (400 MHz,  $CDCl_3$ , 291 K)  $\delta$  ppm: 0.49 (s, 3H, Si- $CH_3$ ), 1.24 (s, 9H, C- $CH_3$ ), 7.30-7.42 (m, 10H, Ph).  $^{13}C\{^1H\}$  NMR (100 MHz,  $CDCl_3$ , 298 K)  $\delta$  ppm: -2.05 (s, Si- $CH_3$ ), 30.50 (s, =C-C- $CH_3$ ), 35.82 (s, =C-C- $CH_3$ ), 125.57 (q,d,  $^1J(C_3 3F) = 274.3$  Hz,  $^3J(C_3 F_{gem}) = 26.8$  Hz, 3F,  $C_3$ ), 128.39 (s, Ph), 129.73 (s, Ph), 134.59 (s, Ph), 135.10 (s, Ph), 139.14 (q,d,  $^2J(C_2 3F) = 25.3$  Hz,  $^2J(C_2 3F) = 12.8$  Hz,  $C_2$ ), 172.78 (d,q,  $^1J(C_1 F_{gem}) = 290.2$  Hz,  $^3J(C_1 3F) = 8.7$  Hz,  $C_1$ ).  $^{29}Si\{^1H\}$  NMR (79 MHz,  $CDCl_3$ , 298 K)  $\delta$  ppm: -10.03 (d,  $^2J(Si F_{gem}) = 37.5$  Hz).  $\nu_{max}/cm^{-1}$  1255 (Si-C, m), 1360, 1425 (C-F, str), 1600 (C=C, w), 2965 (C-H, w), 3075 (C-H in Ph, w).

#### 2-1-17. Reaction between $Ph_2MeSi(E-CF=CFCF_3)$ (3.6) and MeLi

$Ph_2MeSi(E-CF=CFCF_3)$  (a.6) (1.0 g, 3.0 mmol) was dissolved in dry THF (150 mL), MeLi (1.6 M, 9 mL, 15 mmol) was added slowly. After work up using (G.P2), the product was isolated as a brown liquid. Yield (0.6 g, 1.9 mmol, 63 %); ratio Z:E [ $Ph_2MeSi(Z-CF=CMeCF_3)$  (28Z) 52 :  $Ph_2MeSi(E-CMe=CFCF_3)$  (28E) 48]. Anal.Calcd for  $C_{17}H_{16}F_4Si$ : C, 62.94; H, 4.98 %. Found: C, 62.55; H, 4.63 %.  $^{19}F\{^1H\}$  NMR (376 MHz,  $CDCl_3$ , 291 K)  $\delta$  ppm:  $Ph_2MeSi(Z-CF=CMeCF_3)$  -61.46 (d, 3F,  $^4J(CF_3 F_{gem}) = 7.9$  Hz,  $CF_3$ ), -96.13 (q, 1F,  $^4J(F CF_3) = 7.7$  Hz,  $F_{gem}$ ) and  $Ph_2MeSi(E-CMe=CFCF_3)$  -66.37 (d, 3F,  $^3J(CF_3 F_{trans}) = 10.4$  Hz,  $CF_3$ ), -103.41 (q, 1F,  $^3J(F_{trans} CF_3) = 10.7$  Hz,  $F_{trans}$ ).  $^1H$  NMR (400 MHz,  $CDCl_3$ , 291 K)  $\delta$  ppm:  $Ph_2MeSi(Z-CF=CMeCF_3)$  and  $Ph_2MeSi(E-CMe=CFCF_3)$ : 0.18 (s, 3H, Si- $CH_3$ ), 0.25 (s, 3H, Si- $CH_3$ ), 0.47 (s, 3H, =C- $CH_3$ ), 0.49 (s, 3H, =C- $CH_3$ ), 7.30-7.60 (m, 20H, Ph).  $^{13}C\{^1H\}$  NMR (100 MHz,  $CDCl_3$ , 298 K)  $\delta$  ppm:  $Ph_2MeSi(Z-CF=CMeCF_3)$  and  $Ph_2MeSi(E-CMe=CFCF_3)$ : -0.91 (s, Si- $CH_3$ ), -0.27 (s, Si- $CH_3$ ), 1.25 (s, =C- $CH_3$ ), 1.84 (s, =C- $CH_3$ ), 128.54 (s, Ph), 129.00 (s, Ph), 130.11 (s, Ph), 130.18 (s, Ph), 131.46 (s, Ph), 131.95 (s, Ph), 139.94 (s, Ph), 140.55 (s, Ph),  $Ph_2MeSi(Z-CF=CMeCF_3)$  126.35 (q,d,  $^1J(C_3 3F) = 213.0$  Hz,  $^3J(C_3 F_{gem}) = 21.9$  Hz,  $C_3$ ), 141.84 (m,  $C_2$ ), 171.82 (d,q,  $^1J(C_1 F_{gem}) = 171.8$  Hz,  $^3J(C_1 3F) = 7.0$  Hz,  $C_1$ ),  $Ph_2MeSi(E-CMe=CFCF_3)$ : 120.60 (q,d,  $^1J(C_3 3F) = 275.6$  Hz,  $^2J(C_3 F_{trans}) = 49.3$  Hz,  $C_3$ ), 135.65 (m,  $C_1$ ), 149.70 (d,q,  $^1J(C_2 F_{trans}) = 278.3$  Hz,  $^2J(C_2 3F) = 47.3$  Hz,  $C_2$ ).  $^{29}Si\{^1H\}$  NMR (79 MHz,  $CDCl_3$ , 298K)  $\delta$  ppm:  $Ph_2MeSi(Z-CF=CMeCF_3)$  -21.19 (d,  $^2J(Si F_{gem}) = 37.3$  Hz);  $Ph_2MeSi(E-CMe=CFCF_3)$ : -10.99 (d,  $^3J(Si F_{trans}) = 5.3$  Hz).  $\nu_{max}/cm^{-1}$  1250 (Si-C, m), 1365, 1435 (C-F, str), 1600 (C=C, w), 3070 (C-H in Ph, w), 2960 (C-H, w).

#### 2-1-18. Reaction between $Ph_2MeSi(E-CF=CFCF_3)$ (a.6) and PhLi

$Ph_2MeSi(E-CF=CFCF_3)$  (a.6) (1.0 g, 3.0 mmol) was dissolved in dry THF (150 mL), PhLi (2.0 M, 7.5 mL, 15.0 mmol) was added slowly. After work up using (G.P2), the product was isolated as a brown liquid. Yield (0.7 g, 1.8 mmol, 60 %). Anal.Calcd for  $C_{22}H_{18}F_4Si$ : C, 68.37; H, 4.70 %. Found: C, 68.73; H, 4.90 %.  $^{19}F\{^1H\}$  NMR (376 MHz,  $CDCl_3$ , 291 K)  $\delta$  ppm: -61.13 (d, 3F,  $^4J(CF_3 F_{gem}) = 9.6$  Hz,  $CF_3$ ), -79.91 (q, 1F,  $^4J(F_{gem} CF_3) = 9.5$  Hz,  $F_{gem}$ ).  $^1H$  NMR (400 MHz,  $CDCl_3$ , 291 K)  $\delta$  ppm: 1.18 (s, 3H,  $CH_3$ ), 7.39-7.41 (m, 15H, Ph).  $^{13}C\{^1H\}$  NMR (100 MHz,  $CDCl_3$ , 298 K)  $\delta$  ppm: -0.85 (s, Si- $CH_3$ ), 127.26 (s, Ph), 127.35 (s, Ph), 127.51 (s, Ph), 127.84 (s, Ph), 128.29 (s, Ph), 128.71 (s, Ph), 129.75 (s, Ph), 130.09 (s, Ph),  $C_1$ ,  $C_2$  and  $C_3$  were not observed.  $^{29}Si\{^1H\}$  NMR (79 MHz,  $CDCl_3$ , 298 K)  $\delta$  ppm: -22.29 (d,  $^2J(Si F_{gem}) = 36.3$  Hz).  $\nu_{max}/cm^{-1}$  1270 (Si-C,w), 1305, 1440 (C-F, str), 1650 (C=C, w), 2990 (C-H, w), 3010, 3020 (C-H in Ph, m).

#### 2-1-19. Reaction between $Me_2Si(E-CF=CFCF_3)_2$ (a.7) and $nBuLi$

$Me_2Si(E-CF=CFCF_3)_2$  (a.7) (1.2 g, 4.0 mmol) was dissolved in dry THF (150 mL),  $nBuLi$  (2.5 M, 6.4 mL, 16.0 mmol) was added slowly. After work up using (G.P2), the product was isolated as a brown liquid. Yield (0.4 g, 1.0 mol, 33 %); ratio Z:E [ $Me_2Si(Z-CF=C^nBuCF_3)_2$  (30Z) 50 :  $Me_2Si(E-C^nBu=CFCF_3)_2$  (30E) 50].  $^{19}F\{^1H\}$  NMR (376 MHz,  $CDCl_3$ , 291 K)  $\delta$  ppm:  $Me_2Si(Z-CF=C^nBuCF_3)_2$  -59.71 (d, 6F,  $^4J(CF_3 F_{gem}) = 8.4$  Hz,  $CF_3$ ), -100.32 (q, 2F,  $^4J(F_{gem} CF_3) = 8.5$  Hz,  $F_{gem}$ ) and

Me<sub>2</sub>Si(E-C<sup>n</sup>Bu=CFCF<sub>3</sub>)<sub>2</sub> -66.79 (d, 6F, <sup>3</sup>J(CF<sub>3</sub> F<sub>trans</sub>) = 10.5 Hz, CF<sub>3</sub>), -108.51 (q, 2F, <sup>3</sup>J(F<sub>trans</sub> CF<sub>3</sub>) = 10.0 Hz, F<sub>trans</sub>). <sup>1</sup>H NMR (400 MHz, CDCl<sub>3</sub>, 291 K) δ ppm: Me<sub>2</sub>Si(Z-CF=C<sup>n</sup>BuCF<sub>3</sub>)<sub>2</sub> and Me<sub>2</sub>Si(E-C<sup>n</sup>Bu=CFCF<sub>3</sub>)<sub>2</sub> 0.11 (s, 6H, Si-CH<sub>3</sub>), 0.14 (s, 6H, Si-CH<sub>3</sub>), 0.18 (t, 6H, <sup>3</sup>J(CH<sub>3</sub> CH<sub>2</sub>) = 7.2 Hz, CH<sub>3</sub>) 0.91 (t, 6H, <sup>3</sup>J(CH<sub>3</sub> CH<sub>2</sub>) = 7.4 Hz, CH<sub>3</sub>), 1.25 (m, 8H, CH<sub>2</sub>CH<sub>2</sub>), 1.47 (m, 8H, CH<sub>2</sub>CH<sub>2</sub>), 2.15 (m, 4H, =C-CH<sub>2</sub>), 2.20 (m, 4H, =C-CH<sub>2</sub>). <sup>13</sup>C{<sup>1</sup>H} NMR (100 MHz, CDCl<sub>3</sub>, 298 K) δ ppm: Me<sub>2</sub>Si(Z-CF=C<sup>n</sup>BuCF<sub>3</sub>)<sub>2</sub> and Me<sub>2</sub>Si(E-C<sup>n</sup>Bu=CFCF<sub>3</sub>)<sub>2</sub> -4.39 (s, Si-CH<sub>3</sub>), -2.99 (s, Si-CH<sub>3</sub>), 12.56 (s, =C-CH<sub>2</sub>), 12.78 (s, =C-CH<sub>2</sub>), 24.68 (s, =C-C<sub>2</sub>H<sub>2</sub>-CH<sub>2</sub>-CH<sub>3</sub>), 24.96 (s, =C-C<sub>2</sub>H<sub>2</sub>-CH<sub>2</sub>-CH<sub>3</sub>), 25.25 (s, =C-CH<sub>2</sub>-CH<sub>2</sub>-C<sub>2</sub>H<sub>5</sub>), 25.40 (s, =C-CH<sub>2</sub>-CH<sub>2</sub>-C<sub>2</sub>H<sub>5</sub>), Me<sub>2</sub>Si(Z-CF=C<sup>n</sup>BuCF<sub>3</sub>)<sub>2</sub>: 124.23 (q.d, <sup>1</sup>J(C<sub>3</sub> 3F) = 266.8 Hz, <sup>3</sup>J(C<sub>3</sub> F<sub>gem</sub>) = 26.0 Hz, C<sub>3</sub>), 126.13 (m, C<sub>2</sub>), 172.81 (d.q <sup>1</sup>J(C<sub>1</sub> F<sub>gem</sub>) = 286.9 Hz, <sup>3</sup>J(C<sub>1</sub> 3F) = 7.4 Hz, C<sub>1</sub>); Me<sub>2</sub>Si(E-C<sup>n</sup>Bu=CFCF<sub>3</sub>)<sub>2</sub>: 117.90 (q.d, <sup>1</sup>J(C<sub>3</sub> 3F) = 271.9 Hz, <sup>2</sup>J(C<sub>3</sub> F<sub>trans</sub>) = 50.0 Hz, C<sub>3</sub>), 121.57 (m, C<sub>1</sub>), 146.37 (d.q, <sup>1</sup>J(C<sub>2</sub> F<sub>trans</sub>) = 265.3 Hz, <sup>2</sup>J(C<sub>2</sub> 3F) = 39.8 Hz, C<sub>2</sub>). <sup>29</sup>Si{<sup>1</sup>H} NMR (79 MHz, CDCl<sub>3</sub>, 298 K) δ ppm: Me<sub>2</sub>Si(E-C<sup>n</sup>Bu=CFCF<sub>3</sub>)<sub>2</sub>: -0.57 (m); Me<sub>2</sub>Si(Z-CF=C<sup>n</sup>BuCF<sub>3</sub>)<sub>2</sub>: -21.93 (m). ν<sub>max</sub>/cm<sup>-1</sup> 1250 (Si-C, w), 1380, 1460 (C-F, str), 1650 (C=C, w), 2970, 2930 (C-H, m).

### 2-1-20. Reaction between Me<sub>2</sub>Si(E-CF=CFCF<sub>3</sub>)<sub>2</sub> (a.7) and <sup>t</sup>BuLi

Me<sub>2</sub>Si(E-CF=CFCF<sub>3</sub>)<sub>2</sub> (a.7) (1.2 g, 4.0 mmol) was dissolved in dry THF (150 mL), <sup>t</sup>BuLi (1.7 M, 9.4 mL, 16.0 mmol) was added slowly. After work up using (G.P2), the product was isolated as a brown liquid. Yield (0.6 g, 1.5 mmol, 50 %). <sup>19</sup>F{<sup>1</sup>H} NMR (376 MHz, CDCl<sub>3</sub>, 291 K) δ ppm: -55.18 (d, 6F, <sup>4</sup>J(CF<sub>3</sub> F<sub>gem</sub>) = 7.2 Hz, CF<sub>3</sub>), -88.23 (q, 2F, <sup>4</sup>J(F<sub>gem</sub> CF<sub>3</sub>) = 7.5 Hz, F<sub>gem</sub>). <sup>1</sup>H NMR (400 MHz, CDCl<sub>3</sub>, 298 K) δ ppm: -0.13 (s, 6H, Si-CH<sub>3</sub>), 1.07 (s, 18H, C-CH<sub>3</sub>). <sup>13</sup>C{<sup>1</sup>H} NMR (100 MHz, CDCl<sub>3</sub>, 298 K) δ ppm: -3.74 (s, Si-CH<sub>3</sub>), 12.69 (s, C-CH<sub>3</sub>), 28.89 (s, C-CH<sub>3</sub>), 124.48 (q.d, <sup>1</sup>J(C<sub>3</sub> 3F) = 272.5 Hz, <sup>3</sup>J(C<sub>3</sub> F<sub>gem</sub>) = 27.9 Hz, C<sub>3</sub>), 131 (q.d, <sup>2</sup>J(C<sub>2</sub> 3F) = 24.7 Hz, <sup>2</sup>J(C<sub>2</sub> F<sub>gem</sub>) = 12.9 Hz, C<sub>2</sub>), 174.78 (d.q <sup>1</sup>J(C<sub>1</sub> F<sub>gem</sub>) = 293.8 Hz, <sup>3</sup>J(C<sub>1</sub> 3F) = 9.3 Hz, C<sub>1</sub>). <sup>29</sup>Si{<sup>1</sup>H} NMR (79 MHz, CDCl<sub>3</sub>, 298 K) δ ppm: 1.80 (m). ν<sub>max</sub>/cm<sup>-1</sup> 2960 (C-H, w), 1665 (C=C, w), 1365, 1465 (C-F, str), 1260 (Si-C, w).

### 2-1-21. Reaction between Me<sub>2</sub>Si(E-CF=CFCF<sub>3</sub>)<sub>2</sub> (a.7) and MeLi

Me<sub>2</sub>Si(E-CF=CFCF<sub>3</sub>)<sub>2</sub> (a.7) (1.5 g, 3.0 mmol) was dissolved in dry THF (150 mL), MeLi (1.6 M, 18.0 mL, 30 mmol) was added slowly. After work up using (G.P2), the product was isolated as yellow liquid. Yield (0.5 g, 1.5 mmol, 50 %); ratio Z:E [Me<sub>2</sub>Si(Z-CF=CMeCF<sub>3</sub>)<sub>2</sub> (32Z) 40 : Me<sub>2</sub>Si(E-CMe=CFCF<sub>3</sub>)<sub>2</sub> (32E) 60]. <sup>19</sup>F{<sup>1</sup>H} NMR (376 MHz, CDCl<sub>3</sub>, 291 K) δ ppm: Me<sub>2</sub>Si(Z-CF=CMeCF<sub>3</sub>)<sub>2</sub> -62.05 (d, 6F, <sup>4</sup>J(CF<sub>3</sub> F<sub>gem</sub>) = 8.6 Hz, CF<sub>3</sub>), -99.44 (q, 2F, <sup>4</sup>J(F<sub>gem</sub> CF<sub>3</sub>) = 8.5 Hz, F<sub>gem</sub>) and Me<sub>2</sub>Si(E-CMe=CFCF<sub>3</sub>)<sub>2</sub> -66.75 (d, 2F, <sup>3</sup>J(CF<sub>3</sub> F<sub>trans</sub>) = 10.3 Hz, CF<sub>3</sub>), -107.19 (q, 1F, <sup>3</sup>J(F<sub>trans</sub> CF<sub>3</sub>) = 10.4 Hz, F<sub>trans</sub>). <sup>1</sup>H NMR (400 MHz, CDCl<sub>3</sub>, 291 K) δ ppm: Me<sub>2</sub>Si(Z-CF=CMeCF<sub>3</sub>)<sub>2</sub> and Me<sub>2</sub>Si(E-CMe=CFCF<sub>3</sub>)<sub>2</sub>: 0.10 (s, 6H, Si-CH<sub>3</sub>), 0.14 (s, 6H, Si-CH<sub>3</sub>), 1.74 (s, 6H, =C-CH<sub>3</sub>), 1.88 (s, 6H, =C-CH<sub>3</sub>). <sup>13</sup>C{<sup>1</sup>H} NMR (100 MHz, CDCl<sub>3</sub>, 298 K) δ ppm: Me<sub>2</sub>Si(Z-CF=CMeCF<sub>3</sub>)<sub>2</sub> and Me<sub>2</sub>Si(E-CMe=CFCF<sub>3</sub>)<sub>2</sub>: -0.38 (s, Si-CH<sub>3</sub>), -0.44 (s, Si-CH<sub>3</sub>), 0.37 (s, =C-CH<sub>3</sub>), 0.71 (s, =C-CH<sub>3</sub>); Me<sub>2</sub>Si(E-CMe=CFCF<sub>3</sub>)<sub>2</sub>: 114.98 (q.d, <sup>1</sup>J(C<sub>3</sub> 3F) = 22.3 Hz, <sup>2</sup>J(C<sub>3</sub> F<sub>trans</sub>) = 49.4 Hz, C<sub>3</sub>), 116.92 (m, C<sub>1</sub>), 146.05 (d.q, <sup>1</sup>J(C<sub>2</sub> F<sub>trans</sub>) = 228.5 Hz, <sup>2</sup>J(C<sub>2</sub> 3F) = 38.0 Hz C<sub>2</sub>); and C<sub>2</sub>, C<sub>2</sub>, C<sub>3</sub> in Me<sub>2</sub>Si(Z-CF=CMeCF<sub>3</sub>)<sub>2</sub> were not observed. <sup>29</sup>Si{<sup>1</sup>H} NMR (79 MHz, CDCl<sub>3</sub>, 298 K) δ ppm: Me<sub>2</sub>Si(Z-CF=CMeCF<sub>3</sub>)<sub>2</sub> -22.76 (m); Me<sub>2</sub>Si(E-CMe=CFCF<sub>3</sub>)<sub>2</sub>: -21.94 (m). ν<sub>max</sub>/cm<sup>-1</sup> 1265 (Si-C, w), 1345, 1455 (C-F, str), 1660 (C=C, w), 2980 (C-H, m).

### 2-1-22. Reaction between <sup>i</sup>Pr<sub>2</sub>Si(E-CF=CFCF<sub>3</sub>)<sub>2</sub> (a.8) and <sup>n</sup>BuLi

<sup>i</sup>Pr<sub>2</sub>Si(E-CF=CFCF<sub>3</sub>)<sub>2</sub> (a.8) (1.6 g, 4.0 mmol) was dissolved in dry THF (150 mL), <sup>n</sup>BuLi (2.5 M, 6.4 mL, 16.0 mmol). After work up using (G.P2), the product was isolated as a yellow liquid. Yield (0.4 g, 0.8 mmol, 40 %). <sup>19</sup>F{<sup>1</sup>H} NMR (376 MHz, CDCl<sub>3</sub>, 291 K) δ ppm: -61.98 (d, 6F, <sup>4</sup>J(CF<sub>3</sub> F<sub>gem</sub>) = 8.6 Hz, CF<sub>3</sub>), -101.26 (q, 2F, <sup>4</sup>J(F CF<sub>3</sub>) = 8.4 Hz, F<sub>gem</sub>). <sup>1</sup>H NMR (400 MHz, CDCl<sub>3</sub>, 291 K) δ ppm: 0.89 (t, 6H, <sup>3</sup>J(CH<sub>3</sub> CH<sub>2</sub>) = 7.5 Hz, CH<sub>3</sub>), 1.02 (d, 12H, <sup>3</sup>J(CH<sub>3</sub> CH) = 7.5 Hz, Si-CH-CH<sub>3</sub>), 2.25 (m, 2H, Si-CH), 1.25 (m, 8H, CH<sub>2</sub>-CH<sub>2</sub>), 3.62 (t, 4H, <sup>3</sup>J(CH<sub>2</sub> CH<sub>2</sub>) = 6.2 Hz, =C-CH<sub>2</sub>). <sup>13</sup>C{<sup>1</sup>H} NMR (100 MHz, CDCl<sub>3</sub>, 298 K) δ ppm: 11.46 (s, Si-CH), 13.58 (s, =C-CH<sub>2</sub>), 14.32 (s, =C-C<sub>3</sub>H<sub>6</sub>-CH<sub>3</sub>), 17.15 (s, Si-CH-CH<sub>3</sub>), 22.56 (s, =C-CH<sub>2</sub>-CH<sub>2</sub>-C<sub>2</sub>H<sub>5</sub>), 26.86 (s, =C-C<sub>2</sub>H<sub>4</sub>-CH<sub>2</sub>-CH<sub>3</sub>), 124.63 (q.d, <sup>1</sup>J(C<sub>3</sub> 3F) = 272.2 Hz, <sup>3</sup>J(C<sub>3</sub> F<sub>gem</sub>) = 24.6 Hz, C<sub>3</sub>), 128.58 (m, C<sub>2</sub>), 167.90 (d.q, <sup>1</sup>J(C<sub>1</sub> F<sub>gem</sub>) = 286.7 Hz, <sup>3</sup>J(C<sub>1</sub> 3F) = 7.6 Hz, C<sub>1</sub>). <sup>29</sup>Si{<sup>1</sup>H} NMR (79 MHz, CDCl<sub>3</sub>, 298 K) δ ppm: -3.27 (m). ν<sub>max</sub>/cm<sup>-1</sup> 1245 (Si-C, m), 1340, 1460 (C-F, str), 1600 (C=C, w), 2950, 2865 (C-H, m).

### 2-1-23. Reaction between ${}^i\text{Pr}_2\text{Si}(\text{E-CF}=\text{CFCF}_3)_2$ (a.8) and ${}^t\text{BuLi}$

${}^i\text{Pr}_2\text{Si}(\text{CF}=\text{CFCF}_3)_2$  (a.8) (1.6 g, 4.0 mmol) was dissolved in dry THF (150 mL),  ${}^t\text{BuLi}$  (1.7 M, 9.4 mL, 16.0 mmol) was added slowly. After work up using (G.P2), the product was isolated as a yellow liquid. Yield (0.5 g, 1.0 mmol, 50 %).  ${}^{19}\text{F}\{^1\text{H}\}$  NMR (376 MHz,  $\text{CDCl}_3$ , 291 K)  $\delta$  ppm: -56.61 (d, 6F,  ${}^4J(\text{CF}_3 \text{F}_{\text{gem}}) = 6.5$  Hz,  $\text{CF}_3$ ), -89.0 (q, 2F,  ${}^4J(\text{F}_{\text{gem}} \text{CF}_3) = 5.9$  Hz,  $\text{F}_{\text{gem}}$ ).  ${}^1\text{H}$  NMR (400 MHz,  $\text{CDCl}_3$ , 291 K)  $\delta$  ppm: 0.98 (d, 12H,  ${}^3J(\text{CH}_3 \text{CH}) = 6.4$  Hz,  $\text{CH}_3$ ), 1.22 (s, 18H, C- $\text{CH}_3$ ), 1.87 (m, 2H, CH).  ${}^{13}\text{C}\{^1\text{H}\}$  NMR (100 MHz,  $\text{CDCl}_3$ , 298 K)  $\delta$  ppm: 12.01 (s, C- $\text{CH}_3$ ) 13.30 (s, Si-CH), 16.20 (s, CH-C $\text{H}_3$ ), 28.1 (s, C- $\text{CH}_3$ ), 123.50 (q.d,  ${}^1J(\text{C}_3 \text{3F}) = 272.6$  Hz,  ${}^3J(\text{C}_3 \text{F}_{\text{gem}}) = 26.5$  Hz,  $\text{C}_3$ ), 134.78 (m,  $\text{C}_2$ ), 153.75 (d.q,  ${}^1J(\text{C}_1 \text{F}_{\text{gem}}) = 282.5$  Hz,  ${}^3J(\text{C}_1 \text{3F}) = 5.54$  Hz,  $\text{C}_1$ ).  ${}^{29}\text{Si}\{^1\text{H}\}$  NMR (79 MHz,  $\text{CDCl}_3$ , 298 K)  $\delta$  ppm: -12.80 (m).  $\nu_{\text{max}}/\text{cm}^{-1}$  1200 (Si-C, w), 1360, 1465 (C-F, str), 1665 (C=C, w), 2950, 2870 (C-H, m).

### 2-1-24. Reaction between ${}^i\text{Pr}_2\text{Si}(\text{E-CF}=\text{CFCF}_3)_2$ (a.8) and MeLi

${}^i\text{Pr}_2\text{Si}(\text{E-CF}=\text{CFCF}_3)_2$  (a.8) (1.0 g, 2.0 mmol) was dissolved in dry THF (150 mL), MeLi (1.6 M, 12.5 mL, 20.0 mmol) was added slowly. After work up using (G.P2), the product was isolated as a yellow liquid. Yield (0.3 g, 0.8 mmol, 40 %).  ${}^{19}\text{F}\{^1\text{H}\}$  NMR (376 MHz,  $\text{CDCl}_3$ , 291 K)  $\delta$  ppm: -67.53 (m, 6F,  $\text{CF}_3$ ), -139.77 (m, 2F,  $\text{F}_{\text{gem}}$ ).  ${}^1\text{H}$  NMR (400 MHz,  $\text{CDCl}_3$ , 291 K)  $\delta$  ppm: 1.07 (d, 12H,  ${}^3J(\text{CH}_3 \text{CH}) = 5.0$  Hz,  $\text{CH}_3$ ), 1.81 (m, 2H, Si-CH), 2.42 (s, 6H, =C- $\text{CH}_3$ ).  ${}^{13}\text{C}\{^1\text{H}\}$  NMR (100 MHz,  $\text{CDCl}_3$ , 298 K)  $\delta$  ppm: 13.36 (s, =C- $\text{CH}_3$ ) 16.00 (s, Si-CH), 16.19 (s, CH-C $\text{H}_3$ ), 99.81 (q.d,  ${}^1J(\text{C}_3 \text{3F}) = 246.6$  Hz,  ${}^3J(\text{C}_3 \text{F}_{\text{gem}}) = 36.8$  Hz,  $\text{C}_3$ ), 102.77 (m,  $\text{C}_2$ ), 161.25 (d  ${}^1J(\text{C}_1 \text{F}_{\text{gem}}) = 217.2$  Hz,  $\text{C}_1$ ).  ${}^{29}\text{Si}\{^1\text{H}\}$  NMR (79 MHz,  $\text{CDCl}_3$ , 298 K)  $\delta$  ppm: -13.16 (m).  $\nu_{\text{max}}/\text{cm}^{-1}$  1260 (Si-C, w), 1360, 1465 (C-F, str), 1660 (C=C, w), 2945, 2870 (C-H, m).

### 2-1-25. Reaction between $\text{Ph}_2\text{Si}(\text{E-CF}=\text{CFCF}_3)_2$ (a.9) and ${}^n\text{BuLi}$

$\text{Ph}_2\text{Si}(\text{E-CF}=\text{CFCF}_3)_2$  (a.9) (1.0 g, 2.0 mmol) was dissolved in dry THF (150 mL),  ${}^n\text{BuLi}$  (2.5 M, 3.2 mL, 8.0 mmol) was added slowly. After work up using (G.P2), the product was isolated as a yellow liquid. Yield (0.8 g, 1.5 mmol, 75 %); ratio Z:E [ $\text{Ph}_2\text{Si}(\text{Z-CF}=\text{C}^n\text{BuCF}_3)_2$  (36Z) 77 :  $\text{Ph}_2\text{Si}(\text{E-C}^n\text{Bu}=\text{CFCF}_3)_2$  (36E) 23]. Anal.Calcd for  $\text{C}_{26}\text{H}_{28}\text{F}_8\text{Si}$ : C, 59.98; H, 5.42 %. Found: C, 59.92; H, 5.22 %.  ${}^{19}\text{F}\{^1\text{H}\}$  NMR (376 MHz,  $\text{CDCl}_3$ , 291 K)  $\delta$  ppm:  $\text{Ph}_2\text{Si}(\text{Z-CF}=\text{C}^n\text{BuCF}_3)_2$  -59.93 (d, 3F,  ${}^4J(\text{CF}_3 \text{F}_{\text{gem}}) = 7.7$  Hz,  $\text{CF}_3$ ), -97.61 (q, 1F,  ${}^4J(\text{F}_{\text{gem}} \text{CF}_3) = 8.0$  Hz,  $\text{F}_{\text{gem}}$ ) and  $\text{Ph}_2\text{Si}(\text{E-C}^n\text{Bu}=\text{CFCF}_3)_2$  -67.02 (d, 3F,  ${}^3J(\text{CF}_3 \text{F}_{\text{trans}}) = 10.5$  Hz,  $\text{CF}_3$ ), -105.09 (q, 1F,  ${}^3J(\text{F}_{\text{trans}} \text{CF}_3) = 10.8$  Hz,  $\text{F}_{\text{trans}}$ ).  ${}^1\text{H}$  NMR (400 MHz,  $\text{CDCl}_3$ , 291 K)  $\delta$  ppm:  $\text{Ph}_2\text{Si}(\text{Z-CF}=\text{C}^n\text{BuCF}_3)_2$  and  $\text{Ph}_2\text{Si}(\text{E-C}^n\text{Bu}=\text{CFCF}_3)_2$ : 0.79 (t, 6H,  ${}^3J(\text{CH}_3 \text{CH}_2) = 7.1$  Hz,  $\text{CH}_3$ ), 0.86 (t, 6H,  ${}^3J(\text{CH}_3 \text{CH}_2) = 7.3$  Hz,  $\text{CH}_3$ ), 1.30 (m, 8H,  $\text{CH}_2\text{CH}_2$ ), 1.44 (m, 8H,  $\text{CH}_2\text{CH}_2$ ), 2.42 (t, 4H,  ${}^3J(\text{CH}_2 \text{CH}_2) = 7.7$  Hz, =C- $\text{CH}_2$ ), 2.49 (t, 4H,  ${}^3J(\text{CH}_2 \text{CH}_2) = 6.9$  Hz, =C- $\text{CH}_2$ ), 7.32-7.63 (m, 20H, Ph).  ${}^{13}\text{C}\{^1\text{H}\}$  NMR (100 MHz,  $\text{CDCl}_3$ , 298 K)  $\delta$  ppm:  $\text{Ph}_2\text{Si}(\text{Z-CF}=\text{C}^n\text{BuCF}_3)_2$  and  $\text{Ph}_2\text{Si}(\text{E-C}^n\text{Bu}=\text{CFCF}_3)_2$ : 11.28 (s, =C- $\text{CH}_2$ ), 11.82 (s, =C- $\text{CH}_2$ ), 12.51 (s, =C- $\text{C}_3\text{H}_6$ - $\text{CH}_3$ ), 12.66 (s, =C- $\text{C}_3\text{H}_6$ - $\text{CH}_3$ ), 24.76 (s, =C- $\text{C}_4\text{H}_4$ - $\text{CH}_2$ - $\text{CH}_3$ ), 25.46 (s, =C- $\text{C}_4\text{H}_4$ - $\text{CH}_2$ - $\text{CH}_3$ ), 28.37 (s, =C- $\text{CH}_2$ - $\text{CH}_2$ - $\text{C}_2\text{H}_5$ ), 29.82 (s, =C- $\text{CH}_2$ - $\text{CH}_2$ - $\text{C}_2\text{H}_5$ ), 126.63 (s, Ph), 126.69 (s, Ph), 126.78 (s, Ph), 126.86 (s, Ph), 128.55 (s, Ph), 128.81 (s, Ph), 133.83 (s, Ph), 134.05 (s, Ph).  $\text{Ph}_2\text{Si}(\text{Z-CF}=\text{C}^n\text{BuCF}_3)_2$ : 123.80 (q.d,  ${}^1J(\text{C}_3 \text{3F}) = 272.0$  Hz,  ${}^3J(\text{C}_3 \text{F}_{\text{gem}}) = 24.0$  Hz,  $\text{C}_3$ ), 146.73 (m,  $\text{C}_2$ ), 169.14 (d.q  ${}^1J(\text{C}_1 \text{F}_{\text{gem}}) = 286.0$  Hz,  ${}^3J(\text{C}_1 \text{3F}) = 6.8$  Hz,  $\text{C}_1$ ).  $\text{Ph}_2\text{Si}(\text{E-C}^n\text{Bu}=\text{CFCF}_3)_2$ : 117.79 (q.d,  ${}^1J(\text{C}_3 \text{3F}) = 271.2$  Hz,  ${}^2J(\text{C}_3 \text{F}_{\text{trans}}) = 49.5$  Hz,  $\text{C}_3$ ), 141.57 (m,  $\text{C}_1$ ), 178.53 (d,  ${}^1J(\text{C}_2 \text{F}_{\text{trans}}) = 273$  Hz,  $\text{C}_2$ ).  ${}^{29}\text{Si}\{^1\text{H}\}$  NMR (79 MHz,  $\text{CDCl}_3$ , 298 K)  $\delta$  ppm:  $\text{Ph}_2\text{Si}(\text{Z-CF}=\text{C}^n\text{BuCF}_3)_2$  -11.95 (m);  $\text{Ph}_2\text{Si}(\text{E-C}^n\text{Bu}=\text{CFCF}_3)_2$ : -9.25 (m).  $\nu_{\text{max}}/\text{cm}^{-1}$  1230 (Si-C, w), 1660 (C=C, w), 1360, 1430 (C-F, str), 2960 (C-H, m), 3050 (C-H in Ph, w).

### 2-1-26. Reaction between $\text{Ph}_2\text{Si}(\text{E-CF}=\text{CFCF}_3)_2$ (a.9) and PhLi

$\text{Ph}_2\text{Si}(\text{E-CF}=\text{CFCF}_3)_2$  (a.9) (1.0 g, 2.0 mmol) was dissolved in dry THF (150 mL), PhLi (2.0 M, 15.0 mL, 20.0 mmol) was added slowly. The product was isolated as a yellow liquid after work up and purified by column chromatography on silica with a chloroform eluent. Yield (0.3 g, 0.5 mmol, 25 %). Anal.Calcd for  $\text{C}_{30}\text{H}_{20}\text{F}_8\text{Si}$ : C, 64.27; H, 3.60 %. Found: C, 64.45; H, 3.08 %.  ${}^{19}\text{F}\{^1\text{H}\}$  NMR (376 MHz,  $\text{CDCl}_3$ , 291 K)  $\delta$  ppm: -57.84 (d, 6F,  ${}^4J(\text{CF}_3 \text{F}_{\text{gem}}) = 8.4$  Hz,  $\text{CF}_3$ ), -90.35 (q, 2F,  ${}^4J(\text{F}_{\text{gem}} \text{CF}_3) = 8.8$  Hz,  $\text{F}_{\text{gem}}$ ).  ${}^1\text{H}$  NMR (400 MHz,  $\text{CDCl}_3$ , 291 K)  $\delta$  ppm: 7.53-7.41 (m, 20H, Ph).  ${}^{13}\text{C}\{^1\text{H}\}$  NMR (100 MHz,  $\text{CDCl}_3$ , 298 K)  $\delta$  ppm: 123.33 (s, Ph), 124.34 (s, Ph), 126.11 (s, Ph), 12.20 (s, Ph), 127.15 (s, Ph), 127.70 (s, Ph), 129.24 (s, Ph), 129.63 (s, Ph),  $\text{C}_1$ ,  $\text{C}_2$ , and  $\text{C}_3$  were not observed.  ${}^{29}\text{Si}\{^1\text{H}\}$  NMR (79 MHz,  $\text{CDCl}_3$ , 298 K)  $\delta$  ppm: -21.80 (m).  $\nu_{\text{max}}/\text{cm}^{-1}$  3150 (C-H in Ph, w) 2985 (C-H, m), 1670 (C=C, w), 1345, 1425 (C-F, str), 1270 (Si-C, w).

### 3. DFT calculations

#### 3.1 Calculated Mulliken Charges

Calculated Mulliken charges was optimised using hybrid Density Functional Theory (DFT) at the B3LYP/6-31G (d,p) level using the GAMESS software and Avogadro to present the geometric structure

##### 3.1.1 (Me)<sub>2</sub>Si(E-CF=CFCF<sub>3</sub>)<sub>2</sub> (a.5)

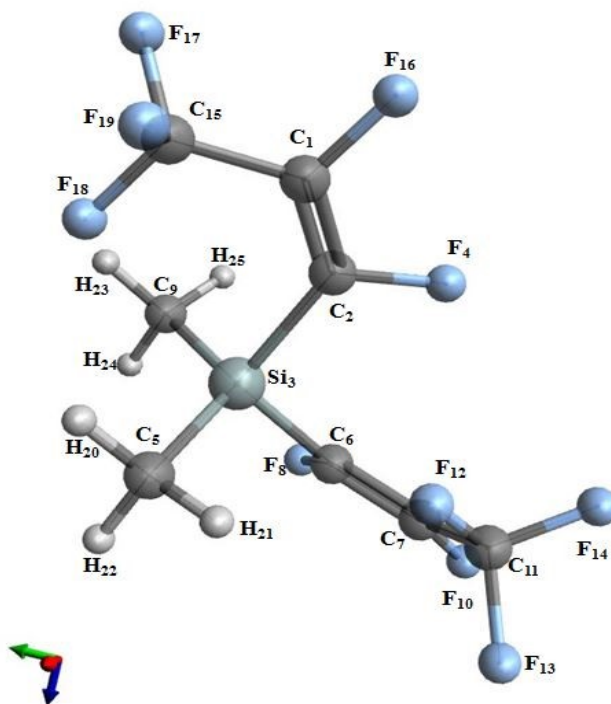

Figure 3 Avogadro representation of the geometric structure (Me)<sub>2</sub>Si(E-CF=CFCF<sub>3</sub>)<sub>2</sub> at lowest energy state

Table 1 Total Mulliken and Lowdin Atomic Populations

| Atom | Mull.POP. | Charge    | Low.POP.  | Charge    |
|------|-----------|-----------|-----------|-----------|
| C 1  | 5.792422  | 0.207578  | 5.937545  | 0.062455  |
| C 2  | 5.853106  | 0.146894  | 5.996687  | 0.003313  |
| Si 3 | 13.547697 | 0.452303  | 13.554013 | 0.445987  |
| F 4  | 9.275586  | -0.275586 | 9.128182  | -0.128182 |
| C 5  | 6.505396  | -0.505396 | 6.486134  | -0.486134 |
| C 6  | 5.842232  | 0.157768  | 5.991868  | 0.008132  |
| C 7  | 5.776375  | 0.223625  | 5.929703  | 0.070297  |
| F 8  | 9.280584  | -0.280584 | 9.131134  | -0.131134 |
| C 9  | 6.492158  | -0.492158 | 6.480313  | -0.480313 |
| F 10 | 9.265644  | -0.265644 | 9.107236  | -0.107236 |
| C 11 | 5.206878  | 0.793122  | 5.643280  | 0.356720  |
| F 12 | 9.253044  | -0.253044 | 9.111325  | -0.111325 |
| F 13 | 9.254959  | -0.254959 | 9.119764  | -0.119764 |
| F 14 | 9.247121  | -0.247121 | 9.111663  | -0.111663 |
| C 15 | 5.210271  | 0.789729  | 5.640200  | 0.359800  |
| F 16 | 9.264841  | -0.264841 | 9.108460  | -0.108460 |
| F 17 | 9.249437  | -0.249437 | 9.114282  | -0.114282 |
| F 18 | 9.256707  | -0.256707 | 9.117453  | -0.117453 |
| F 19 | 9.249996  | -0.249996 | 9.118715  | -0.118715 |
| H 20 | 0.862987  | 0.137013  | 0.862371  | 0.137629  |
| H 21 | 0.859940  | 0.140060  | 0.862356  | 0.137644  |
| H 22 | 0.868800  | 0.131200  | 0.863260  | 0.136740  |
| H 23 | 0.865172  | 0.134828  | 0.862393  | 0.137607  |
| H 24 | 0.861030  | 0.138970  | 0.862018  | 0.137982  |
| H 25 | 0.857620  | 0.142380  | 0.859644  | 0.140356  |

**Table 2** Bond order and valence analysis, (bond order threshold=0.050)

| Atom Pair | Distance | Order | Atom Pair | Distance | Order | Atom Pair | Distance | Order |
|-----------|----------|-------|-----------|----------|-------|-----------|----------|-------|
| 1 2       | 1.339    | 1.634 | 1 4       | 2.269    | 0.085 | 1 15      | 1.497    | 0.959 |
| 1 16      | 1.344    | 0.986 | 2 3       | 1.925    | 0.891 | 2 4       | 1.362    | 0.893 |
| 2 16      | 2.341    | 0.060 | 3 4       | 2.756    | 0.051 | 3 5       | 1.882    | 0.992 |
| 3 6       | 1.911    | 0.905 | 3 8       | 2.732    | 0.061 | 3 9       | 1.877    | 1.008 |
| 3 12      | 3.035    | 0.062 | 3 18      | 2.990    | 0.064 | 5 20      | 1.092    | 0.943 |
| 5 21      | 1.092    | 0.943 | 5 22      | 1.096    | 0.945 | 6 7       | 1.338    | 1.637 |
| 6 8       | 1.364    | 0.881 | 6 10      | 2.337    | 0.062 | 7 8       | 2.277    | 0.087 |
| 7 10      | 1.344    | 0.986 | 7 11      | 1.500    | 0.954 | 9 23      | 1.093    | 0.944 |
| 9 24      | 1.094    | 0.944 | 9 25      | 1.094    | 0.944 | 11 12     | 1.354    | 0.958 |
| 11 13     | 1.347    | 1.016 | 11 14     | 1.343    | 1.026 | 15 17     | 1.344    | 1.024 |

**Table 3** Bond order and valence analysis, (bond order threshold=0.050)

| Atom | Atomic Charge | Coordinates (Bohr) |          |          |
|------|---------------|--------------------|----------|----------|
|      |               | X                  | Y        | Z        |
| C    | 6             | -1.08472           | -6.59514 | -0.18943 |
| C    | 6             | -2.43374           | -7.10155 | 1.890595 |
| Si   | 14            | -2.82939           | -5.37283 | 5.06696  |
| F    | 9             | -3.82647           | -9.26026 | 1.74896  |
| C    | 6             | 0.242433           | -4.78072 | 6.756848 |
| C    | 6             | -4.88194           | -7.6391  | 6.989189 |
| C    | 6             | -4.62809           | -10.0669 | 7.648893 |
| F    | 9             | -7.04609           | -6.51266 | 7.819535 |
| C    | 6             | -4.76073           | -2.4328  | 4.612198 |
| F    | 9             | -6.40251           | -11.2523 | 9.024972 |
| C    | 6             | -2.4865            | -11.8179 | 7.027626 |
| F    | 9             | -0.62038           | -10.6208 | 5.751608 |
| F    | 9             | -1.47514           | -12.7777 | 9.157442 |
| F    | 9             | -3.27057           | -13.7717 | 5.610426 |
| C    | 6             | 0.5703             | -4.34622 | -0.64625 |
| F    | 9             | -1.11335           | -8.1458  | -2.19968 |
| F    | 9             | -0.06497           | -3.17398 | -2.80711 |
| F    | 9             | 0.344081           | -2.65206 | 1.264491 |
| F    | 9             | 3.024317           | -4.98859 | -0.81857 |
| H    | 1             | 1.476159           | -3.54505 | 5.657084 |
| H    | 1             | 1.239755           | -6.5497  | 7.124229 |
| H    | 1             | -0.14247           | -3.86672 | 8.574159 |
| H    | 1             | -3.69296           | -1.08667 | 3.46502  |
| H    | 1             | -5.20036           | -1.55405 | 6.43155  |
| H    | 1             | -6.54301           | -2.84117 | 3.649288 |

### 3.1.2 (Ph)<sub>2</sub>Si(*E*-CF=CFCF<sub>3</sub>)<sub>2</sub> (a.9)

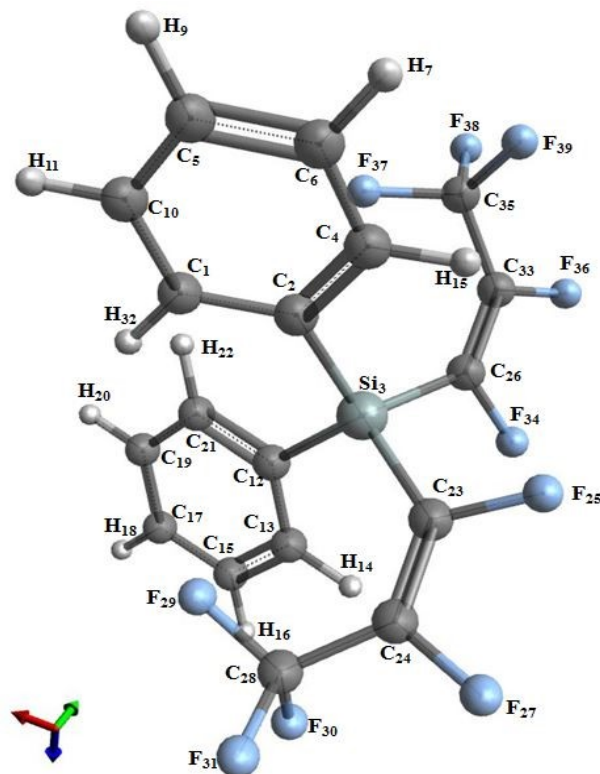

Figure 4 Avogadro representation of the geometric structure (Ph)<sub>2</sub>Si(CF=CFCF<sub>3</sub>)<sub>2</sub> at lowest energy state

Table 4 Total mulliken and lowdin atomic populations

| Atoms | Mull.POP. | Charge    | Low.POP.  | Charge    |
|-------|-----------|-----------|-----------|-----------|
| C 1   | 6.142560  | -0.142560 | 6.091330  | -0.091330 |
| C 2   | 6.216418  | -0.216418 | 6.181938  | -0.181938 |
| Si 3  | 13.231213 | 0.768787  | 13.477300 | 0.522700  |
| C 4   | 6.148941  | -0.148941 | 6.089488  | -0.089488 |
| H 5   | 0.844632  | 0.155368  | 0.879434  | 0.120566  |
| C 6   | 6.146228  | -0.146228 | 6.111781  | -0.111781 |
| H 7   | 0.838527  | 0.161473  | 0.879590  | 0.120410  |
| C 8   | 6.138140  | -0.138140 | 6.089432  | -0.089432 |
| H 9   | 0.839509  | 0.160491  | 0.881086  | 0.118914  |
| C 10  | 6.147856  | -0.147856 | 6.112622  | -0.112622 |
| H 11  | 0.841153  | 0.158847  | 0.882273  | 0.117727  |
| C 12  | 6.213223  | -0.213223 | 6.178071  | -0.178071 |
| C 13  | 6.139245  | -0.139245 | 6.086659  | -0.086659 |
| H 14  | 0.848762  | 0.151238  | 0.881655  | 0.118345  |
| C 15  | 6.147688  | -0.147688 | 6.110692  | -0.110692 |
| H 16  | 0.838270  | 0.161730  | 0.880429  | 0.119571  |
| C 17  | 6.137896  | -0.137896 | 6.090585  | -0.090585 |
| H 18  | 0.839160  | 0.160840  | 0.879810  | 0.120190  |
| C 19  | 6.148528  | -0.148528 | 6.111928  | -0.111928 |
| H 20  | 0.840626  | 0.159374  | 0.882927  | 0.117073  |
| C 21  | 6.151413  | -0.151413 | 6.093585  | -0.093585 |
| H 22  | 0.839001  | 0.160999  | 0.877163  | 0.122837  |
| C 23  | 5.843937  | 0.156063  | 5.956401  | 0.043599  |
| C 24  | 5.746694  | 0.253306  | 5.896504  | 0.103496  |
| F 25  | 9.365694  | -0.365694 | 9.178178  | -0.178178 |
| C 26  | 5.842656  | 0.157344  | 5.959056  | 0.040944  |
| F 27  | 9.359016  | -0.359016 | 9.159134  | -0.159134 |
| C 28  | 4.872348  | 1.127652  | 5.538094  | 0.461906  |
| F 29  | 9.352952  | -0.352952 | 9.146686  | -0.146686 |
| F 30  | 9.352668  | -0.352668 | 9.159144  | -0.159144 |
| F 31  | 9.348166  | -0.348166 | 9.149010  | -0.149010 |
| H 32  | 0.840764  | 0.159236  | 0.876057  | 0.123943  |



|      |          |           |          |           |
|------|----------|-----------|----------|-----------|
| C 33 | 5.740315 | 0.259685  | 5.896184 | 0.103816  |
| F 34 | 9.366531 | -0.366531 | 9.179956 | -0.179956 |
| C 35 | 4.877176 | 1.122824  | 5.539345 | 0.460655  |
| F 36 | 9.358906 | -0.358906 | 9.158966 | -0.158966 |
| F 37 | 9.352082 | -0.352082 | 9.148370 | -0.148370 |
| F 38 | 9.349168 | -0.349168 | 9.150301 | -0.150301 |
| F 39 | 9.351939 | -0.351939 | 9.158836 | -0.158836 |

**Table 5** Bond order and valence analysis, (bond order threshold=0.050)

| Atom Pair | Distance | Order | Atom Pair | Distance | Order | Atom Pair | Distance | Order |
|-----------|----------|-------|-----------|----------|-------|-----------|----------|-------|
| 1 2       | 1.395    | 1.432 | 1 6       | 2.769    | 0.087 | 1 10      | 1.386    | 1.444 |
| 1 32      | 1.075    | 0.953 | 2 3       | 1.874    | 0.961 | 2 4       | 1.398    | 1.406 |
| 2 8       | 2.795    | 0.090 | 3 12      | 1.876    | 0.964 | 3 23      | 1.925    | 0.883 |
| 3 26      | 1.921    | 0.888 | 3 34      | 2.693    | 0.057 | 4 5       | 1.077    | 0.954 |
| 4 6       | 1.383    | 1.467 | 4 10      | 2.766    | 0.089 | 6 7       | 1.075    | 0.959 |
| 6 8       | 1.386    | 1.437 | 8 9       | 1.076    | 0.959 | 8 10      | 1.384    | 1.452 |
| 10 11     | 1.076    | 0.960 | 12 13     | 1.396    | 1.415 | 12 17     | 2.796    | 0.090 |
| 12 21     | 1.397    | 1.419 | 13 14     | 1.075    | 0.954 | 13 15     | 1.384    | 1.458 |
| 13 19     | 2.767    | 0.088 | 15 16     | 1.075    | 0.959 | 15 17     | 1.385    | 1.443 |
| 15 21     | 2.767    | 0.088 | 17 18     | 1.076    | 0.959 | 17 19     | 1.385    | 1.446 |
| 19 20     | 1.075    | 0.959 | 19 21     | 1.385    | 1.453 | 21 22     | 1.076    | 0.953 |
| 23 24     | 1.317    | 1.780 | 23 25     | 1.340    | 0.800 | 24 27     | 1.323    | 0.871 |
| 24 28     | 1.497    | 1.001 | 26 33     | 1.317    | 1.775 | 26 34     | 1.341    | 0.796 |
| 28 29     | 1.320    | 0.888 | 28 30     | 1.319    | 0.915 | 28 31     | 1.316    | 0.929 |
| 33 35     | 1.499    | 1.001 | 33 36     | 1.324    | 0.869 | 35 37     | 1.320    | 0.894 |
| 35 38     | 1.316    | 0.929 | 35 39     | 1.319    | 0.916 |           |          |       |

**Table 6** Bond order and valence analysis, (bond order threshold=0.050)

| Atom | Atomic Charge | Coordinates (Bohr) |          |          |
|------|---------------|--------------------|----------|----------|
|      |               | X                  | Y        | Z        |
| C    | 6             | 1.635087           | -8.65531 | 2.725867 |
| C    | 6             | -0.62486           | -7.31582 | 2.934171 |
| Si   | 14            | -2.10928           | -6.65697 | 6.081856 |
| C    | 6             | -1.88067           | -6.63784 | 0.711919 |
| H    | 1             | -3.63663           | -5.61362 | 0.797839 |
| C    | 6             | -0.89894           | -7.24915 | -1.63121 |
| H    | 1             | -1.89024           | -6.70191 | -3.3187  |
| C    | 6             | 1.360707           | -8.56432 | -1.79829 |
| H    | 1             | 2.127673           | -9.04028 | -3.61956 |
| C    | 6             | 2.623894           | -9.26993 | 0.380043 |
| H    | 1             | 4.372106           | -10.2995 | 0.258684 |
| C    | 6             | 0.045194           | -6.7761  | 8.893501 |
| C    | 6             | -0.80377           | -7.60166 | 11.25075 |
| H    | 1             | -2.68928           | -8.32936 | 11.46415 |
| C    | 6             | 0.751927           | -7.5132  | 13.35132 |
| H    | 1             | 0.062006           | -8.16621 | 15.14766 |
| C    | 6             | 3.190224           | -6.58602 | 13.13591 |
| H    | 1             | 4.40116            | -6.5187  | 14.76721 |
| C    | 6             | 4.06391            | -5.73978 | 10.81908 |
| H    | 1             | 5.952229           | -5.00893 | 10.64404 |
| C    | 6             | 2.502593           | -5.82856 | 8.720869 |
| H    | 1             | 3.214229           | -5.14672 | 6.943026 |
| C    | 6             | -4.98562           | -8.86942 | 6.334551 |

|   |   |          |          |          |
|---|---|----------|----------|----------|
| C | 6 | -5.2589  | -11.2645 | 6.952272 |
| F | 9 | -7.10977 | -7.74342 | 5.540268 |
| C | 6 | -3.80564 | -3.45302 | 6.282731 |
| F | 9 | -7.49983 | -12.3722 | 6.885881 |
| C | 6 | -3.26089 | -13.1114 | 7.724156 |
| F | 9 | -0.97253 | -12.204  | 7.321036 |
| F | 9 | -3.43632 | -13.703  | 10.13967 |
| F | 9 | -3.49562 | -15.2138 | 6.417907 |
| H | 1 | 2.636548 | -9.23619 | 4.395148 |
| C | 6 | -3.43232 | -1.18455 | 5.329848 |
| F | 9 | -5.74403 | -3.59912 | 7.909404 |
| C | 6 | -1.342   | -0.30521 | 3.631008 |
| F | 9 | -4.97509 | 0.705904 | 5.880063 |
| F | 9 | 0.602279 | -1.86711 | 3.682402 |
| F | 9 | -0.54317 | 1.930084 | 4.371364 |
| F | 9 | -2.08879 | -0.09174 | 1.261884 |

### 3.1.3 (Ph)Si(E-CF=CF3)<sub>3</sub> (a.10)

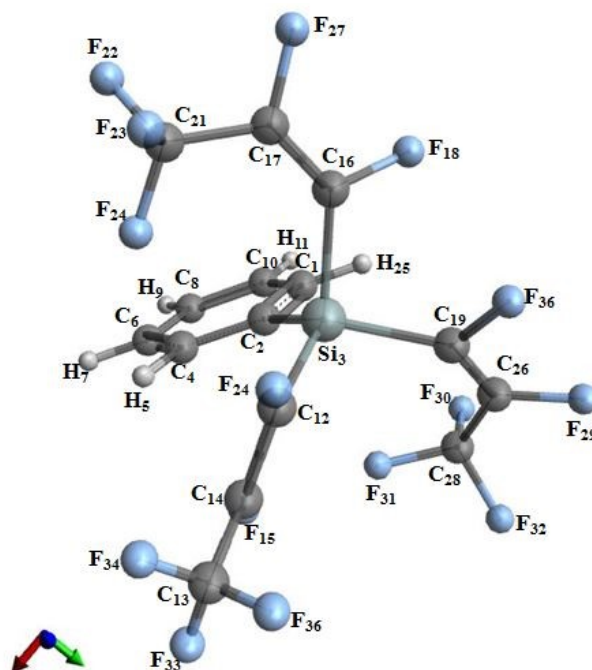

Figure 5 Avogadro representation of the geometric structure (Ph)Si(CF=CF3)<sub>3</sub> at lowest energy state

Table 7 Total Mulliken and Lowdin Atomic Populations

| Atom | Mull.POP. | Charge    | Low.POP.  | Charge    |
|------|-----------|-----------|-----------|-----------|
| C 1  | 6.129935  | -0.129935 | 6.080355  | -0.080355 |
| C 2  | 6.195701  | -0.195701 | 6.182192  | -0.182192 |
| Si 3 | 13.292030 | 0.707970  | 13.469776 | 0.530224  |
| C 4  | 6.151800  | -0.151800 | 6.085093  | -0.085093 |
| H 5  | 0.842250  | 0.157750  | 0.879847  | 0.120153  |
| C 6  | 6.145844  | -0.145844 | 6.111514  | -0.111514 |
| H 7  | 0.834315  | 0.165685  | 0.877322  | 0.122678  |
| C 8  | 6.133672  | -0.133672 | 6.081233  | -0.081233 |
| H 9  | 0.833875  | 0.166125  | 0.878462  | 0.121538  |
| C 10 | 6.148626  | -0.148626 | 6.107627  | -0.107627 |

|      |          |           |          |           |
|------|----------|-----------|----------|-----------|
| H 11 | 0.834503 | 0.165497  | 0.881264 | 0.118736  |
| C 12 | 5.842197 | 0.157803  | 5.961179 | 0.038821  |
| C 13 | 4.833097 | 1.166903  | 5.538683 | 0.461317  |
| C 14 | 5.774678 | 0.225322  | 5.892564 | 0.107436  |
| F 15 | 9.368802 | -0.368802 | 9.163523 | -0.163523 |
| C 16 | 5.845001 | 0.154999  | 5.967077 | 0.032923  |
| C 17 | 5.724840 | 0.275160  | 5.878290 | 0.121710  |
| F 18 | 9.364335 | -0.364335 | 9.175569 | -0.175569 |
| C 19 | 5.847159 | 0.152841  | 5.973540 | 0.026460  |
| F 20 | 9.351913 | -0.351913 | 9.150483 | -0.150483 |
| C 21 | 4.868291 | 1.131709  | 5.538938 | 0.461062  |
| C 22 | 9.360110 | -0.360110 | 9.148117 | -0.148117 |
| F 23 | 9.341656 | -0.341656 | 9.145425 | -0.145425 |
| F 24 | 9.347557 | -0.347557 | 9.148009 | -0.148009 |
| H 25 | 0.839303 | 0.160697  | 0.875435 | 0.124565  |
| C 26 | 5.712298 | 0.287702  | 5.876105 | 0.123895  |
| F 27 | 9.367008 | -0.367008 | 9.182639 | -0.182639 |
| C 28 | 4.877734 | 1.122266  | 5.544391 | 0.455609  |
| F 29 | 9.351481 | -0.351481 | 9.150176 | -0.150176 |
| F 30 | 9.342343 | -0.342343 | 9.139296 | -0.139296 |
| F 31 | 9.347554 | -0.347554 | 9.148728 | -0.148728 |
| F 32 | 9.350397 | -0.350397 | 9.154970 | -0.154970 |
| F 33 | 9.354101 | -0.354101 | 9.156832 | -0.156832 |
| F 34 | 9.338172 | -0.338172 | 9.137778 | -0.137778 |
| F 35 | 9.357784 | -0.357784 | 9.164957 | -0.164957 |
| F 36 | 9.349639 | -0.349639 | 9.152612 | -0.152612 |

**Table 8** Bond order and valence analysis, (bond order threshold=0.050)

| Atom Pair | Distance | Order | Atom Pair | Distance | Order | Atom Pair | Distance | Order |
|-----------|----------|-------|-----------|----------|-------|-----------|----------|-------|
| 1 2       | 1.394    | 1.421 | 1 6       | 2.772    | 0.088 | 1 10      | 1.384    | 1.454 |
| 1 25      | 1.074    | 0.954 | 2 3       | 1.862    | 0.984 | 2 4       | 1.397    | 1.407 |
| 2 8       | 2.789    | 0.088 | 3 12      | 1.908    | 0.889 | 3 16      | 1.910    | 0.917 |
| 3 19      | 1.904    | 0.928 | 3 27      | 2.625    | 0.063 | 4 5       | 1.078    | 0.956 |
| 4 6       | 1.383    | 1.466 | 4 10      | 2.766    | 0.088 | 6 7       | 1.075    | 0.957 |
| 6 8       | 1.386    | 1.441 | 8 9       | 1.076    | 0.957 | 8 10      | 1.385    | 1.446 |
| 10 11     | 1.075    | 0.958 | 12 14     | 1.313    | 1.763 | 12 35     | 1.331    | 0.829 |
| 13 14     | 1.502    | 0.971 | 13 33     | 1.319    | 0.924 | 13 34     | 1.310    | 0.954 |
| 13 36     | 1.317    | 0.928 | 14 15     | 1.333    | 0.816 | 16 17     | 1.315    | 1.780 |
| 16 18     | 1.338    | 0.804 | 17 20     | 1.319    | 0.883 | 17 21     | 1.497    | 1.001 |
| 19 26     | 1.316    | 1.759 | 19 27     | 1.345    | 0.786 | 21 22     | 1.323    | 0.871 |
| 21 23     | 1.313    | 0.930 | 21 24     | 1.316    | 0.927 | 26 28     | 1.500    | 0.996 |
| 26 29     | 1.320    | 0.878 | 28 30     | 1.315    | 0.916 | 28 31     | 1.316    | 0.929 |
| 28 32     | 1.319    | 0.919 |           |          |       |           |          |       |

**Table 9** Bond order and valence analysis, (bond order threshold=0.050)

| Atom | Atomic Charge | Coordinates (Bohr) |          |          |
|------|---------------|--------------------|----------|----------|
|      |               | X                  | Y        | Z        |
| C    | 6             | 2.089678           | -7.75113 | 2.546727 |
| C    | 6             | -0.50182           | -7.40181 | 2.864409 |
| Si   | 14            | -1.96426           | -6.59803 | 5.96218  |
| C    | 6             | -2.08099           | -7.72108 | 0.773635 |
| H    | 1             | -4.09538           | -7.48059 | 0.955351 |
| C    | 6             | -1.10065           | -8.35166 | -1.56543 |
| H    | 1             | -2.34211           | -8.58317 | -3.15698 |
| C    | 6             | 1.480544           | -8.69076 | -1.84577 |
| H    | 1             | 2.247319           | -9.18845 | -3.66102 |
| C    | 6             | 3.0726             | -8.39318 | 0.20906  |

|   |   |          |          |          |
|---|---|----------|----------|----------|
| H | 1 | 5.075558 | -8.65803 | -0.00467 |
| C | 6 | 0.112269 | -7.1662  | 8.85433  |
| C | 6 | 4.017879 | -6.09365 | 11.5107  |
| C | 6 | 2.218841 | -5.94081 | 9.31994  |
| F | 9 | 3.019707 | -4.25364 | 7.630525 |
| C | 6 | -5.01915 | -8.46782 | 6.407626 |
| C | 6 | -5.43466 | -10.8795 | 6.841507 |
| F | 9 | -7.08704 | -7.03443 | 6.149849 |
| C | 6 | -3.19662 | -3.26509 | 6.526641 |
| F | 9 | -7.74389 | -11.7894 | 7.068407 |
| C | 6 | -3.50624 | -12.9355 | 7.090025 |
| F | 9 | -1.2109  | -12.0795 | 6.593519 |
| F | 9 | -3.49839 | -13.906  | 9.374477 |
| F | 9 | -4.00206 | -14.769  | 5.485005 |
| H | 1 | 3.36084  | -7.51718 | 4.110343 |
| C | 6 | -3.13604 | -1.03801 | 5.422002 |
| F | 9 | -4.50031 | -3.33461 | 8.70712  |
| C | 6 | -1.80129 | -0.25113 | 3.047656 |
| F | 9 | -4.35965 | 0.896014 | 6.413938 |
| F | 9 | -0.09919 | -1.91945 | 2.345471 |
| F | 9 | -0.65247 | 1.922059 | 3.419289 |
| F | 9 | -3.41126 | 0.050701 | 1.169098 |
| F | 9 | 6.276101 | -6.77265 | 10.70233 |
| F | 9 | 3.275349 | -7.72206 | 13.2198  |
| F | 9 | -0.7414  | -8.82812 | 10.53719 |
| F | 9 | 4.243909 | -3.8598  | 12.58444 |

### 3.2 Electronic structure and DFT reaction energetics for substitution reaction with nucleophilic sources

Reaction energetics ( $\Delta E$ ) were calculated for substitution reaction in which Z-isomer (1) and E-isomer (2) are formed:

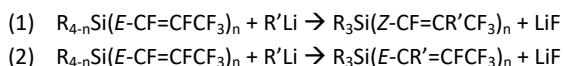

$\Delta E$  was computed according to:

$$(3) \quad \Delta E = E^{DFT}(\text{products}) - E^{DFT}(\text{reactants})$$

**Table 10** Electronic structure: HOMO, LUMO, electrostatic potential map (EP) colour coded on the charge density (isovalue 0.01) showing electron rich/deficient (red/blue) regions for compounds (a.1, a.2, a.4, a.5, a.6, a.7, a.8, and a.9) and DFT energetics  $\Delta E$  [kcal/mol] computed for substitution reaction (1) and (2).

| Electronic structure of compound                                   |      |    | Nucleophilic sources | Product                                                                                    | $\Delta E$ [kcal/mol] |
|--------------------------------------------------------------------|------|----|----------------------|--------------------------------------------------------------------------------------------|-----------------------|
| HOMO                                                               | LUMO | EP |                      |                                                                                            |                       |
| (Et) <sub>3</sub> Si(E-CF=CFCF <sub>3</sub> ) (a.1)                |      |    |                      |                                                                                            |                       |
|                                                                    |      |    | <sup>n</sup> BuLi    | (Et) <sub>3</sub> Si(Z-CF=C <sup>n</sup> BuCF <sub>3</sub> ) ( <b>12Z</b> )                | -76.35                |
|                                                                    |      |    |                      | (Et) <sub>3</sub> Si(E-C <sup>n</sup> Bu=CFCF <sub>3</sub> ) ( <b>12E</b> )                | -70.27                |
|                                                                    |      |    | <sup>t</sup> BuLi    | (Et) <sub>3</sub> Si(Z-CF=C <sup>t</sup> BuCF <sub>3</sub> ) ( <b>13Z</b> )                | -72.86                |
|                                                                    |      |    |                      | (Et) <sub>3</sub> Si(E-C <sup>t</sup> Bu=CFCF <sub>3</sub> )                               | -59.34                |
|                                                                    |      |    | MeLi                 | (Et) <sub>3</sub> Si(Z-CF=CMeCF <sub>3</sub> ) ( <b>14Z</b> )                              | -73.55                |
|                                                                    |      |    |                      | (Et) <sub>3</sub> Si(E-CMe=CFCF <sub>3</sub> ) ( <b>14E</b> )                              | -67.31                |
|                                                                    |      |    | PhLi                 | (Et) <sub>3</sub> Si(Z-CF=CPhCF <sub>3</sub> ) ( <b>15Z</b> )                              | -69.99                |
|                                                                    |      |    |                      | (Et) <sub>3</sub> Si(E-CPh=CFCF <sub>3</sub> ) ( <b>15E</b> )                              | -66.70                |
| ( <sup>n</sup> Bu) <sub>3</sub> Si(E-CF=CFCF <sub>3</sub> ) (a.2)  |      |    |                      |                                                                                            |                       |
|                                                                    |      |    | <sup>n</sup> BuLi    | ( <sup>n</sup> Bu) <sub>3</sub> Si(Z-CF=C <sup>n</sup> BuCF <sub>3</sub> ) ( <b>16Z</b> )  | -76.26                |
|                                                                    |      |    |                      | ( <sup>n</sup> Bu) <sub>3</sub> Si(E-C <sup>n</sup> Bu=CFCF <sub>3</sub> ) ( <b>16E</b> )  | -70.13                |
|                                                                    |      |    | <sup>t</sup> BuLi    | ( <sup>n</sup> Bu) <sub>3</sub> Si(Z-CF=C <sup>t</sup> BuCF <sub>3</sub> ) ( <b>17Z</b> )  | -72.80                |
|                                                                    |      |    |                      | ( <sup>n</sup> Bu) <sub>3</sub> Si(E-C <sup>t</sup> Bu=CFCF <sub>3</sub> )                 | -59.06                |
|                                                                    |      |    | MeLi                 | ( <sup>n</sup> Bu) <sub>3</sub> Si(Z-CF=CMeCF <sub>3</sub> ) ( <b>18Z</b> )                | -72.39                |
|                                                                    |      |    |                      | ( <sup>n</sup> Bu) <sub>3</sub> Si(E-CMe=CFCF <sub>3</sub> ) ( <b>18E</b> )                | -67.19                |
|                                                                    |      |    | PhLi                 | ( <sup>n</sup> Bu) <sub>3</sub> Si(Z-CF=CPhCF <sub>3</sub> ) ( <b>19Z</b> )                | -69.99                |
|                                                                    |      |    |                      | ( <sup>n</sup> Bu) <sub>3</sub> Si(E-CPh=CFCF <sub>3</sub> ) ( <b>19E</b> )                | -66.55                |
| <sup>n</sup> Bu(Me) <sub>2</sub> Si(E-CF=CFCF <sub>3</sub> ) (a.4) |      |    |                      |                                                                                            |                       |
|                                                                    |      |    | <sup>n</sup> BuLi    | <sup>n</sup> Bu(Me) <sub>2</sub> Si(Z-CF=C <sup>n</sup> BuCF <sub>3</sub> ) ( <b>20Z</b> ) | -75.51                |
|                                                                    |      |    |                      | <sup>n</sup> Bu(Me) <sub>2</sub> Si(E-C <sup>n</sup> Bu=CFCF <sub>3</sub> ) ( <b>20E</b> ) | -69.84                |
|                                                                    |      |    | <sup>t</sup> BuLi    | <sup>n</sup> Bu(Me) <sub>2</sub> Si(Z-CF=C <sup>t</sup> BuCF <sub>3</sub> ) ( <b>21Z</b> ) | -72.35                |
|                                                                    |      |    |                      | <sup>n</sup> Bu(Me) <sub>2</sub> Si(E-C <sup>t</sup> Bu=CFCF <sub>3</sub> )                | -62.45                |
|                                                                    |      |    | MeLi                 | <sup>n</sup> Bu(Me) <sub>2</sub> Si(Z-CF=CMeCF <sub>3</sub> ) ( <b>22Z</b> )               | -72.80                |
|                                                                    |      |    |                      | <sup>n</sup> Bu(Me) <sub>2</sub> Si(E-CMe=CFCF <sub>3</sub> ) ( <b>22E</b> )               | -68.13                |
|                                                                    |      |    | PhLi                 | <sup>n</sup> Bu(Me) <sub>2</sub> Si(Z-CF=CPhCF <sub>3</sub> )                              | -69.15                |
|                                                                    |      |    |                      | <sup>n</sup> Bu(Me) <sub>2</sub> Si(E-CPh=CFCF <sub>3</sub> )                              | -67.07                |
| (Me) <sub>2</sub> PhSi(E-CF=CFCF <sub>3</sub> ) (a.5)              |      |    |                      |                                                                                            |                       |
|                                                                    |      |    | <sup>n</sup> BuLi    | Me <sub>2</sub> PhSi(Z-CF=C <sup>n</sup> BuCF <sub>3</sub> ) ( <b>23Z</b> )                | -76.68                |
|                                                                    |      |    |                      | Me <sub>2</sub> PhSi(E-C <sup>n</sup> Bu=CFCF <sub>3</sub> ) ( <b>23E</b> )                | -71.58                |
|                                                                    |      |    | <sup>t</sup> BuLi    | (Me) <sub>2</sub> PhSi(Z-CF=C <sup>t</sup> BuCF <sub>3</sub> ) ( <b>24Z</b> )              | -72.37                |
|                                                                    |      |    |                      | (Me) <sub>2</sub> PhSi(E-C <sup>t</sup> Bu=CFCF <sub>3</sub> ) ( <b>24E</b> )              | -63.14                |
|                                                                    |      |    | MeLi                 | (Me) <sub>2</sub> PhSi(Z-CF=CMeCF <sub>3</sub> ) ( <b>25Z</b> )                            | -72.75                |
|                                                                    |      |    |                      | (Me) <sub>2</sub> PhSi(E-CMe=CFCF <sub>3</sub> ) ( <b>25E</b> )                            | -69.06                |
|                                                                    |      |    | PhLi                 | (Me) <sub>2</sub> PhSi(Z-CF=CPhCF <sub>3</sub> )                                           | -69.10                |
|                                                                    |      |    |                      | (Me) <sub>2</sub> PhSi(E-CPh=CFCF <sub>3</sub> )                                           | -66.96                |
| (Ph) <sub>2</sub> MeSi(E-CF=CFCF <sub>3</sub> ) (a.6)              |      |    |                      |                                                                                            |                       |
|                                                                    |      |    | <sup>n</sup> BuLi    | (Ph) <sub>2</sub> MeSi(Z-CF=C <sup>n</sup> BuCF <sub>3</sub> ) ( <b>26Z</b> )              | -76.63                |
|                                                                    |      |    |                      | (Ph) <sub>2</sub> MeSi(E-C <sup>n</sup> Bu=CFCF <sub>3</sub> ) ( <b>26E</b> )              | -72.30                |
|                                                                    |      |    | <sup>t</sup> BuLi    | (Ph) <sub>2</sub> MeSi(Z-CF=C <sup>t</sup> BuCF <sub>3</sub> ) ( <b>27Z</b> )              | -72.24                |
|                                                                    |      |    |                      | (Ph) <sub>2</sub> MeSi(E-C <sup>t</sup> Bu=CFCF <sub>3</sub> )                             | -64.10                |
|                                                                    |      |    | MeLi                 | (Ph) <sub>2</sub> MeSi(Z-CF=CMeCF <sub>3</sub> ) ( <b>28Z</b> )                            | -72.70                |
|                                                                    |      |    |                      | (Ph) <sub>2</sub> MeSi(E-CMe=CFCF <sub>3</sub> ) ( <b>28E</b> )                            | -69.89                |
|                                                                    |      |    | PhLi                 | (Ph) <sub>2</sub> MeSi(Z-CF=CPhCF <sub>3</sub> ) ( <b>29Z</b> )                            | -68.93                |
|                                                                    |      |    |                      | (Ph) <sub>2</sub> MeSi(E-CPh=CFCF <sub>3</sub> )                                           | -66.86                |
| (Me) <sub>2</sub> Si(E-CF=CFCF <sub>3</sub> ) <sub>2</sub> (a.7)   |      |    |                      |                                                                                            |                       |
|                                                                    |      |    | <sup>n</sup> BuLi    | (Me) <sub>2</sub> Si(Z-CF=C <sup>n</sup> BuCF <sub>3</sub> ) <sub>2</sub> ( <b>30Z</b> )   | -77.56                |
|                                                                    |      |    |                      | (Me) <sub>2</sub> Si(E-C <sup>n</sup> Bu=CFCF <sub>3</sub> ) <sub>2</sub> ( <b>30E</b> )   | -73.24                |
|                                                                    |      |    | <sup>t</sup> BuLi    | (Me) <sub>2</sub> Si(Z-CF=C <sup>t</sup> BuCF <sub>3</sub> ) <sub>2</sub> ( <b>31Z</b> )   | -81.69                |
|                                                                    |      |    |                      | (Me) <sub>2</sub> Si(E-C <sup>t</sup> Bu=CFCF <sub>3</sub> ) <sub>2</sub>                  | -64.25                |
|                                                                    |      |    | MeLi                 | (Me) <sub>2</sub> Si(Z-CF=CMeCF <sub>3</sub> ) <sub>2</sub> ( <b>32Z</b> )                 | -73.58                |
|                                                                    |      |    |                      | (Me) <sub>2</sub> Si(E-CMe=CFCF <sub>3</sub> ) <sub>2</sub> ( <b>32E</b> )                 | -70.29                |
|                                                                    |      |    | PhLi                 | (Me) <sub>2</sub> Si(Z-CF=CPhCF <sub>3</sub> ) <sub>2</sub>                                | -69.82                |

|                                                                                       |                                                                                   |                                                                                   |                   |                                                                                                        |         |
|---------------------------------------------------------------------------------------|-----------------------------------------------------------------------------------|-----------------------------------------------------------------------------------|-------------------|--------------------------------------------------------------------------------------------------------|---------|
|                                                                                       |                                                                                   |                                                                                   |                   | (Me) <sub>2</sub> Si(E-CPh=CF <sub>3</sub> ) <sub>2</sub>                                              | -68.58  |
| ( <sup>i</sup> Pr) <sub>2</sub> Si(E-CF=CF <sub>3</sub> ) <sub>2</sub> ( <b>a.8</b> ) |                                                                                   |                                                                                   |                   |                                                                                                        |         |
| 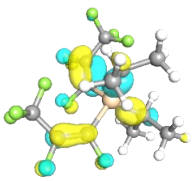     |  |  | <sup>n</sup> BuLi | ( <sup>i</sup> Pr) <sub>2</sub> Si(Z-CF=C <sup>n</sup> BuCF <sub>3</sub> ) <sub>2</sub> ( <b>33Z</b> ) | -77.26  |
|                                                                                       |                                                                                   |                                                                                   |                   | ( <sup>i</sup> Pr) <sub>2</sub> Si(E-C <sup>n</sup> Bu=CF <sub>3</sub> ) <sub>2</sub>                  | -69.34  |
|                                                                                       |                                                                                   |                                                                                   | <sup>t</sup> BuLi | ( <sup>i</sup> Pr) <sub>2</sub> Si(Z-CF=C <sup>t</sup> BuCF <sub>3</sub> ) <sub>2</sub> ( <b>34Z</b> ) | -73.08  |
|                                                                                       |                                                                                   |                                                                                   |                   | ( <sup>i</sup> Pr) <sub>2</sub> Si(E-C <sup>t</sup> Bu=CF <sub>3</sub> ) <sub>2</sub>                  | -57.94  |
|                                                                                       |                                                                                   |                                                                                   | MeLi              | ( <sup>i</sup> Pr) <sub>2</sub> Si(Z-CF=CMeCF <sub>3</sub> ) <sub>2</sub> ( <b>35Z</b> )               | -73.38  |
|                                                                                       |                                                                                   |                                                                                   |                   | ( <sup>i</sup> Pr) <sub>2</sub> Si(E-CMe=CF <sub>3</sub> ) <sub>2</sub>                                | -67.84  |
|                                                                                       |                                                                                   |                                                                                   | PhLi              | ( <sup>i</sup> Pr) <sub>2</sub> Si(Z-CF=CPhCF <sub>3</sub> ) <sub>2</sub>                              | -69.72  |
|                                                                                       | ( <sup>i</sup> Pr) <sub>2</sub> Si(E-CPh=CF <sub>3</sub> ) <sub>2</sub>           | -65.62                                                                            |                   |                                                                                                        |         |
| (Ph) <sub>2</sub> Si(E-CF=CF <sub>3</sub> ) <sub>2</sub> ( <b>a.9</b> )               |                                                                                   |                                                                                   |                   |                                                                                                        |         |
|      |  |  | <sup>n</sup> BuLi | (Ph) <sub>2</sub> Si(Z-CF=C <sup>n</sup> BuCF <sub>3</sub> ) <sub>2</sub> ( <b>36Z</b> )               | -77.081 |
|                                                                                       |                                                                                   |                                                                                   |                   | (Ph) <sub>2</sub> Si(E-C <sup>n</sup> Bu=CF <sub>3</sub> ) <sub>2</sub> ( <b>36E</b> )                 | -72.876 |
|                                                                                       |                                                                                   |                                                                                   | <sup>t</sup> BuLi | (Ph) <sub>2</sub> Si(Z-CF=C <sup>t</sup> BuCF <sub>3</sub> ) <sub>2</sub>                              | -72.736 |
|                                                                                       |                                                                                   |                                                                                   |                   | (Ph) <sub>2</sub> Si(E-C <sup>t</sup> Bu=CF <sub>3</sub> ) <sub>2</sub>                                | -63.933 |
|                                                                                       |                                                                                   |                                                                                   | MeLi              | (Ph) <sub>2</sub> Si(Z-CF=CMeCF <sub>3</sub> ) <sub>2</sub>                                            | -73.245 |
|                                                                                       |                                                                                   |                                                                                   |                   | (Ph) <sub>2</sub> Si(E-CMe=CF <sub>3</sub> ) <sub>2</sub>                                              | -70.407 |
|                                                                                       |                                                                                   |                                                                                   | PhLi              | (Ph) <sub>2</sub> Si(Z-CF=CPhCF <sub>3</sub> ) <sub>2</sub> ( <b>37Z</b> )                             | -69.534 |
|                                                                                       | (Ph) <sub>2</sub> Si(E-CPh=CF <sub>3</sub> ) <sub>2</sub>                         | -67.947                                                                           |                   |                                                                                                        |         |

## 4. Crystallographic data

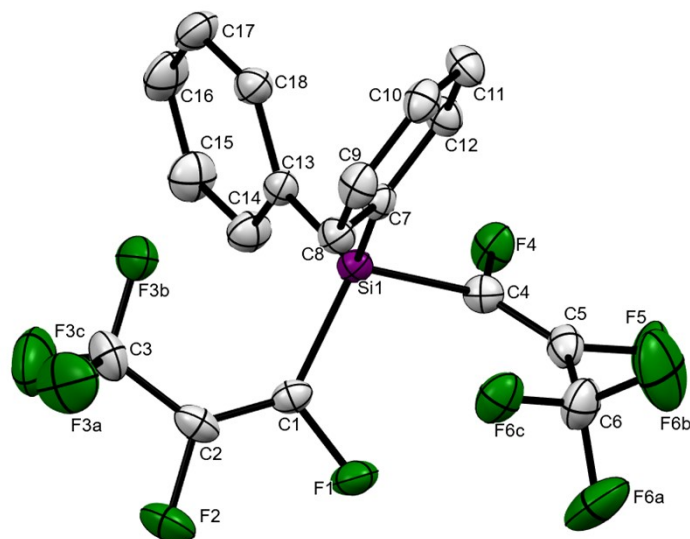

**Figure 6** ORTEP representation of the structure of  $(\text{Ph})_2\text{Si}(\text{CF}=\text{CF}_3)_2$  (**a.9**), (hydrogen atoms omitted for clarity), thermal ellipsoids are shown at 50%

**Table 11** Summary of crystallographic data of  $(\text{Ph})_2\text{Si}(\text{CF}=\text{CF}_3)_2$

|                                                                               |                                                                                                                                                                                             |
|-------------------------------------------------------------------------------|---------------------------------------------------------------------------------------------------------------------------------------------------------------------------------------------|
| Chemical formula                                                              | $\text{C}_{18}\text{H}_{10}\text{F}_{10}\text{Si}$                                                                                                                                          |
| $M_r$                                                                         | 444.35                                                                                                                                                                                      |
| Crystal system, space group                                                   | Triclinic, $P1$                                                                                                                                                                             |
| Temperature (K)                                                               | 150                                                                                                                                                                                         |
| $a, b, c$ ( $\text{\AA}$ )                                                    | 9.4952 (8), 10.2127 (10), 10.9000 (9)                                                                                                                                                       |
| $a, b, \gamma$ ( $^\circ$ )                                                   | 81.603 (8), 88.316 (7), 63.297 (9)                                                                                                                                                          |
| $V$ ( $\text{\AA}^3$ )                                                        | 933.36 (16)                                                                                                                                                                                 |
| $Z$                                                                           | 2                                                                                                                                                                                           |
| Radiation type                                                                | Mo $K\alpha$                                                                                                                                                                                |
| $\mu$ ( $\text{mm}^{-1}$ )                                                    | 0.22                                                                                                                                                                                        |
| Crystal size (mm)                                                             | $0.45 \times 0.25 \times 0.12$                                                                                                                                                              |
| Diffractometer                                                                | SuperNova, Single source at offset, Eos                                                                                                                                                     |
| Absorption correction                                                         | Multi-scan<br><i>CrysAlis PRO</i> 1.171.38.41 (Rigaku Oxford Diffraction, 2015) Empirical absorption correction using spherical harmonics, implemented in SCALE3 ABSPACK scaling algorithm. |
| $T_{\min}, T_{\max}$                                                          | 0.580, 1.000                                                                                                                                                                                |
| No. of measured, independent and observed [ $I \geq 2\sigma(I)$ ] reflections | 7301, 3974, 3113                                                                                                                                                                            |
| $R_{\text{int}}$                                                              | 0.029                                                                                                                                                                                       |
| $(\sin \theta)_{\text{max}}$ ( $\text{\AA}^{-1}$ )                            | 0.617                                                                                                                                                                                       |
| $R[F^2 > 2s(F^2)], wR(F^2), S$                                                | 0.048, 0.100, 1.05                                                                                                                                                                          |
| No. of reflections                                                            | 3668                                                                                                                                                                                        |
| No. of parameters                                                             | 262                                                                                                                                                                                         |
| H-atom treatment                                                              | H-atom parameters constrained                                                                                                                                                               |
| $D\rho_{\text{max}}, D\rho_{\text{min}}$ ( $\text{e \AA}^{-3}$ )              | 0.51, -0.38                                                                                                                                                                                 |

**Table 12** Geometric parameters (Å & °) of (Ph)<sub>2</sub>Si(CF=CF<sub>3</sub>)<sub>2</sub>

| Atoms       | Bond length Å | Atoms       | Bond length Å |
|-------------|---------------|-------------|---------------|
| Si1—C4      | 1.906 (2)     | C11—C12     | 1.379 (3)     |
| Si1—C1      | 1.895 (2)     | C11—C10     | 1.385 (3)     |
| Si1—C13     | 1.853 (2)     | C12—C7      | 1.397 (3)     |
| Si1—C7      | 1.850 (2)     | C15—C14     | 1.380 (3)     |
| F2—C2       | 1.342 (3)     | C8—C9       | 1.383 (3)     |
| F1—C1       | 1.362 (2)     | C8—C7       | 1.393 (3)     |
| F4—C4       | 1.365 (3)     | C9—C10      | 1.377 (4)     |
| C4—C5       | 1.319 (3)     | C1—C2       | 1.323 (3)     |
| F6c—C6      | 1.329 (3)     | F6b—C6      | 1.314 (3)     |
| F3b—C3      | 1.326 (3)     | C13—C18     | 1.394 (3)     |
| F5—C5       | 1.349 (3)     | C13—C14     | 1.396 (4)     |
| C5—C6       | 1.484 (4)     | F6a—C6      | 1.334 (3)     |
| F3a—C3      | 1.330 (3)     | F3c—C3      | 1.319 (3)     |
| C16—C15     | 1.374 (4)     | C18—C17     | 1.388 (3)     |
| C16—C17     | 1.373 (4)     | C2—C3       | 1.491 (4)     |
| Atoms       | Angles°       | Atoms       | Angles°       |
| C1—Si1—C4   | 104.52 (10)   | C14—C13—C18 | 117.7 (2)     |
| C13—Si1—C4  | 105.48 (10)   | C17—C18—C13 | 120.3 (3)     |
| C13—Si1—C1  | 108.99 (11)   | C1—C2—F2    | 121.5 (2)     |
| C7—Si1—C4   | 109.15 (10)   | C3—C2—F2    | 110.2 (2)     |
| C7—Si1—C1   | 113.14 (10)   | C3—C2—C1    | 128.4 (2)     |
| C7—Si1—C13  | 114.77 (10)   | C9—C10—C11  | 120.1 (2)     |
| F4—C4—Si1   | 113.03 (15)   | C18—C17—C16 | 120.6 (2)     |
| C5—C4—Si1   | 132.54 (19)   | C12—C7—Si1  | 118.60 (17)   |
| C5—C4—F4    | 114.4 (2)     | C8—C7—Si1   | 123.48 (18)   |
| F5—C5—C4    | 121.6 (2)     | C8—C7—C12   | 117.9 (2)     |
| C6—C5—C4    | 127.9 (2)     | F3a—C3—F3b  | 107.4 (2)     |
| C6—C5—F5    | 110.5 (2)     | F3c—C3—F3b  | 108.0 (2)     |
| C17—C16—C15 | 120.0 (2)     | F3c—C3—F3a  | 107.2 (2)     |
| C10—C11—C12 | 119.9 (2)     | C2—C3—F3b   | 111.3 (2)     |
| C7—C12—C11  | 121.1 (2)     | C2—C3—F3a   | 110.9 (2)     |
| C14—C15—C16 | 119.8 (3)     | C2—C3—F3c   | 111.8 (2)     |
| C7—C8—C9    | 121.1 (2)     | C13—C14—C15 | 121.6 (2)     |
| C10—C9—C8   | 119.9 (2)     | C5—C6—F6c   | 112.3 (2)     |
| F1—C1—Si1   | 114.56 (16)   | F6b—C6—F6c  | 108.0 (2)     |
| C2—C1—Si1   | 131.75 (18)   | F6b—C6—C5   | 111.7 (2)     |
| C2—C1—F1    | 113.7 (2)     | F6a—C6—F6c  | 106.7 (2)     |
| C18—C13—Si1 | 122.35 (19)   | F6a—C6—C5   | 111.4 (2)     |
| C14—C13—Si1 | 119.92 (17)   | F6a—C6—F6b  | 106.5 (2)     |



## 5. References

- [1] P.W. Betteridge, J.R. Carruthers, R.I. Cooper, K. Prout, D.J. Watkin, *J. Appl. Cryst.*, **36**, 2003, 1487–1493.
- [2] O.V. Dolomanov, L.J. Bourhis, R.J. Gildea, J.A. Howard, H. Puschmann, *J. Appl. Cryst.*, **42**, 2009, 339–341.
- [3] G.M. Sheldrick, *Acta Cryst.*, **64**, 2008, 112–122.
- [4] T.R. Schneider, G.M. Sheldrick, *Acta Cryst.*, **58**, 2002, 1772–1779.
- [5] L.J. Farrugia, WinGX, *J. Appl. Cryst.*, **45**, 2012, 849–854.
- [6] C.F. Macrea, P.R. Eddington, P. McCabe, E. Pidcock, G.P. Shields, R. Taylor, M. Towler, J. van de Streek, *J. Appl. Cryst.*, **39**, 2006, 453–457.
- [7] A.L. Spek, *Acta Cryst. D*, **65**, 2009, 148–155.
